# Supplementary material for: Homo- and heterobimetallic transition metal cluster derived from [Cp*Fe(η5-E5)] (E = P, As) – unprecedented structural motifs of the resulting polypnictogen ligands
Source: Royal Society of Chemistry journal article supplement (doi:10.1039/d4dt01160k), 2024-01-01
Supplement: d4dt01160k1.pdf [file d4dt01160k1.pdf]

*Supporting Information of the manuscript entitled:*

## **Homo- and Heterobimetallic Transition Metal Cluster derived from [Cp\*Fe( $\eta^5$ -E<sub>5</sub>)] (E = P, As) – Unprecedented Structural Motifs of the resulting Polypnictogen Ligands**

Sabrina B. Dinauer,<sup>a</sup> Robert Szlosek,<sup>a</sup> Martin Piesch,<sup>a</sup> Gábor Balázs,<sup>a</sup> Stephan Reichl,<sup>a</sup> Lukas Prock,<sup>a</sup> Christoph Riesinger,<sup>a</sup> Marc D. Walter<sup>b</sup> and Manfred Scheer<sup>\*a</sup>

---

[a] S. B. Dinauer, R. Szlosek, Dr. M. Piesch, Dr. G. Balázs, Dr. Stephan Reichl, L. Prock, Dr. C. Riesinger, Prof. Dr. M. Scheer  
Institute of Inorganic Chemistry  
University of Regensburg, 93040 Regensburg (Germany)  
E-mail: [manfred.scheer@chemie.uni-regensburg.de](mailto:manfred.scheer@chemie.uni-regensburg.de)

[b] Prof. Dr. M. D. Walter  
Institute of Inorganic and Analytical Chemistry  
Technical University of Braunschweig  
38106 Braunschweig (Germany)  
E-mail: [mwalter@tu-bs.de](mailto:mwalter@tu-bs.de)

### **Author Contributions**

Sabrina B. Dinauer – performing experimental work, writing of original draft.

Robert Szlosek – performing all calculations, co-writing final manuscript.

Martin Piesch – performing experimental work (first syntheses of **1-Ni** and **2-Ni**).

Stephan Reichl – performing experimental work (first synthesis of **1-Mn**).

Christoph Riesinger – finalization of all single crystal X-ray structures.

Lukas Prock – performing experimental work (synthesis of [Cp'''Fe( $\mu$ -Br)]<sub>2</sub>).

Gábor Balázs – co-writing final manuscript.

Marc D. Walter – performing experimental work (synthesis of [Cp'''Mn(THF)( $\mu$ -I)]<sub>2</sub>) and co-writing final manuscript.

Manfred Scheer – project administration, funding acquisition, co-writing final manuscript.

All authors contributed to preparing the manuscript.

# Table of Contents

|      |                                                                                                                  |    |
|------|------------------------------------------------------------------------------------------------------------------|----|
| 1    | Experimental Part.....                                                                                           | 4  |
| 1.1  | Synthetic procedures and experimental details .....                                                              | 4  |
| 1.2  | Synthesis of $[(Cp^*Fe)(Cp''Cr)(\mu_3, \eta^{5:5}-P_5)]$ (1-Cr) .....                                            | 5  |
| 1.3  | Synthesis of $[(Cp^*Fe)(Cp''Cr)_2(\mu_3, \eta^{2:3:3}-As_4)(\mu_3-As)]$ (2-Cr) .....                             | 6  |
| 1.4  | Synthesis of $[(Cp^*Fe)(Cp''Mn)(\mu_3, \eta^{5:5}-P_5)]$ (1-Mn).....                                             | 7  |
| 1.5  | Reaction of $[Cp^*Fe(\eta^5-As_5)]$ , $KC_8$ and $[Cp''Mn(thf)(\mu-I)]_2$ .....                                  | 8  |
| 1.6  | Synthesis of $[(Cp^*Fe)(Cp''Fe)_2(\mu_3, \eta^{2:1:1}-P_2)(\mu, \eta^{3:3}-P_3)]$ (1-Fe).....                    | 9  |
| 1.7  | Synthesis of $[(Cp^*Fe)(Cp''Fe)_2(\mu_3, \eta^{2:1:1}-As_2)(\mu, \eta^{3:3}-As_3)]$ (2-Fe) .....                 | 10 |
| 1.8  | Synthesis of $[(Cp^*Fe)(Cp''Ni)_2(\mu_3, \eta^{2:1:1}-P_2)(\mu_3, \eta^{2:2:2}-P_3)]$ (1-Ni) .....               | 11 |
| 1.9  | Synthesis of $\{[(Cp^*Fe)(Cp''Ni)_2(\mu_3, \eta^{2:1:1}-P_2)(\mu_3, \eta^{2:2:2}-P_3)]Ag\}_2[FAl]_2$ (3-Ag)..... | 12 |
| 1.10 | Synthesis of $[(Cp^*Fe)(Cp''Ni)_2(\mu_3, \eta^{3:2:2}-As_4)(\mu_3-As)]$ (2-Ni).....                              | 13 |
| 2    | NMR spectroscopic investigations .....                                                                           | 14 |
| 2.1  | 1-Cr.....                                                                                                        | 14 |
| 2.2  | 2-Cr.....                                                                                                        | 15 |
| 2.3  | 1-Mn.....                                                                                                        | 15 |
| 2.4  | 2-Mn.....                                                                                                        | 18 |
| 2.5  | 1-Fe .....                                                                                                       | 19 |
| 2.6  | 2-Fe .....                                                                                                       | 21 |
| 2.7  | 1-Ni .....                                                                                                       | 21 |
| 2.8  | 2-Ni .....                                                                                                       | 23 |
| 2.9  | 3-Ag .....                                                                                                       | 24 |
| 2.10 | Syntheses starting from $[K(dme)_2]_2[Cp^*Fe(\eta^4-P_5)]$ .....                                                 | 25 |
| 3    | EPR studies .....                                                                                                | 27 |
| 3.1  | 1-Cr.....                                                                                                        | 27 |
| 3.2  | 2-Cr.....                                                                                                        | 28 |
| 3.3  | Impurities within 1-Fe and 2-Fe .....                                                                            | 28 |
| 4    | Details on single crystal X-ray structure analysis .....                                                         | 29 |
| 4.1  | Crystallographic information .....                                                                               | 30 |
| 4.2  | 1-Cr.....                                                                                                        | 31 |

|     |                             |    |
|-----|-----------------------------|----|
| 4.3 | 2-Cr.....                   | 32 |
| 4.4 | 1-Mn.....                   | 33 |
| 4.5 | 1-Fe .....                  | 33 |
| 4.6 | 2-Fe .....                  | 34 |
| 4.7 | 3-Ag .....                  | 34 |
| 4.8 | 2-Ni .....                  | 35 |
| 5   | Computational Details ..... | 37 |
| 6   | References.....             | 72 |

# 1 Experimental Part

## 1.1 Synthetic procedures and experimental details

All manipulations were performed using dry nitrogen standard Schlenk techniques or an argon filled glove box. Solvents and deuterated solvents were dried, degassed, and distilled by using standard procedures. The compounds  $[(\text{Cp}^*\text{Fe}(\eta^5\text{-E}_5))]^{[1]}$  (E = P (1), As (2)),  $[\text{K}(\text{dme})_2][\text{Cp}^*\text{Fe}(\eta^4\text{-P}_5)]$ ,<sup>[2]</sup>  $\text{KC}_8$ <sup>[3]</sup>,  $[\text{Cp}'''\text{Fe}(\mu\text{-Br})_2]$ ,<sup>[4]</sup>  $[\text{Cp}'''\text{Cr}(\mu\text{-Cl})_2]$ ,<sup>[5]</sup>  $[\text{Cp}'''\text{Mn}(\text{thf})(\mu\text{-I})_2]$ ,<sup>[6]</sup>  $[\text{Cp}'''\text{Ni}(\mu\text{-Br})_2]$ <sup>[7]</sup> and  $\text{Ag}[\text{FAI}]$ <sup>[8]</sup> ( $[\text{FAI}]^- = [\text{FAI}\{\text{O}(1\text{-C}_6\text{F}_5)\text{C}_6\text{F}_{10}\}_3]^-$ ) were synthesized according to literature known procedures.

NMR spectra were recorded on a Bruker Avance 400 ( $^1\text{H}$ : 400.132 MHz,  $^{19}\text{F}$ : 376.498 MHz,  $^{31}\text{P}$ : 161.975 MHz) or 300 ( $^1\text{H}$ : 300.131 MHz) spectrometer. Chemical shifts are referenced to  $\text{SiMe}_4$  ( $^1\text{H}$  NMR),  $\text{CFCl}_3$  ( $^{19}\text{F}$  NMR) and 85%  $\text{H}_3\text{PO}_4$  ( $^{31}\text{P}$  NMR) as external standard. Chemical shifts are given in ppm and coupling constants J in Hertz [Hz] without considering their sign.

Magnetic susceptibilities and effective magnetic moments  $\mu_{\text{eff}}$  of paramagnetic compounds in solution were determined by  $^1\text{H}$  NMR spectroscopy using the Evans method.<sup>[9]</sup>

LIFDI mass spectra were recorded using a Finnigan MAT 95 mass spectrometer and FD mass spectra were recorded using a Jeol AccuTOF GCX mass spectrometer by the analytical department of the University of Regensburg. All compounds were dissolved in the corresponding solvent under inert atmosphere. According to the mass/charge (m/z) ratio and the corresponding isotope pattern the observed fragments were assigned.

Data for elemental analysis (CHN) was accomplished by a Vario micro cube apparatus by the department of central analyses of the University of Regensburg. All compounds were filled in tin capsules under  $\text{N}_2$  or Argon atmosphere prior to the measurements.

The X-band EPR measurements were performed with a MiniScope MS400 device with a frequency of 9.44 GHz and a rectangular resonator TE102 of the company Magnostech GmbH. The compounds were dissolved in a glovebox under  $\text{N}_2$  inert gas atmosphere, placed in tip-sealed pasteur pipettes, and sealed with rubber caps. The measurements were conducted at room temperature and 77 K, respectively.

### General Information

To screen the best reaction conditions all reactions were performed at first using 1.0 eq 1 or 2, 2.5 eq  $\text{KC}_8$  and 1.0 eq  $[\text{Cp}'''\text{M}(\mu\text{-X})_2]$  and then optimized as described for each compound separately.

## 1.2 Synthesis of $[(\text{Cp}^*\text{Fe})(\text{Cp}'''\text{Cr})(\mu, \eta^{5:5}\text{-P}_5)]$ (**1-Cr**)

a) A freshly prepared solution of  $[(\text{Cp}^*\text{Fe})(\eta^5\text{-P}_5)]$  (200 mg, 0.578 mmol, 1.0 eq) and  $\text{KC}_8$  (195 mg, 1.445 mmol, 2.5 eq) in THF (5 mL) was cooled to  $-80^\circ\text{C}$ . Then a dark blue solution of  $[\text{Cp}'''\text{Cr}(\mu\text{-Cl})_2]$  (370 mg, 0.578 mmol, 1.0 eq) in THF (5 mL) was slowly added at  $-80^\circ\text{C}$ . The mixture turned dark red and was allowed to reach room temperature overnight. The solvent was removed *in vacuo*. Then the residue was dissolved in a small amount of  $\text{CH}_2\text{Cl}_2$ , silica gel was added and the solvent was removed *in vacuo*. The preabsorbed compound was purified by column chromatographic workup ( $\text{SiO}_2$ , hexane, 8 x 2.5 cm). Using hexane as an eluent **1-Cr** can be obtained as dark red fraction. After removing the solvent *in vacuo*, the residue was dissolved in  $\text{CH}_2\text{Cl}_2$  and layered with  $\text{CH}_3\text{CN}$ . After storage at room temperature for a few days, **1-Cr** can be obtained as dark red blocks. The supernatant was decanted off and the crystalline compound dried *in vacuo*.

Yield: 85 mg (0.134 mmol, 23 %).

$^1\text{H}$  NMR ( $\text{CD}_2\text{Cl}_2$ , 293 K):  $\delta$  [ppm] = 1.52 (s, br, 27H,  $\text{C}_5\text{H}_2t\text{Bu}_3$ ), -0.99 (s, br, 15H,  $\text{C}_5\text{Me}_5$ ). Signals for  $\text{C}_5\text{H}_2t\text{Bu}_3$  could not be found within the  $^1\text{H}$  NMR spectrum of **1-Cr**.

EPR (X-band, thf solution, 298 K):  $g = 1.918$ .

Evans-NMR ( $\text{CD}_2\text{Cl}_2$ , 293 K):  $\mu_{\text{eff}} = 1.21 \mu_{\text{B}}$  corresponding to  $\sim 1.0$  unpaired electron.

LIFDI-MS (toluene):  $m/z = 631.13$  ( $[\mathbf{1-Cr}]^+$ , 100%).

Elemental Analysis calculated (%) for  $\text{C}_{27}\text{H}_{44}\text{CrFeP}_5$ : C: 51.36, H: 7.02  
found [%]: C: 51.40, H: 6.97.

b) A freshly prepared solution of  $[(\text{Cp}^*\text{Fe})(\eta^5\text{-P}_5)]$  (200 mg, 0.578 mmol, 1.0 eq) and  $\text{KC}_8$  (195 mg, 1.445 mmol, 2.5 eq) in THF (5 mL) was cooled to  $-80^\circ\text{C}$ . Then a dark blue solution of  $[\text{Cp}'''\text{Cr}(\mu\text{-Cl})_2]$  (185 mg, 0.289 mmol, 0.5 eq) in THF (5 mL) was slowly added at  $-80^\circ\text{C}$ . The mixture turned dark red and was allowed to reach room temperature overnight and was filtered over diatomaceous earth. The solvent was removed *in vacuo*. Then the residue was dissolved in a small amount of  $\text{CH}_2\text{Cl}_2$ , and an excess of acetonitrile was added. After 12 hours storage at room temperature **1-Cr** can be obtained as dark red rods. The supernatant was decanted off and the crystalline compound washed with acetonitrile and dried *in vacuo*.

Yield: 80 mg (0.127 mmol, 44 % related to  $[\text{Cp}'''\text{Cr}(\mu\text{-Cl})_2]$ ).

The recorded  $^1\text{H}$  NMR data and the X-band EPR data (solid and solution) matches the spectroscopic data of **1-Cr** obtained via method a.

### 1.3 Synthesis of [(Cp\*Fe)(Cp'''Cr)<sub>2</sub>(μ<sub>3</sub>,η<sup>2:3:3</sup>-As<sub>4</sub>)(μ<sub>3</sub>-As)] (2-Cr)

a) A freshly prepared solution of [(Cp\*Fe)(η<sup>5</sup>-As<sub>5</sub>)] (100 mg, 0.177 mmol, 1.0 eq) and KC<sub>8</sub> (55 mg, 0.407 mmol, 2.3 eq) in THF (5 mL) was cooled to -80°C. Then a dark blue solution of [Cp'''Cr(μ-Cl)]<sub>2</sub> (114 mg, 0.177 mmol, 1.0 eq) in THF (3 mL) was slowly added at -80°C. The mixture turned dark brown and was allowed to reach room temperature overnight. The solvent was removed *in vacuo*. Then the residue was dissolved in a small amount of CH<sub>2</sub>Cl<sub>2</sub>, silica gel was added and the solvent was removed *in vacuo*. The preabsorbed compound was purified by column chromatographic workup (SiO<sub>2</sub>, hexane, 8 x 2.5 cm). Using hexane as an eluent **2-Cr** can be obtained as dark brown fraction. After removing the solvent *in vacuo*, the residue was dissolved in CH<sub>2</sub>Cl<sub>2</sub> and layered with CH<sub>3</sub>CN. After storage at room temperature for a few days, **2-Cr** can be obtained as light green-blue blocks. The supernatant was decanted off and the crystalline compound dried *in vacuo*.

Yield: 50 mg (0.044 mmol, 25 %).

<sup>1</sup>H NMR (CD<sub>2</sub>Cl<sub>2</sub>, 293 K): δ [ppm] = 1.57 (s, br, 30H, C<sub>5</sub>H<sub>2</sub>tBu<sub>3</sub>), -3.17 (s, br, 15H, C<sub>5</sub>Me<sub>5</sub>). Signals for the second Cp''' ligand (C<sub>5</sub>H<sub>2</sub>tBu<sub>3</sub>) and C<sub>5</sub>H<sub>2</sub>tBu<sub>3</sub> could not be found within the <sup>1</sup>H NMR spectrum of **2-Cr**.

EPR (X-band): broad, intense signal with unresolved hyperfine coupling in thf solution (293 K or 77 K) or as solid (298 K and 77 K) (see Figure S 27).

Evans-NMR (CD<sub>2</sub>Cl<sub>2</sub>, 293 K): μ<sub>eff</sub> = 1.36 μ<sub>B</sub> corresponding to ~1.0 unpaired electron.

FD-MS (CH<sub>2</sub>Cl<sub>2</sub>): m/z = 1136.12 ([**2-Cr**]<sup>+</sup>, 100%).

#### 1.4 Synthesis of $[(\text{Cp}^*\text{Fe})(\text{Cp}^{\text{***}}\text{Mn})(\mu, \eta^{5:5}\text{-P}_5)]$ (**1-Mn**)

a) A freshly prepared solution of  $[(\text{Cp}^*\text{Fe}(\eta^5\text{-P}_5)]$  (103.4 mg, 0.299 mmol, 1.0 eq) and  $\text{KC}_8$  (101.1 mg, 0.748 mmol, 2.5 eq) in THF (5 mL) was cooled to  $-80^\circ\text{C}$ . Then a light greenish solution of  $[\text{Cp}^{\text{***}}\text{Mn}(\text{thf})(\mu\text{-I})_2]$  (292.4 mg, 0.299 mmol, 1.0 eq) in THF (5 mL) was slowly added at  $-80^\circ\text{C}$ . The mixture turned dark green and was allowed to reach room temperature overnight. The solvent was removed *in vacuo*. Then the residue was extracted with *n*-pentane and filtered over diatomaceous earth. Reducing the solvent in *vacuo* and storing the concentrated solution at  $8^\circ\text{C}$  yielded **1-Mn** as brownish green plates. The supernatant was decanted off and the crystalline compound dried in *vacuo*. Due to the high sensitivity of this compound towards moisture and oxygen it is not fully characterized, although the  $^{31}\text{P}$  NMR spectrum of the reaction solution indicates a selective formation of **1-Mn** (cf. Figure S 5).

Yield: a few crystals

$^1\text{H}$  NMR ( $\text{C}_6\text{D}_6$ , 293 K):  $\delta$  [ppm] = 2.89 (s, 2H,  $\text{C}_5\text{H}_2\text{tBu}_3$ ), 1.34 (s, 18H,  $\text{C}_5\text{H}_2\text{tBu}_3$ ), 1.22 (s, 9H,  $\text{C}_5\text{H}_2\text{tBu}_3$ ), 0.88 (s, 15H,  $\text{C}_5\text{Me}_5$ ).

$^{31}\text{P}\{^1\text{H}\}$  NMR ( $\text{C}_6\text{D}_6$ , 298 K):  $\delta$  [ppm] = -38.4 (s, 5P, **1-Mn**).

$^{31}\text{P}\{^1\text{H}\}$  NMR ( $\text{C}_6\text{D}_6$ , 298 K):  $\delta$  [ppm] = -38.4 (s, 5P, **1-Mn**).

LIFDI-MS (toluene):  $m/z$  = 345.91 ( $[\mathbf{1}]^+$ , 100%).

b) A freshly prepared solution of  $[(\text{Cp}^*\text{Fe}(\eta^4\text{-P}_5)]^{2-}$  (0.151 mmol, 1.0 eq) in THF (5 mL) was cooled to  $-80^\circ\text{C}$ . Then a light greenish solution of  $[\text{Cp}^{\text{***}}\text{Mn}(\text{thf})(\mu\text{-I})_2]$  (70.0 mg, 0.076 mmol, 0.5 eq) in THF (5 mL) was slowly added at  $-80^\circ\text{C}$ . The mixture turned dark green and was allowed to reach room temperature overnight. The  $^{31}\text{P}$  NMR spectrum of the reaction solution measured with  $\text{C}_6\text{D}_6$  capillary and  $\text{PPh}_3$  ( $n = 0.016$  mmol) shows the formation of **1-Mn** along with signals for **1** and  $[(\text{Cp}^*\text{Fe})_2(\mu, \eta^{4:4}\text{-P}_{10})]^{2-}$  indicating redox processes (cf. Figure S 7).<sup>[2]</sup>

### 1.5 Reaction of $[\text{Cp}^*\text{Fe}(\eta^5\text{-As}_5)]$ , $\text{KC}_8$ and $[\text{Cp}'''\text{Mn}(\text{thf})(\mu\text{-I})_2]$

A freshly prepared solution of  $[(\text{Cp}^*\text{Fe}(\eta^5\text{-As}_5)]$  (169.0 mg, 0.299 mmol, 1.0 eq) and  $\text{KC}_8$  (101.1 mg, 0.748 mmol, 2.5 eq) in THF (5 mL) was cooled to  $-80^\circ\text{C}$ . Then a light greenish solution of  $[\text{Cp}'''\text{Mn}(\text{thf})(\mu\text{-I})_2]$  (292.4 mg, 0.299 mmol, 1.0 eq) in THF (5 mL) was slowly added at  $-80^\circ\text{C}$ . The mixture turned dark green and was allowed to reach room temperature overnight turning dark brown. The solvent was removed *in vacuo*. Then the residue was extracted with *n*-hexane and filtered over diatomaceous earth. Storing a concentrated solution in hexane at  $-30^\circ\text{C}$  or storing a mixture of hexane and hexamethyldisiloxane (1:1) at  $-30^\circ\text{C}$  did not lead to single crystals.  $^1\text{H}$  NMR spectroscopy suggests the formation of one major compound and one minor compound (see Figure S 8 and Figure S 9). Apart from that a broad singlet for  $[(\text{Cp}''')_2\text{Mn}]$  can be assigned<sup>[10]</sup> along with signals for  $\text{HCp}'''$ . However, we were not able to characterize the product of this reaction due to its sensitivity towards moisture and oxygen and the missing SC-XRD.



## 1.6 Synthesis of $[(\text{Cp}^*\text{Fe})(\text{Cp}'''\text{Fe})_2(\mu_3, \eta^{2:1:1}\text{-P}_2)(\mu, \eta^{3:3}\text{-P}_3)]$ (**1-Fe**)

a)  $[(\text{Cp}^*\text{Fe}(\eta^5\text{-P}_5)]$  (200 mg, 0.578 mmol, 1.0 eq),  $\text{KC}_8$  (195 mg, 1.445 mmol, 2.5 eq) and  $[\text{Cp}'''\text{Fe}(\mu\text{-Br})_2]$  (340 mg, 0.460 mmol, 0.8 eq) were weighed in a Schlenk tube and DME (10 mL) was added. The mixture turned dark brown and was stirred for 3 hours at room temperature. The solvent was removed *in vacuo*. Then the residue was dissolved in a small amount of  $\text{CH}_2\text{Cl}_2$ , silica gel was added and the solvent was removed *in vacuo*. The preabsorbed compound was purified by column chromatographic workup ( $\text{SiO}_2$ , hexane, 7 x 2.5 cm). Using hexane as an eluent **1-Fe** can be obtained as dark brown fraction. After removing the solvent *in vacuo*, the residue was dissolved in  $\text{CH}_2\text{Cl}_2$  and layered with  $\text{CH}_3\text{CN}$ . After storage at room temperature for a few days, **1-Fe** can be obtained as dark brown blocks. The supernatant was decanted off and the crystalline compound dried *in vacuo*.

Yield: 115 mg (0.124 mmol, 21 %).

$^1\text{H}$  NMR (thf- $d_8$ , 293 K):  $\delta$  [ppm] = 2.93 (s, br, 2H,  $\text{C}_5\text{H}_2\text{tBu}_3$ ), 2.46 (s, br, 2H,  $\text{C}_5\text{H}_2\text{tBu}_3$ ), 1.64 (s, 36H,  $\text{C}_5\text{H}_2\text{tBu}_3$ ), 1.59 (s, 18H,  $\text{C}_5\text{H}_2\text{tBu}_3$ ), 1.01 (s, 15H,  $\text{C}_5\text{Me}_5$ ).

$^{31}\text{P}\{^1\text{H}\}$  NMR (thf- $d_8$ , 293 K):  $\delta$  [ppm] = 385.4 (d,  $J_{\text{PP}} = 98$  Hz, 2P,  $\text{P}_A$ ), 376.5 (d,  $J_{\text{PP}} = 371$  Hz, 1P,  $\text{P}_B$ ), -66.6 (dt,  $J_{\text{PP}} = 382$  Hz,  $J_{\text{PP}} = 99$  Hz, 1P,  $\text{P}_M$ ), -231.8 (t,  $J_{\text{PP}} = 382$  Hz, 1P,  $\text{P}_X$ ).

$^{31}\text{P}$  NMR (thf- $d_8$ , 293 K):  $\delta$  [ppm] = 385.4 (d,  $J_{\text{PP}} = 98$  Hz, 2P,  $\text{P}_A$ ), 376.5 (d,  $J_{\text{PP}} = 371$  Hz, 1P,  $\text{P}_B$ ), -66.6 (dt,  $J_{\text{PP}} = 382$  Hz,  $J_{\text{PP}} = 99$  Hz, 1P,  $\text{P}_M$ ), -231.8 (t,  $J_{\text{PP}} = 382$  Hz, 1P,  $\text{P}_X$ ).

FD-MS ( $\text{CH}_2\text{Cl}_2$ ):  $m/z = 924.92$  ( $[\mathbf{1-Fe}]^+$ , 100%).

Elemental Analysis calculated (%) for  $\text{C}_{44}\text{H}_{73}\text{Fe}_3\text{P}_5$ : C: 57.17, H: 7.96  
found [%]: C: 57.11, H: 8.01.

b) When a 1.0:2.5:0.8 stoichiometry of  $[(\text{Cp}^*\text{Fe}(\eta^5\text{-P}_5)]$  (0.144 mmol) to  $\text{KC}_8$  (0.360 mmol) to  $[\text{Cp}'''\text{Fe}(\mu\text{-Br})_2]$  (0.106 mmol) is used, even after column chromatography traces of  $[\text{Cp}'''\text{Fe}(\mu\text{-Br})_2]$  are still present, which can just be determined by X-band EPR spectroscopy (cf. Figure S 28). To obtain analytically pure **1-Fe** 0.8 eq  $[\text{Cp}'''\text{Fe}(\mu\text{-Br})_2]$  must be used. In that case, after 3 hours stirring the X-band EPR spectrum remains silent and pure **1-Fe** is isolated. Nevertheless, in some cases minor impurities of  $[\text{Cp}'''\text{Fe}(\mu\text{-Br})_2]$  can still be detected by X-band EPR spectroscopy.

c) When 0.5 eq of  $[\text{Cp}'''\text{Fe}(\mu\text{-Br})_2]$  are used in the same one pot reaction in DME and the reaction is stirred at room temperature for 16 hours, no formation of **1-Fe** is observed. The  $^{31}\text{P}$

NMR spectrum of the reaction solution in dme with C<sub>6</sub>D<sub>6</sub> capillary shows solely signals for [(Cp\*Fe)<sub>2</sub>(μ,η<sup>4:4</sup>-P<sub>10</sub>)]<sup>2-</sup> (see Figure S 12).<sup>[2]</sup>

### 1.7 Synthesis of [(Cp\*Fe)(Cp'''Fe)<sub>2</sub>(μ<sub>3</sub>,η<sup>2:1:1</sup>-As<sub>2</sub>)(μ,η<sup>3:3</sup>-As<sub>3</sub>)] (**2-Fe**)

a) [(Cp\*Fe(η<sup>5</sup>-As<sub>5</sub>)] (163 mg, 0.289 mmol, 1.0 eq), KC<sub>8</sub> (98 mg, 0.723 mmol, 2.5 eq) and [Cp'''Fe(μ-Br)]<sub>2</sub> (170 mg, 0.231 mmol, 0.8 eq) were weighed in a Schlenk tube and DME (10 mL) was added. The mixture turned dark green brown and was stirred for 3 hours at room temperature. The solvent was removed *in vacuo*. Then the residue was dissolved in a small amount of CH<sub>2</sub>Cl<sub>2</sub>, silica gel was added and the solvent was removed *in vacuo*. The preabsorbed compound was purified by column chromatographic workup (SiO<sub>2</sub>, hexane, 7 x 2.5 cm). Using hexane as an eluent **2-Fe** can be obtained as dark brown fraction. After removing the solvent in *vacuo*, the residue was dissolved in CH<sub>2</sub>Cl<sub>2</sub> and layered with CH<sub>3</sub>CN. After storage at room temperature for a few days, **2-Fe** can be obtained as dark brown plates. The supernatant was decanted off and the crystalline compound dried in *vacuo*.

Yield: 65 mg (0.057 mmol, 20 %).

<sup>1</sup>H NMR (CD<sub>2</sub>Cl<sub>2</sub>, 293 K): δ [ppm] = 1.56 (s, br, C<sub>5</sub>H<sub>2</sub>tBu<sub>3</sub>), 1.48 (s, br, C<sub>5</sub>H<sub>2</sub>tBu<sub>3</sub>), 1.41 (s, br, C<sub>5</sub>H<sub>2</sub>tBu<sub>3</sub>), 0.83 (s, br, C<sub>5</sub>Me<sub>5</sub>). The signals at 1.56, 1.48 and 1.41 ppm are overlapping. Due to the overlap of the signals and the broad shape no rational integration of the signals is possible (see Figure S 13).

FD-MS (CH<sub>2</sub>Cl<sub>2</sub>): *m/z* = 1144.02 ([**2-Fe**]<sup>+</sup>, 100%).

Elemental Analysis calculated (%) for C<sub>44</sub>H<sub>73</sub>Fe<sub>3</sub>As<sub>5</sub>: C: 46.19, H: 6.43  
found [%]: C: 46.58, H: 6.29.

When a 1.0:2.5:0.8 stoichiometry of [(Cp\*Fe(η<sup>5</sup>-As<sub>5</sub>)] to KC<sub>8</sub> to [Cp'''Fe(μ-Br)]<sub>2</sub> (0.106 mmol) is used, even after column chromatography traces of [Cp'''Fe(μ-Br)]<sub>2</sub> are still present, which can just be determined by X-band EPR spectroscopy (cf. Figure S 28). To obtain analytically pure **2-Fe** 0.8 eq [Cp'''Fe(μ-Br)]<sub>2</sub> must be used. In that case, after 3 hours stirring the X-band EPR spectrum remains silent and pure **2-Fe** is isolated. Nevertheless, in some cases minor impurities of [Cp'''Fe(μ-Br)]<sub>2</sub> can still be detected by X-band EPR spectroscopy.

## 1.8 Synthesis of $[(\text{Cp}^*\text{Fe})(\text{Cp}'''\text{Ni})_2(\mu_3, \eta^{2:1:1}\text{-P}_2)(\mu_3, \eta^{2:2:2}\text{-P}_3)]$ (**1-Ni**)

$[(\text{Cp}^*\text{Fe}(\eta^5\text{-P}_5)]$  (1000 mg, 2.89 mmol, 1.0 eq),  $\text{KC}_8$  (1000 mg, 7.40 mmol, 2.5 eq) and  $[\text{Cp}'''\text{Ni}(\mu\text{-Br})_2]$  (2150 mg, 2.89 mmol, 1.0 eq) were weighed in a Schlenk tube and DME (50 mL) was added. The mixture turned dark red and was stirred for 30 min at room temperature. The solvent was removed *in vacuo*. Then the residue was dissolved in pentane and filtered over diatomaceous earth. Then the solvent was removed *in vacuo*. Then the residue was dissolved in a small amount of  $\text{CH}_2\text{Cl}_2$ , silica gel was added and the solvent was removed *in vacuo*. The preabsorbed compound was purified by column chromatographic workup ( $\text{SiO}_2$ , pentane, 15 x 4.5 cm). Using toluene as an eluent **1-Ni** can be obtained as dark red fraction. After removing the solvent *in vacuo*, a dark red-brown powder was obtained. Despite several attempts no single crystals of **1-Ni** could be obtained. Structural proof of the proposed complex **1-Ni** was done by coordination to silver (see Synthesis of  $\{[(\text{Cp}^*\text{Fe})(\text{Cp}'''\text{Ni})_2(\mu_3, \eta^{2:1:1}\text{-P}_2)(\mu_3, \eta^{2:2:2}\text{-P}_3)]\text{Ag}\}_2[\text{FAl}]_2$  (3-Ag)).

|                                                         |                                                                                                                                                                                                                                                                                                                                     |
|---------------------------------------------------------|-------------------------------------------------------------------------------------------------------------------------------------------------------------------------------------------------------------------------------------------------------------------------------------------------------------------------------------|
| Yield:                                                  | 1530 mg (1.64 mmol, 57 %)                                                                                                                                                                                                                                                                                                           |
| $^1\text{H}$ NMR (tol- $d_8$ , 253 K):                  | $\delta$ [ppm] = 5.61 (s, br, 2H, $\text{C}_5\text{H}_2\text{tBu}_3$ ), 5.58 (s, br, 2H, $\text{C}_5\text{H}_2\text{tBu}_3$ ), 1.83 (s, 15H, $\text{C}_5\text{Me}_5$ ), 1.55 (s, 18H, $\text{C}_5\text{H}_2\text{tBu}_3$ ), 1.50 (s, 18H, $\text{C}_5\text{H}_2\text{tBu}_3$ ), 1.47 (s, 18H, $\text{C}_5\text{H}_2\text{tBu}_3$ ). |
| $^{31}\text{P}\{^1\text{H}\}$ NMR (tol- $d_8$ , 253 K): | $\delta$ [ppm] = 390.0 (t, $J_{\text{PP}} = 156$ Hz, 1P, $P_3$ ), 280.7 (d, $J_{\text{PP}} = 156$ Hz, $J_{\text{PP}} = 24$ Hz, 2P, $P_3$ ), 152.8 (s, 2P, $P_2$ ).                                                                                                                                                                  |
| $^{31}\text{P}$ NMR (tol- $d_8$ , 253 K):               | $\delta$ [ppm] = 390.0 (t, $J_{\text{PP}} = 156$ Hz, 1P, $P_3$ ), 280.7 (d, $J_{\text{PP}} = 156$ Hz, $J_{\text{PP}} = 24$ Hz, 2P, $P_3$ ), 152.8 (s, 2P, $P_2$ ).                                                                                                                                                                  |
| FD-MS ( $\text{CH}_2\text{Cl}_2$ ):                     | $m/z = 928.18$ ( $[\mathbf{1-Ni}]^+$ , 100%).                                                                                                                                                                                                                                                                                       |
| Elemental Analysis                                      | calculated (%) for $\text{C}_{44}\text{H}_{73}\text{FeNi}_2\text{P}_5$ : C: 56.82, H: 7.91<br>found [%]: C: 57.29, H: 7.75.                                                                                                                                                                                                         |

When the reaction is performed using a stoichiometry of  $[(\text{Cp}^*\text{Fe}(\eta^5\text{-P}_5)]$  (200 mg, 0.578 mmol, 1.0 eq),  $\text{KC}_8$  (198 mg, 1.445 mmol, 2.5 eq) and  $[\text{Cp}'''\text{Ni}(\mu\text{-Br})_2]$  (215 mg, 0.289 mmol, 0.5 eq) in dme for 30 min, the  $^{31}\text{P}\{^1\text{H}\}$  NMR spectrum of the reaction solution shows no set of signals for **1-Ni**. Instead, small multiplets for  $[(\text{Cp}^*\text{Fe})_2(\mu, \eta^{4:4}\text{-P}_{10})]^{2-}$  can be assigned<sup>[2]</sup> and a broad signal at  $\delta = 32.9$  ppm is observed (see Figure S 17). Purification by column chromatography ( $\text{SiO}_2$ , hexane, 12 x 2.5 cm) eluted an orange-brown fraction using a 1:1 mixture of hexane/ $\text{CH}_2\text{Cl}_2$ . From a concentrated solution in  $\text{CH}_2\text{Cl}_2$  layered with acetonitrile no single crystals could be formed. The formed compound could not be unequivocally characterized.

## 1.9 Synthesis of $[(\text{Cp}^*\text{Fe})(\text{Cp}''\text{Ni})_2(\mu_3, \eta^{2:1:1}\text{-P}_2)(\mu_3, \eta^{2:2:2}\text{-P}_3)]\text{Ag}_2[\text{FAI}]_2$ (**3-Ag**)

A solution of  $\text{Ag}[\text{FAI}]$  (160 mg, 0.107 mmol, 1 eq) in *o*-DFB (5 mL) was added to a stirred solution of **1-Ni** (100 mg, 0.107 mmol, 1 eq) in *o*-DFB (5 mL). The brown mixture was stirred for 2 h at room temperature. Then the solvent was removed in vacuo and the residue washed with hexane. The residue was dried in vacuo, dissolved in *o*-DFB and layered with hexane. After storage at room temperature for 2 days, **3-Ag** can be obtained as dark brown blocks. The supernatant was decanted off and the crystalline compound dried in vacuo.

|                                                     |                                                                                                                                                                                                                                                                                                                      |
|-----------------------------------------------------|----------------------------------------------------------------------------------------------------------------------------------------------------------------------------------------------------------------------------------------------------------------------------------------------------------------------|
| Yield:                                              | 57 mg (0.055 mmol, 51 %)                                                                                                                                                                                                                                                                                             |
| $^1\text{H}$ NMR (thf- $d_8$ , 293 K):              | Signals can not be properly assigned due to decomposition in solution and rearrangement processes (see Figure S 19 to Figure S 20).                                                                                                                                                                                  |
| $^{31}\text{P}$ NMR (thf- $d_8$ , 293 K):           | $\delta$ [ppm] = 430.6 (t, $J_{PP}$ = 151 Hz, br), 248.8 (d, $J_{PP}$ = 151 Hz, br), 88.2 (br).                                                                                                                                                                                                                      |
| $^{19}\text{F}\{^1\text{H}\}$ (thf- $d_8$ , 293 K): | $\delta$ [ppm] = -112.0 (d, $J_{FF}$ = 275 Hz, 6F), -116.2 (d, $J_{FF}$ = 281 Hz, 6F), -121.2 (d, $J_{FF}$ = 281 Hz, 3F), -127.0 (s, 6F), -129.8 (d, $J_{FF}$ = 281 Hz, 6F), -136.9 (d, $J_{FF}$ = 281 Hz, 6F), -141.0 (d, $J_{FF}$ = 281 Hz, 3F), -154.8 (s, 3F), -165.2 (t, $J_{FF}$ = 20 Hz, 6F), -170.7 (s, 1F). |
| ESI-MS ( $\text{CH}_2\text{Cl}_2$ , pos. mode):     | $m/z$ = 928.18 ( $[\mathbf{3-Ag}]^{2+}$ , 100%)                                                                                                                                                                                                                                                                      |
| ESI-MS ( $\text{CH}_2\text{Cl}_2$ , neg. mode):     | $m/z$ = 1037.15 ( $[\text{FAI}]^-$ , 100%)                                                                                                                                                                                                                                                                           |
| Elemental Analysis                                  | calculated (%) for $\text{C}_{160}\text{H}_{146}\text{Fe}_2\text{Ni}_4\text{P}_{10}\text{O}_6\text{Al}_2\text{F}_{92}\text{Ag}_2$ : C: 39.72, H: 3.04      found [%]: C: 39.86, H: 3.16.                                                                                                                             |

Compound **3-Ag** is hard to re-dissolve after crystallization even in thf. Apart from that, **3-Ag** shows decomposition over time in solution at room temperature, which was monitored in the  $^{31}\text{P}\{^1\text{H}\}$  and  $^{31}\text{P}$  NMR spectrum. Therefore, the data quality for the corresponding NMR spectra are of poor quality as many species can be observed (see Figure S 19 and Figure S 20). Dissolving crystals of **3-Ag** in thf- $d_8$  at  $-80^\circ\text{C}$  and measuring an  $^1\text{H}$  NMR spectrum at  $-80^\circ\text{C}$  did not improve the spectrum quality. As the solubility of **3-Ag** at lower temperatures is very poor and in the corresponding spectrum already at  $-80^\circ\text{C}$  many signals can be observed an attribution of the signals is not possible (see Figure S 21). Presumably, in solution rearrangement processes and decomposition is present.

### 1.10 Synthesis of $[(\text{Cp}^*\text{Fe})(\text{Cp}''\text{Ni})_2(\mu_3, \eta^{3:2:2}\text{-As}_4)(\mu_3\text{-As})]$ (**2-Ni**)

$[(\text{Cp}^*\text{Fe}(\eta^5\text{-As}_5)]$  (100 mg, 0.177 mmol, 1 eq) and  $[\text{Cp}''\text{Ni}(\mu\text{-Br})_2]$  (132 mg, 0.177 mmol, 1.0 eq) were weighed in a Schlenk tube and DME (10 mL) was added. Then a suspension of  $\text{KC}_8$  (68 mg, 0.400 mmol, 2.3 eq) in DME (10 mL) was added at room temperature to afford a dark brown color change. The mixture was stirred for 3 hours at room temperature. Then the solvent was removed *in vacuo*. Then the residue was dissolved in pentane and filtered over diatomaceous earth. After removing the solvent in *vacuo*, the residue was dissolved in  $\text{CH}_2\text{Cl}_2$  and layered with  $\text{CH}_3\text{CN}$ . After storage at room temperature for a few days, **2-Ni** can be obtained as dark brown blocks. The supernatant was decanted off and the crystalline compound washed with  $\text{CH}_3\text{CN}$  (5 x 3 mL) and dried in *vacuo*.

Yield: 71 mg (0.061 mmol, 35 %).

$^1\text{H NMR}$  ( $\text{C}_6\text{D}_6$ , 293 K):  $\delta$  [ppm] = 5.47 (s, br, 2H,  $\text{C}_5\text{H}_2\text{tBu}_3$ ), 5.34 (s, br, 2H,  $\text{C}_5\text{H}_2\text{tBu}_3$ ), 1.70 (s, 18H,  $\text{C}_5\text{H}_2\text{tBu}_3$ ), 1.53 (s, 15H,  $\text{C}_5\text{Me}_5$ ), 1.52 (s, 18H,  $\text{C}_5\text{H}_2\text{tBu}_3$ ), 1.44 (s, 18H,  $\text{C}_5\text{H}_2\text{tBu}_3$ ).

LIFDI-MS (toluene):  $m/z = 1147.99$  ( $[\mathbf{2-Ni}]^+$ , 100%).

Elemental Analysis calculated (%) for  $\text{C}_{44}\text{H}_{73}\text{FeNi}_2\text{As}_5$ : C: 45.96, H: 6.40  
found [%]: C: 45.50, H: 6.19.

## 2 NMR spectroscopic investigations

### 2.1 1-Cr

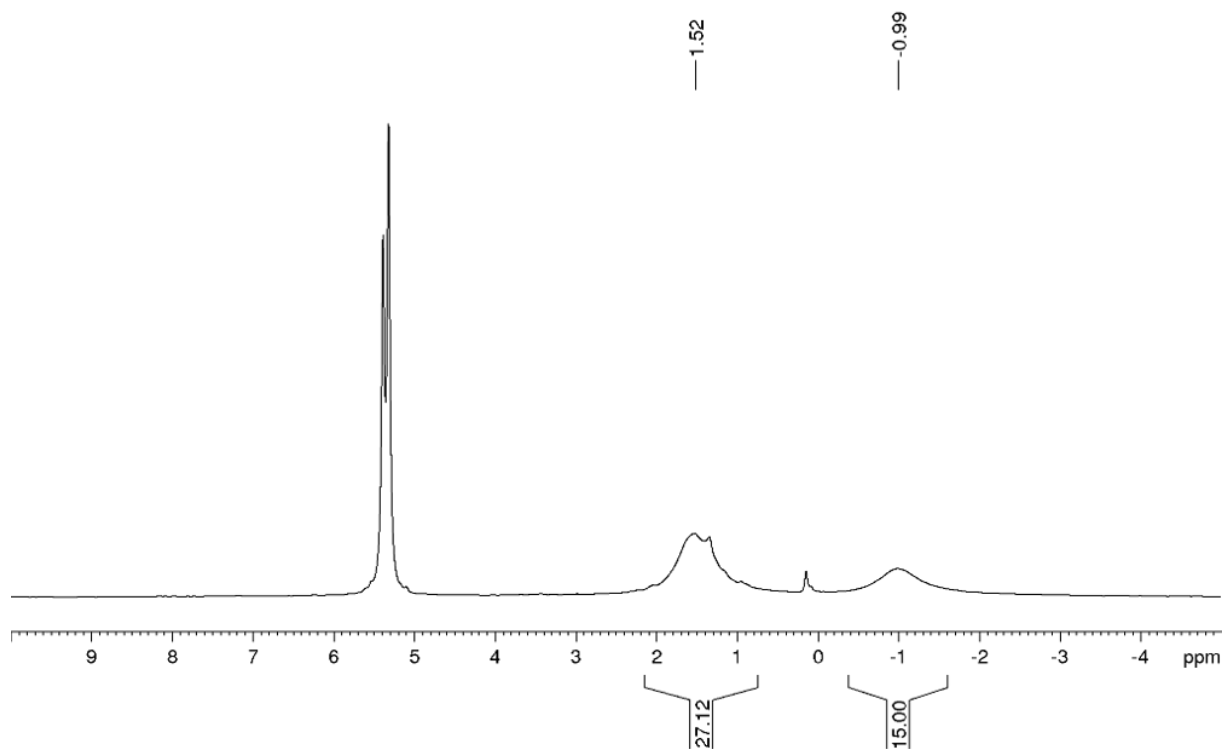

**Figure S 1.**  $^1\text{H}$  NMR spectrum for **1-Cr** in  $\text{CD}_2\text{Cl}_2$  recorded at room temperature. 8.0 mg of **1-Cr** were dissolved in 2.2 mL  $\text{CD}_2\text{Cl}_2$  and filled in an Evans NMR tube with pure  $\text{CD}_2\text{Cl}_2$  in the outer tube in order to determine the number of unpaired electrons via Evans NMR method.

## 2.2 2-Cr

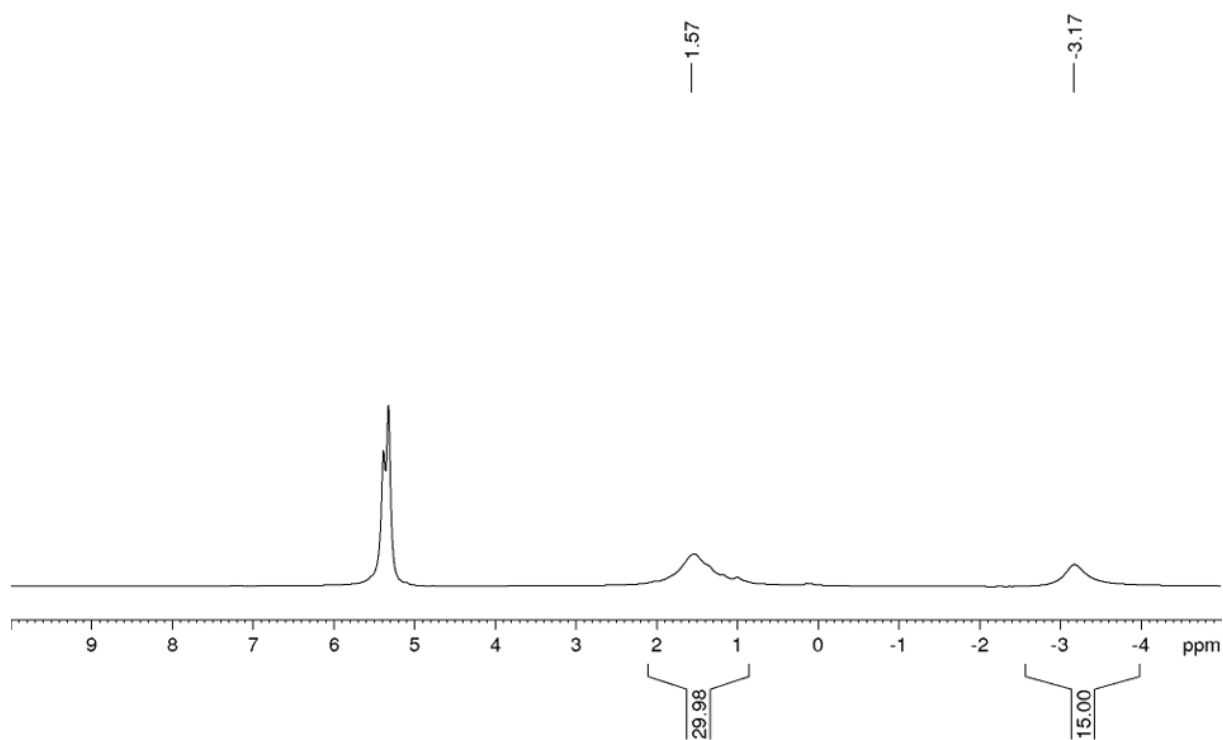

**Figure S 2.**  $^1\text{H}$  NMR spectrum for **2-Cr** in  $\text{CD}_2\text{Cl}_2$  recorded at room temperature. 10.0 mg of **2-Cr** were dissolved in 1.8 mL  $\text{CD}_2\text{Cl}_2$  and filled in an Evans NMR tube with pure  $\text{CD}_2\text{Cl}_2$  in the outer tube in order to determine the number of unpaired electrons via Evans NMR method.

## 2.3 1-Mn

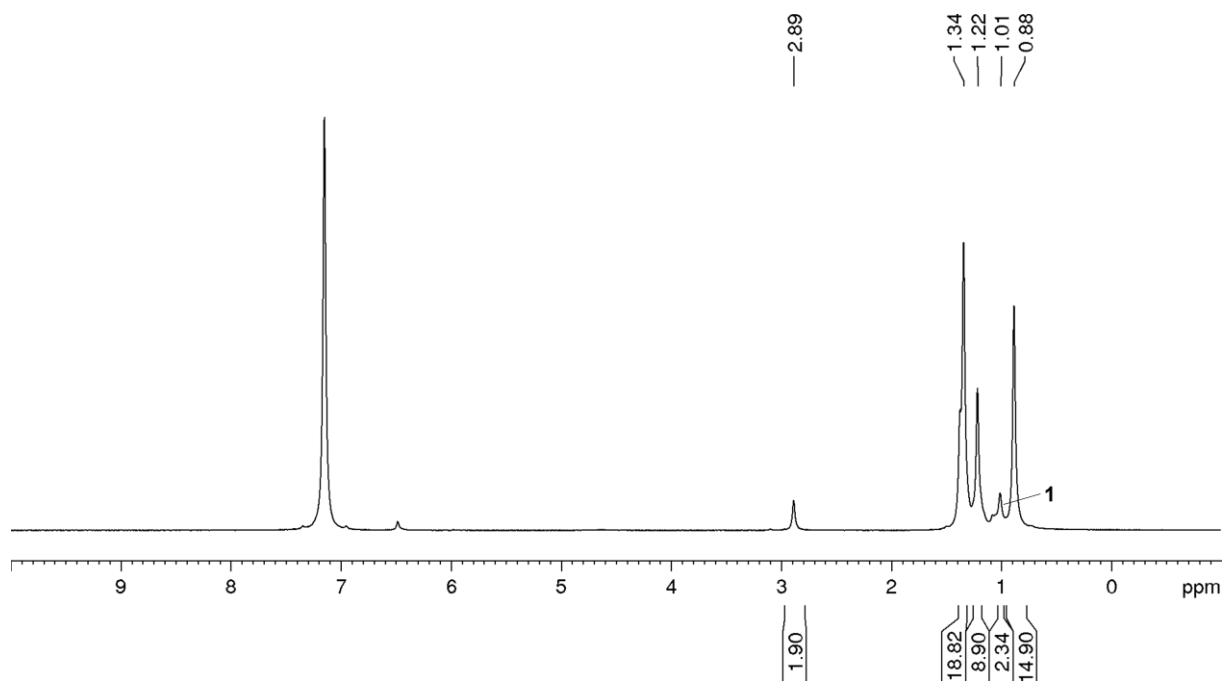

**Figure S 3.**  $^1\text{H}$  NMR spectrum for **1-Mn** in  $\text{C}_6\text{D}_6$  recorded at room temperature. Minor impurities of **1** can be observed.

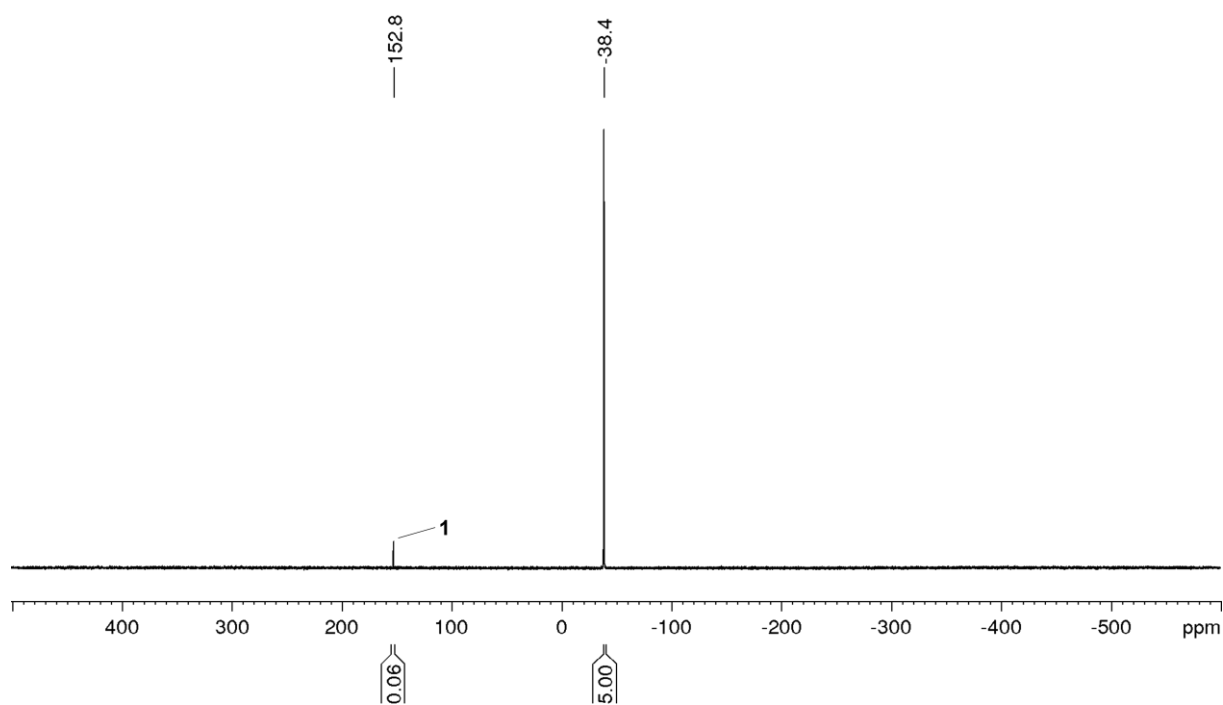

**Figure S 4.**  $^{31}\text{P}$  NMR spectrum for **1-Mn** in  $\text{C}_6\text{D}_6$  recorded at room temperature. Minor impurities of **1** can be observed.

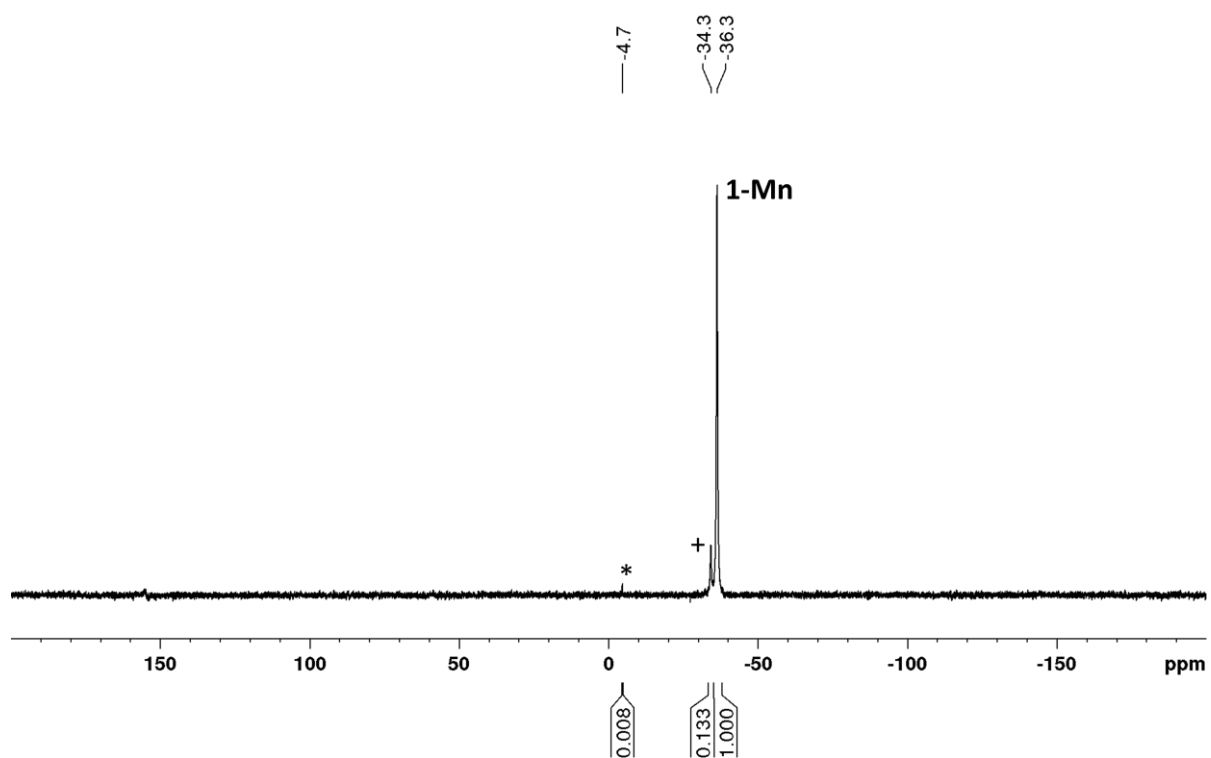

**Figure S 5.**  $^{31}\text{P}$  NMR spectrum for the reaction solution of **1-Mn** in thf with a  $\text{C}_6\text{D}_6$ -capillary and 0.02 mmol  $\text{PPh}_3$  recorded at room temperature (signal marked with \* =  $\text{PPh}_3$ , signal marked with + = unidentified by-product).



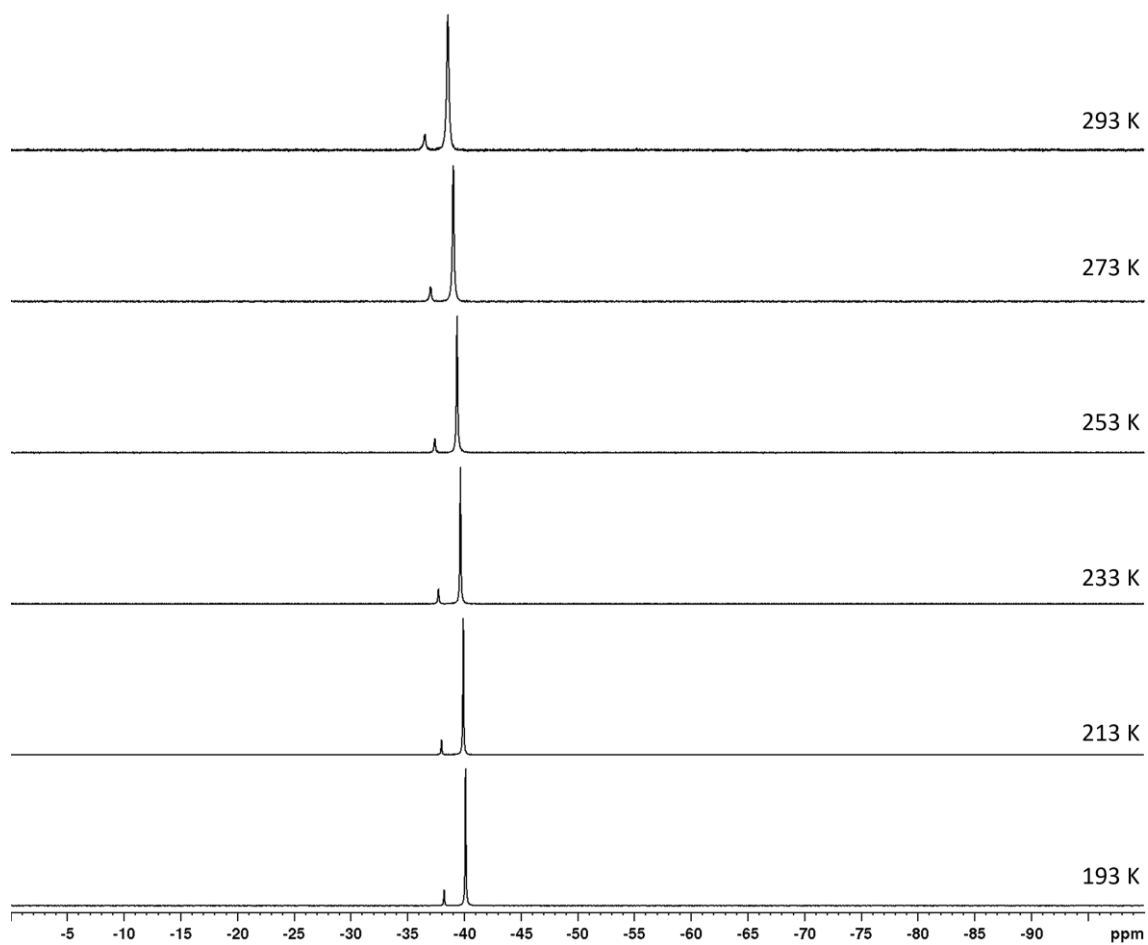

**Figure S 6.** Variable temperature  $^{31}\text{P}\{^1\text{H}\}$  NMR spectra for the reaction solution of **1-Mn** recorded in  $\text{thf-d}_8$ .

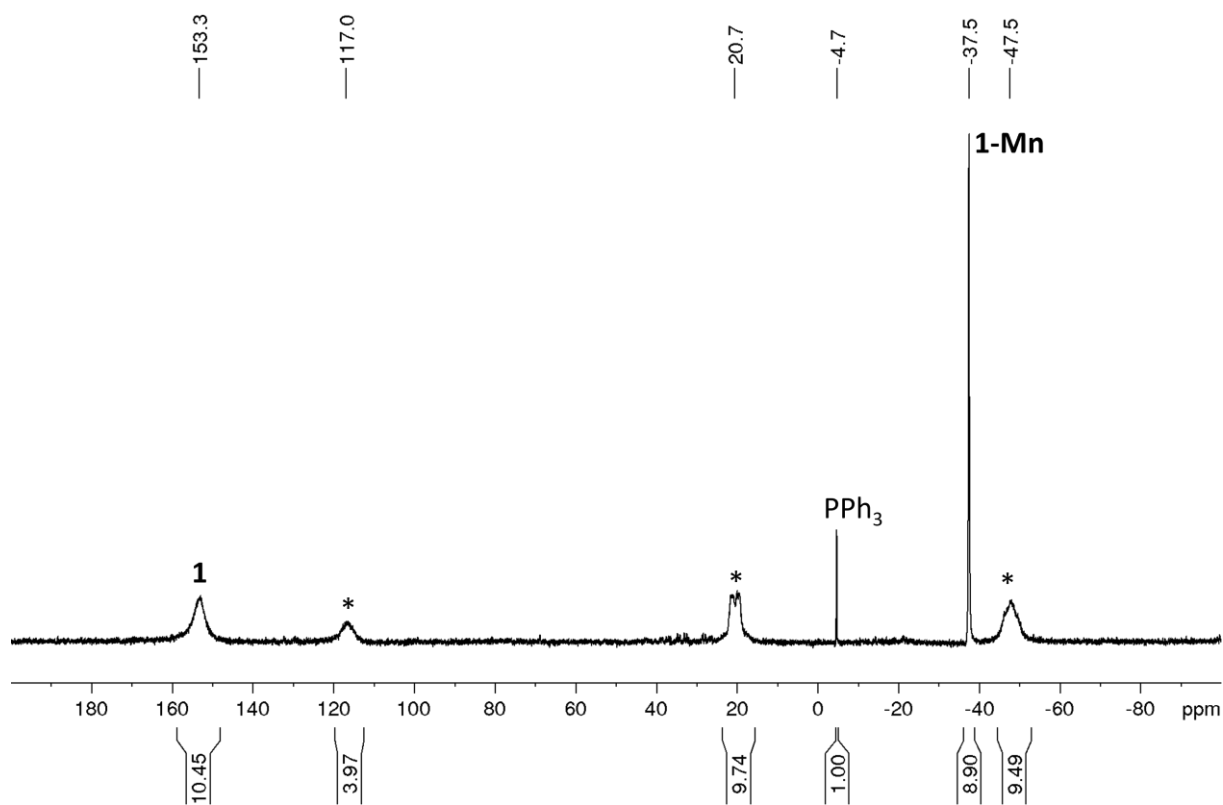

**Figure S 7.**  $^{31}\text{P}$  NMR spectrum for the reaction solution of 1.0 eq  $[\text{Cp}^*\text{Fe}(\eta^4\text{-P}_5)]^{2-}$  (0.151 mmol) and 0.5 eq  $[\text{Cp}^{**}\text{Mn}(\text{THF})(\mu\text{-I})_2]$  (0.076 mmol) in thf with a  $\text{C}_6\text{D}_6$ -capillary containing 0.016 mmol  $\text{PPh}_3$  recorded at room temperature (signal marked with \* = redox by-product =  $[(\text{Cp}^*\text{Fe})_2(\mu,\eta^4:\eta^4\text{-P}_{10})]^{2-}$ ).<sup>[2]</sup>

## 2.4 2-Mn

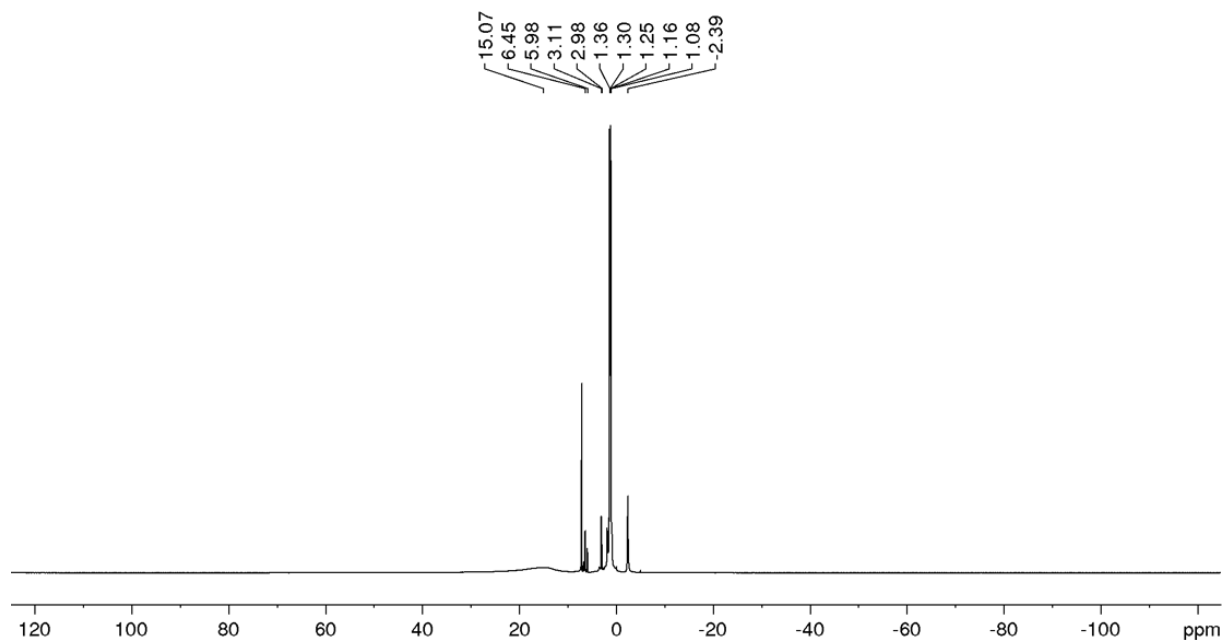

**Figure S 8.**  $^1\text{H}$  NMR spectrum for the reaction of  $[\text{Cp}^*\text{Fe}(\eta^5\text{-As}_5)]$ ,  $\text{KC}_8$  and  $[\text{Cp}^{**}\text{Mn}(\text{THF})(\mu\text{-I})_2]$  after extraction with hexane in  $\text{C}_6\text{D}_6$  recorded at room temperature. Signal at  $\delta$  [ppm] = 15.07 can be assigned to the formation of  $[(\text{Cp}^{**})_2\text{Mn}]$ .<sup>[10]</sup>

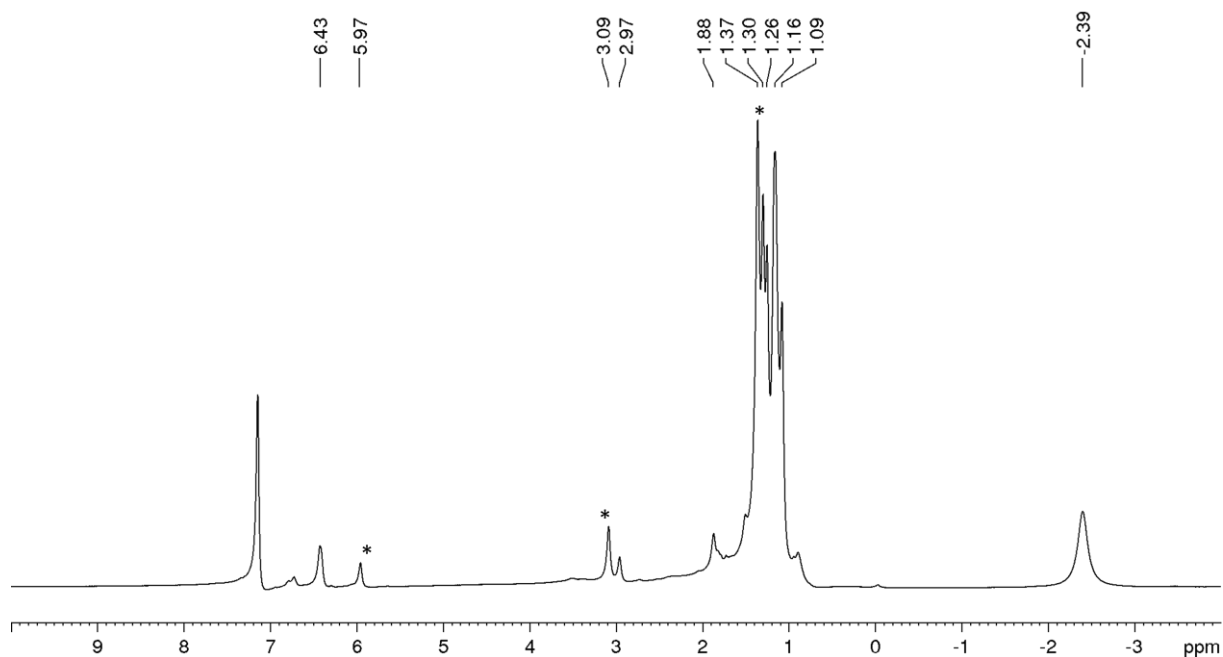

**Figure S 9.**  $^1\text{H}$  NMR spectrum for the reaction of  $[\text{Cp}^*\text{Fe}(\eta^5\text{-As}_5)]$ ,  $\text{KC}_8$  and  $[\text{Cp}^{\text{**}}\text{Mn}(\text{THF})(\mu\text{-I})_2]$  after extraction with hexane in  $\text{C}_6\text{D}_6$  recorded at room temperature. Only the area between  $\delta/\text{ppm} = 10$  ppm to  $-4$  is depicted. Signals for  $\text{HCp}^{\text{**}}$  are marked with \*.

## 2.5 1-Fe

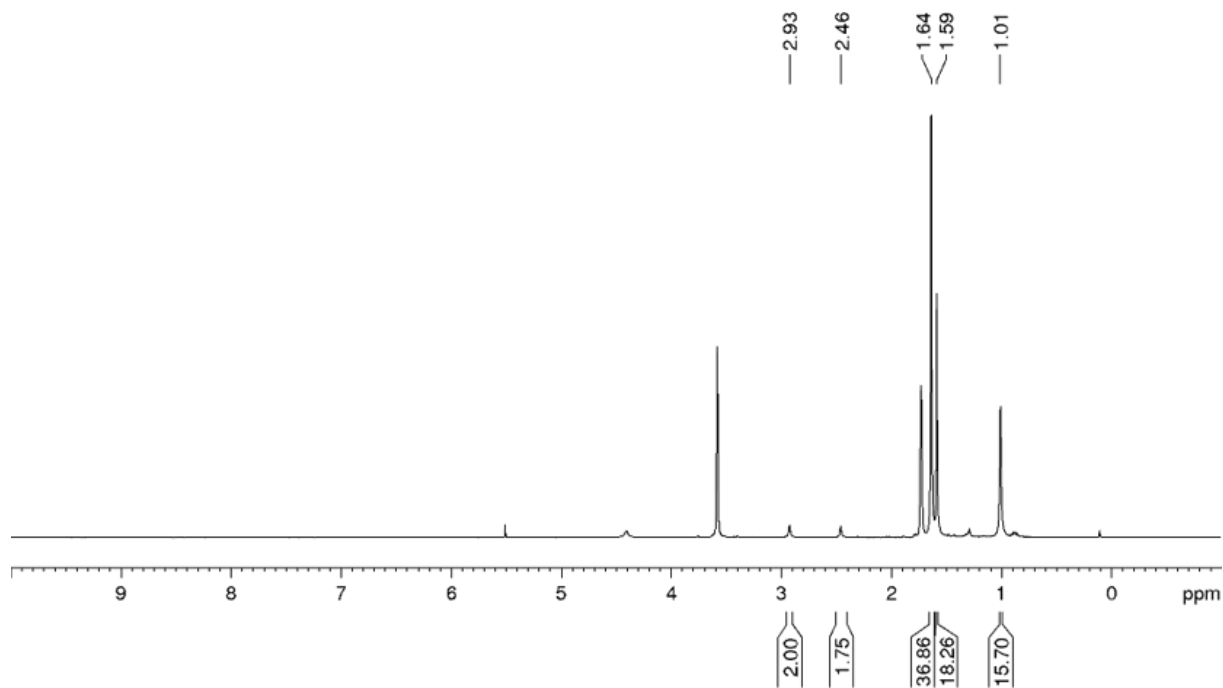

**Figure S 10.**  $^1\text{H}$  NMR spectrum for **1-Fe** in  $\text{thf-d}_8$  recorded at room temperature.

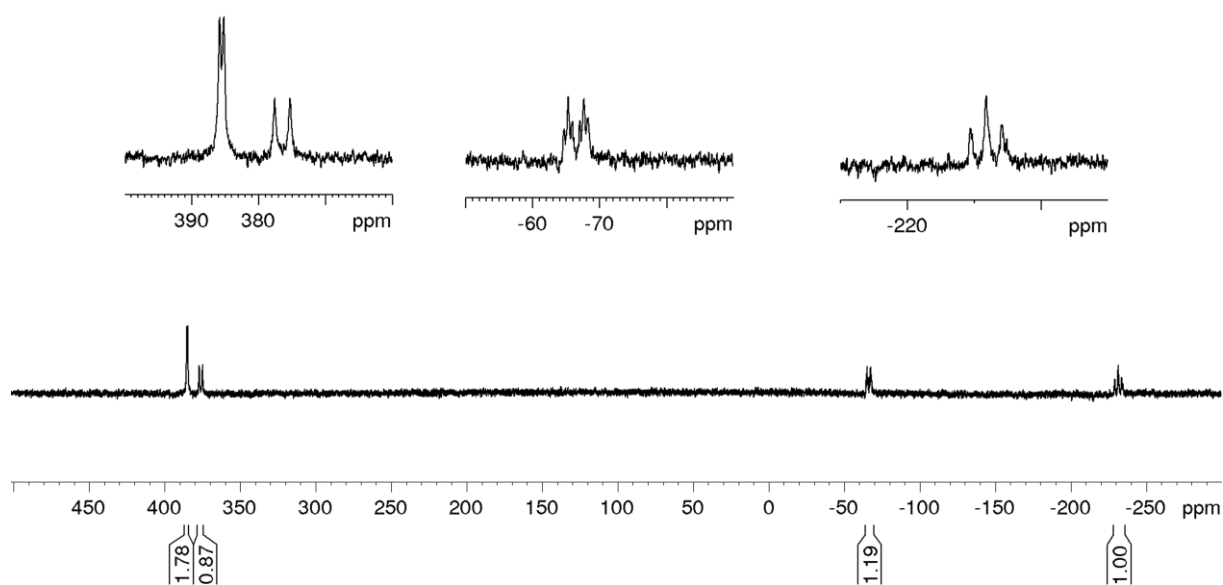

**Figure S 11.**  $^{31}\text{P}$  NMR spectrum for **1-Fe** in  $\text{thf-d}_8$  recorded at room temperature.

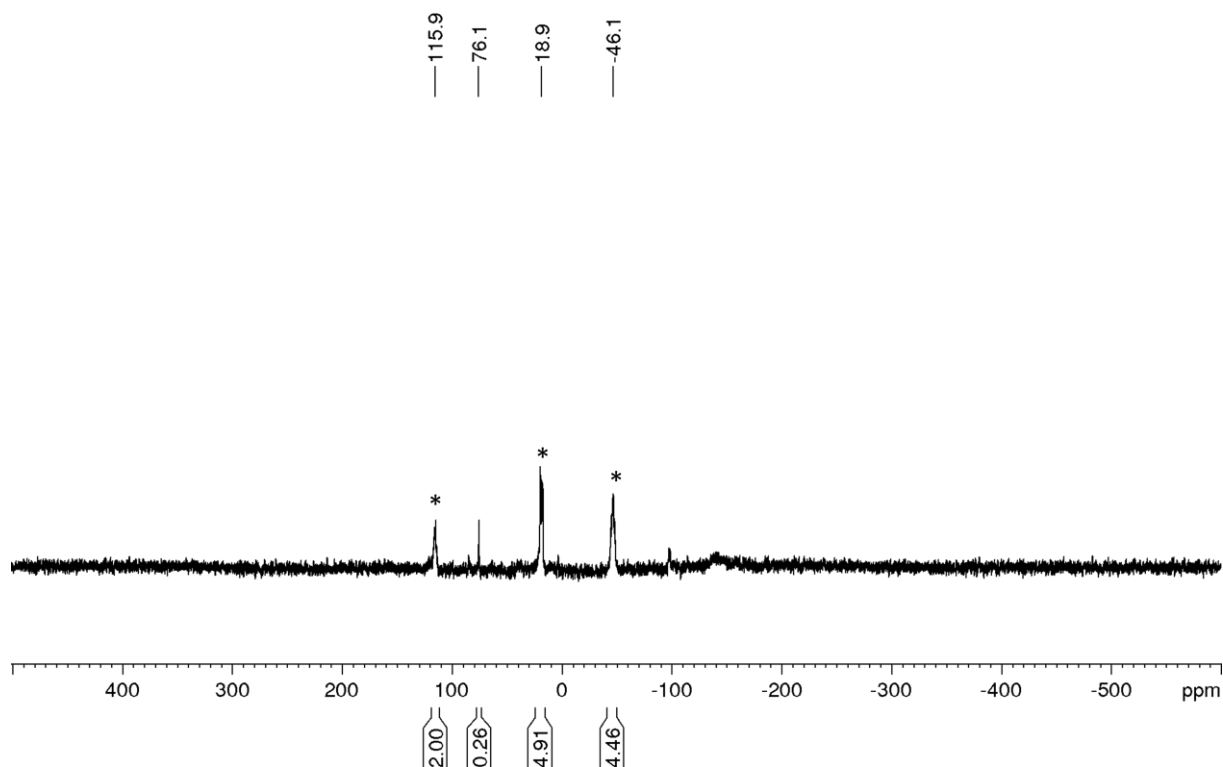

**Figure S 12.**  $^{31}\text{P}$  NMR spectrum for the reaction solution of 1.0 eq  $[\text{Cp}^*\text{Fe}(\eta^4\text{-P}_5)]^{2-}$  (0.144 mmol) and 0.5 eq  $[\text{Cp}^{**}\text{Fe}(\mu\text{-Br})_2]$  (0.072 mmol) in  $\text{dme}$  with a  $\text{C}_6\text{D}_6$ -capillary recorded at room temperature (signal marked with \* = redox product =  $[(\text{Cp}^*\text{Fe})_2(\mu, \eta^4\text{-P}_{10})]^{2-}$ ).<sup>[2]</sup>

## 2.6 2-Fe

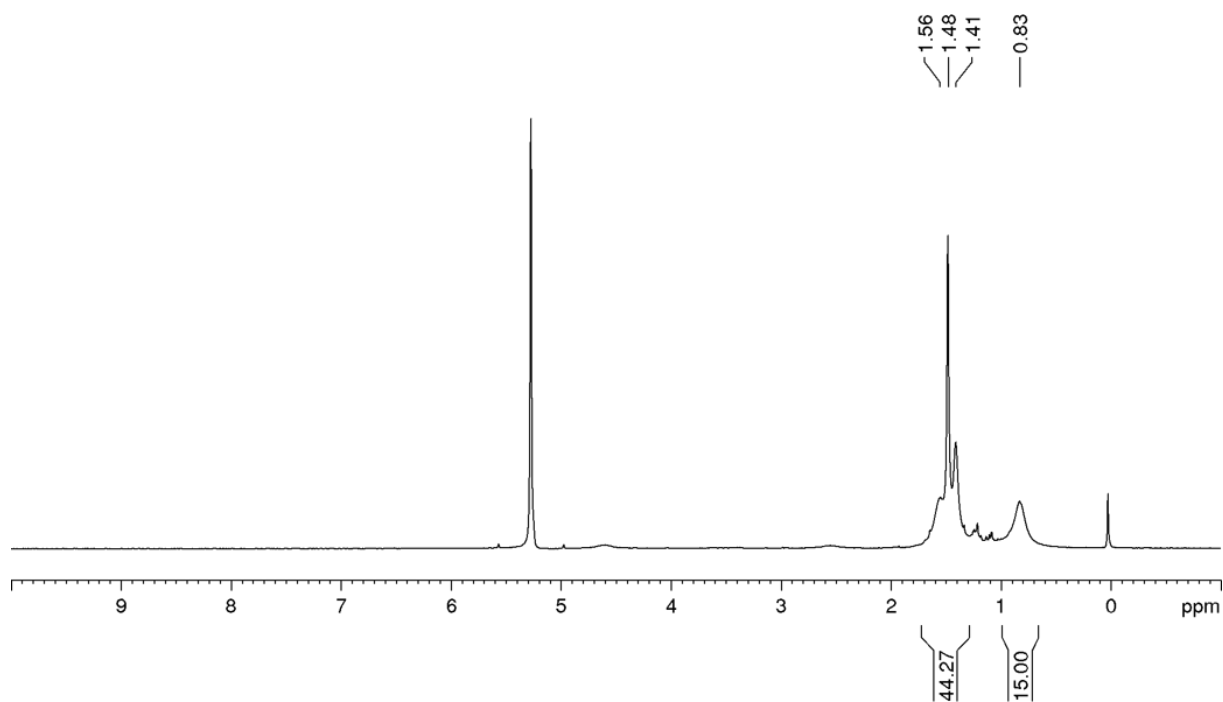

Figure S 13. <sup>1</sup>H NMR spectrum for 2-Fe in CD<sub>2</sub>Cl<sub>2</sub> recorded at room temperature.

## 2.7 1-Ni

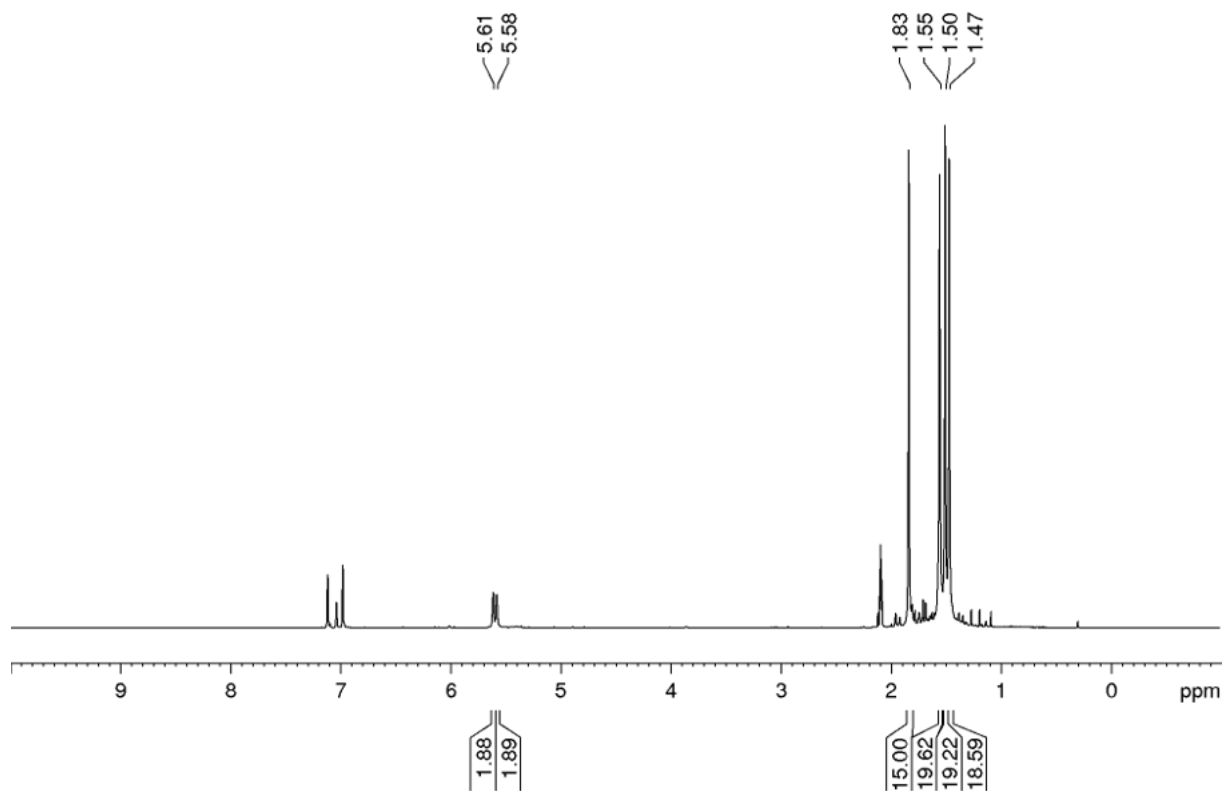

Figure S 14. <sup>1</sup>H NMR spectrum for 1-Ni in tol-d<sub>8</sub> recorded at 253 K.

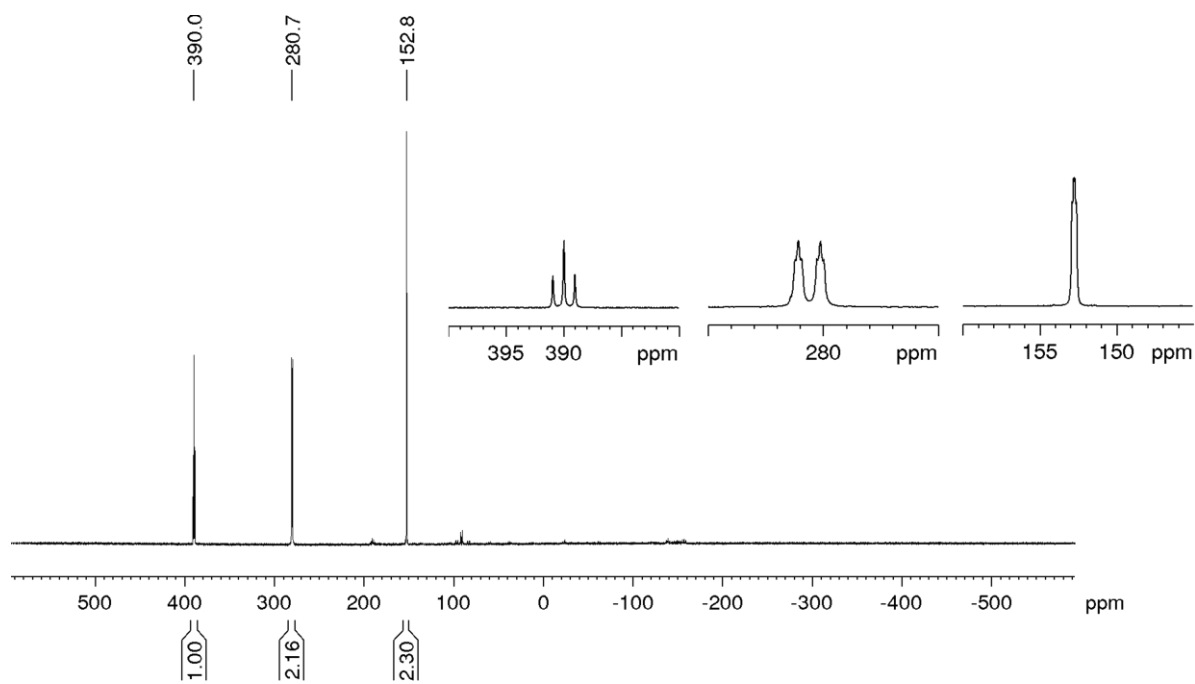

**Figure S 15.**  $^{31}\text{P}$  NMR spectrum for **1-Ni** in  $\text{tol-d}_8$  recorded at 253 K.

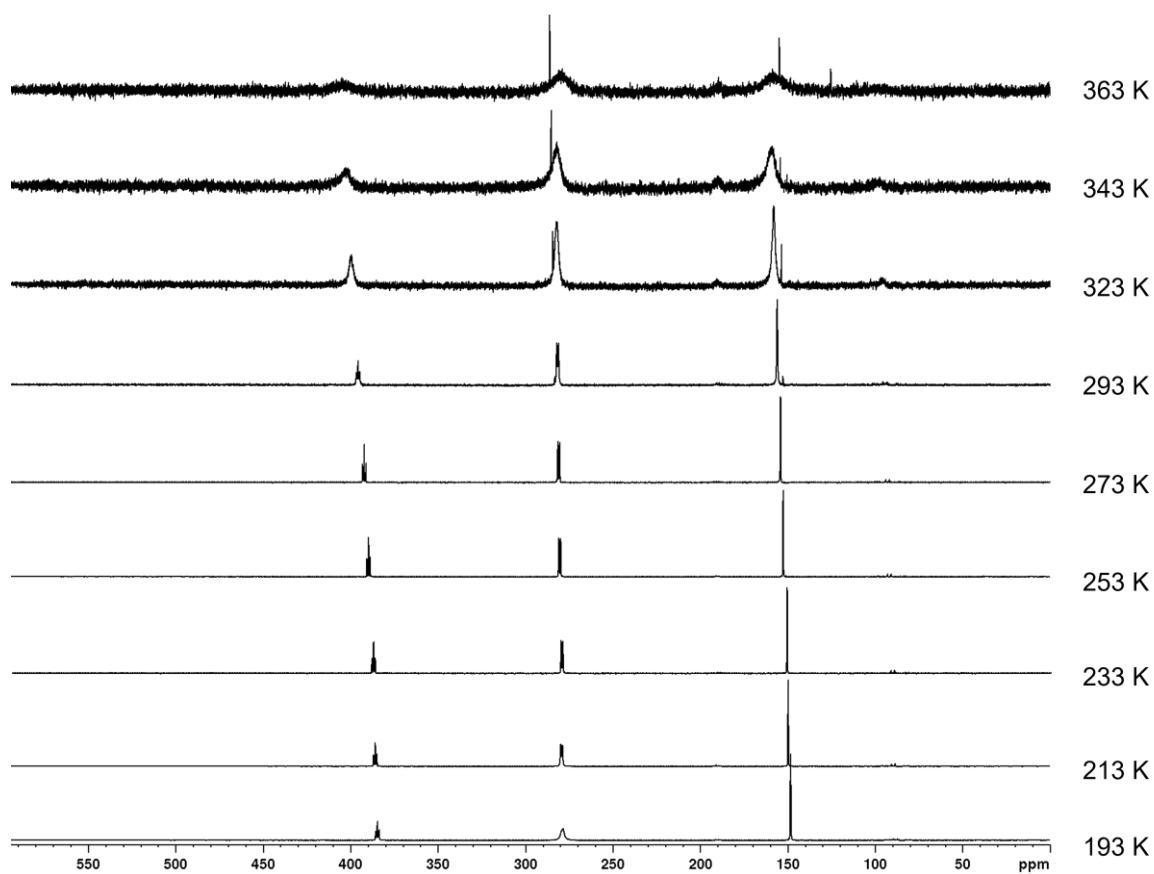

**Figure S 16.** Variable temperature  $^{31}\text{P}$  NMR spectra for **1-Ni** recorded in  $\text{thf-d}_8$ .

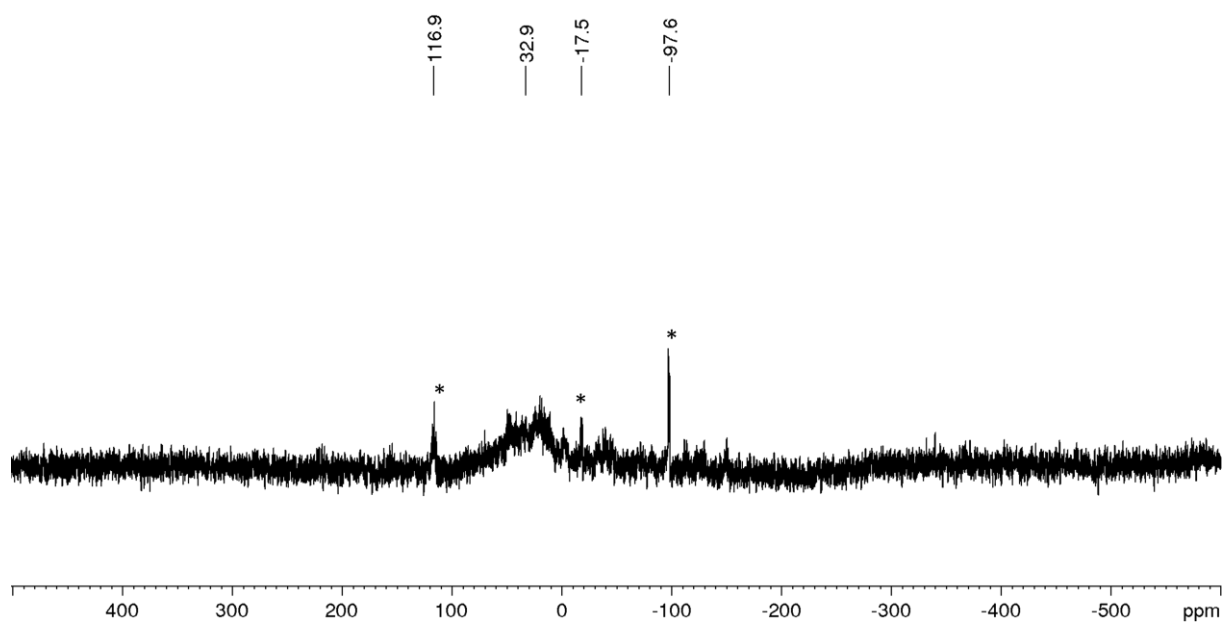

**Figure S 17.**  $^{31}\text{P}\{^1\text{H}\}$  NMR spectrum for the reaction solution of 1.0 eq  $[\text{Cp}^*\text{Fe}(\eta^4\text{-P}_5)]^{2-}$  (0.578 mmol) and 0.5 eq  $[\text{Cp}^*\text{Ni}(\mu\text{-Br})_2]$  (0.289 mmol) in DME with a  $\text{C}_6\text{D}_6$ -capillary recorded at room temperature (signal marked with \* = redox product =  $[(\text{Cp}^*\text{Fe})_2(\mu,\eta^4:\eta^4\text{-P}_{10})]^{2-}$ ).<sup>[2]</sup>

## 2.8 2-Ni

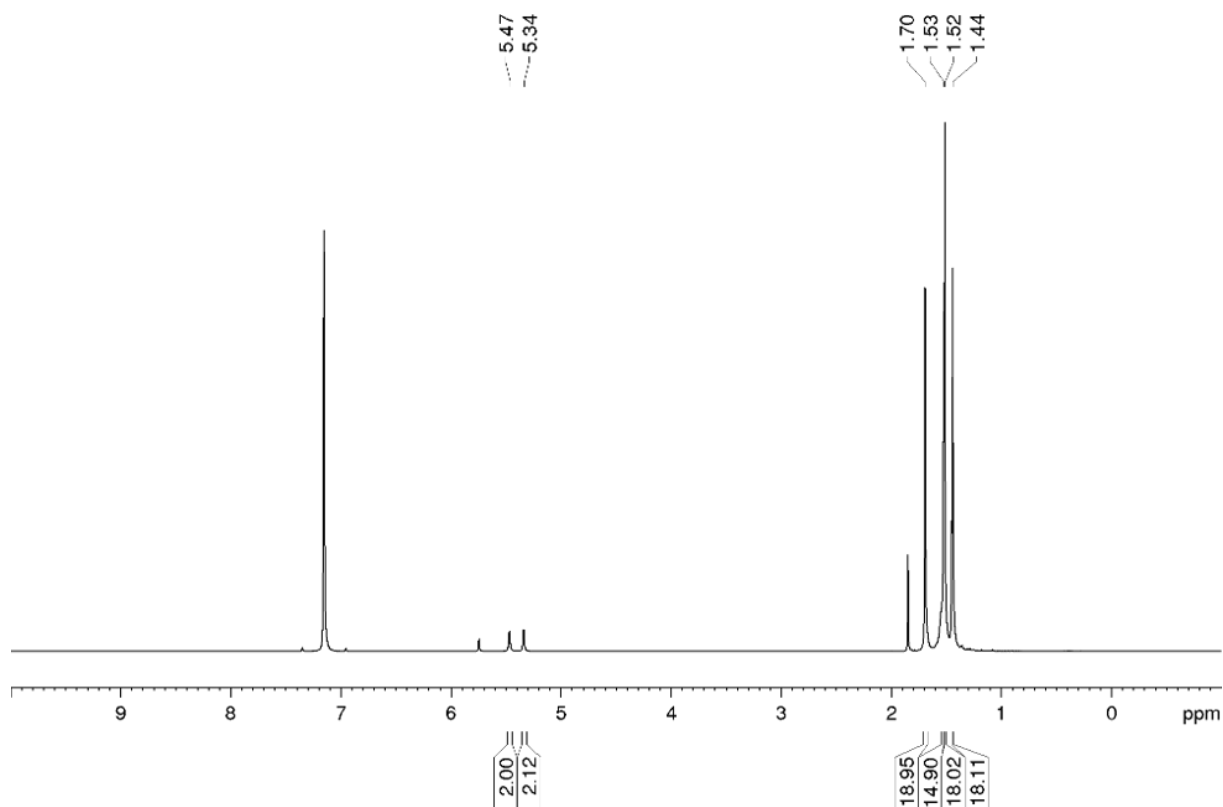

**Figure S 18.**  $^1\text{H}$  NMR spectrum for 2-Ni in  $\text{C}_6\text{D}_6$  recorded at room temperature.

## 2.9 3-Ag

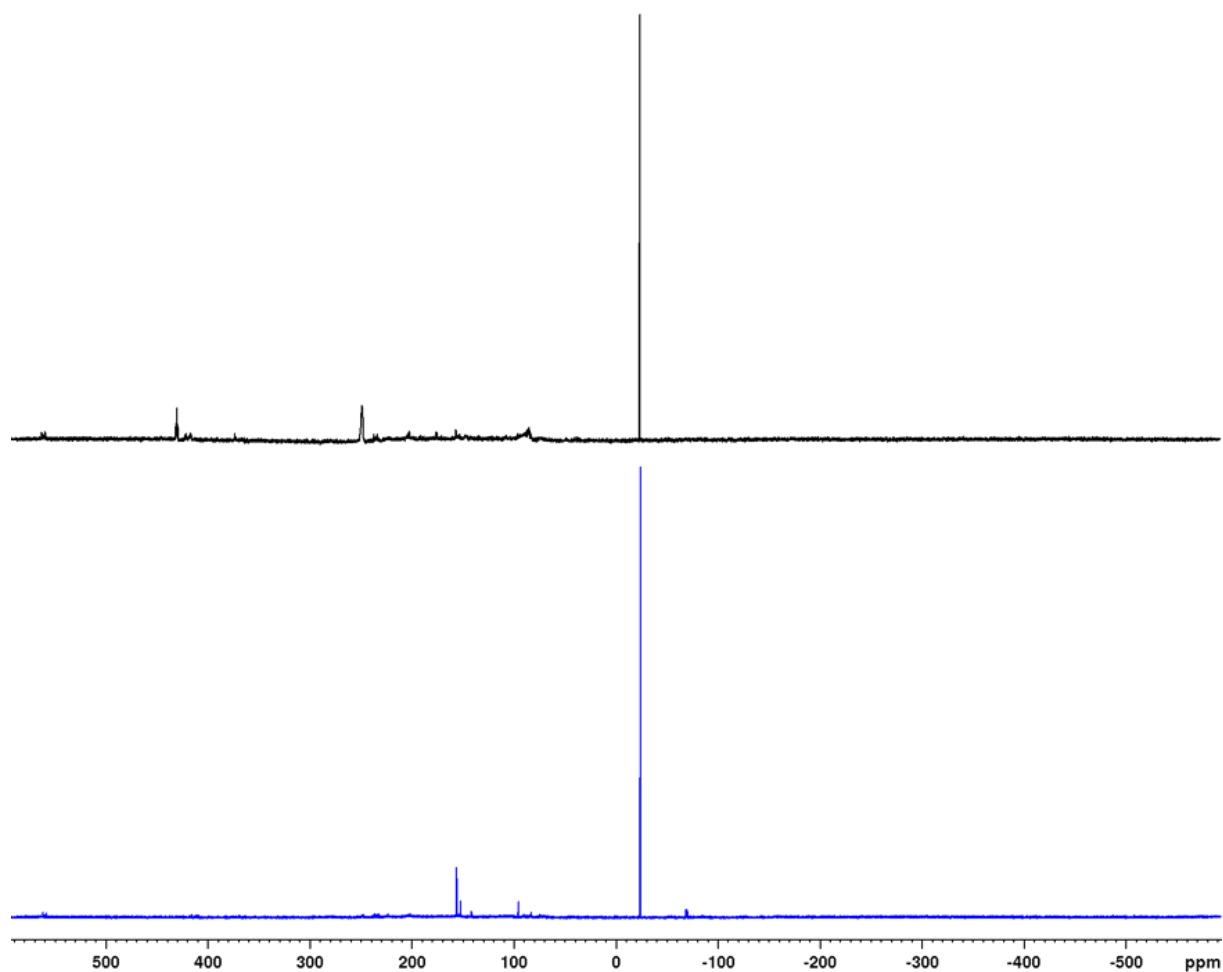

**Figure S 19.**  $^{31}\text{P}\{^1\text{H}\}$  (top, black) and  $^{31}\text{P}$  (bottom, blue) NMR spectra for **3-Ag** in  $\text{thf-d}_8$  recorded at 273 K. The signal at  $\delta = -22$  ppm is attributed to an impurity. The signals at  $\delta/\text{ppm} = 430.6, 249.1$  and  $86.6$  in the  $^{31}\text{P}\{^1\text{H}\}$  NMR spectrum are assigned to the complex **3-Ag**. Upon measurement of the  $^{31}\text{P}$  NMR spectrum of the same sample already changes in the spectrum can be observed within a few hours.

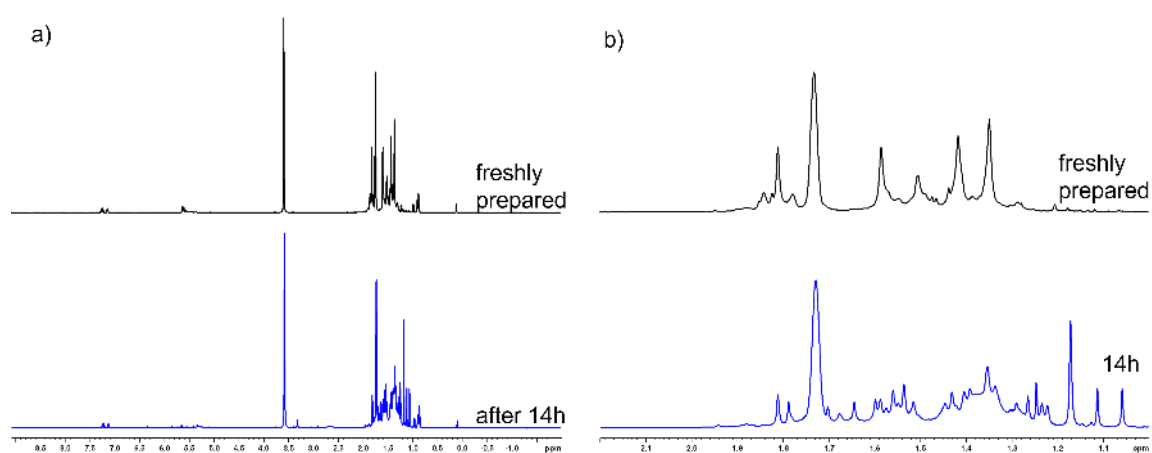

**Figure S 20.** a)  $^1\text{H}$  NMR spectra for **3-Ag** in  $\text{thf-d}_8$  recorded at 273 K of a freshly prepared sample (top, black) and after 14h (bottom, blue); b) zoom for a better view in the aliphatic C-H region.



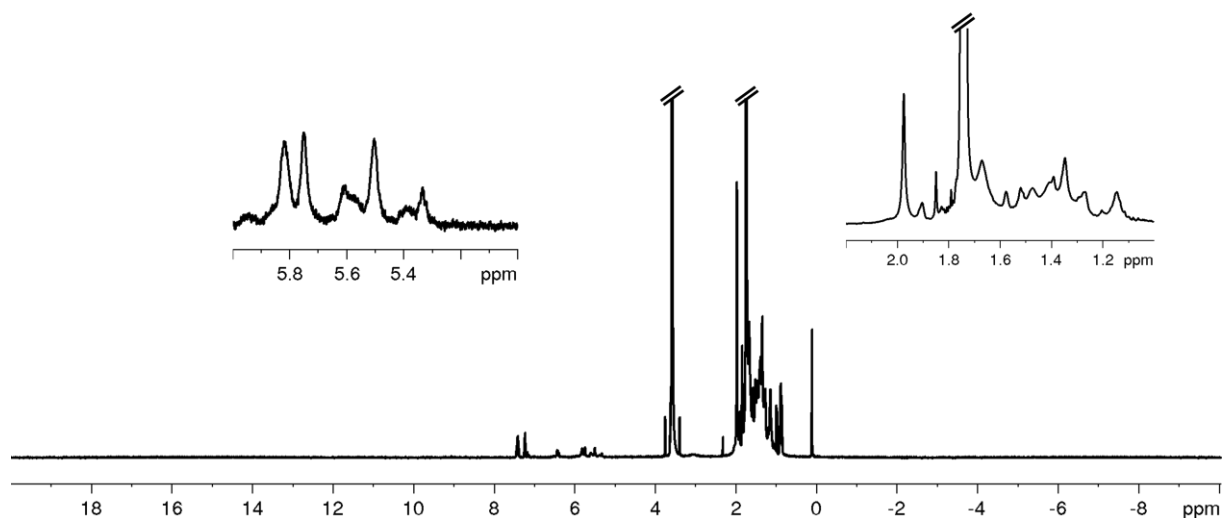

**Figure S 21.**  $^1\text{H}$  NMR spectrum for **3-Ag** in  $\text{THF-d}_8$  recorded at 193 K. The sample was freshly prepared and dissolved at 193 K prior to the measurement.

## 2.10 Syntheses starting from $[\text{K}(\text{dme})_2][\text{Cp}^*\text{Fe}(\eta^4\text{-P}_5)]$

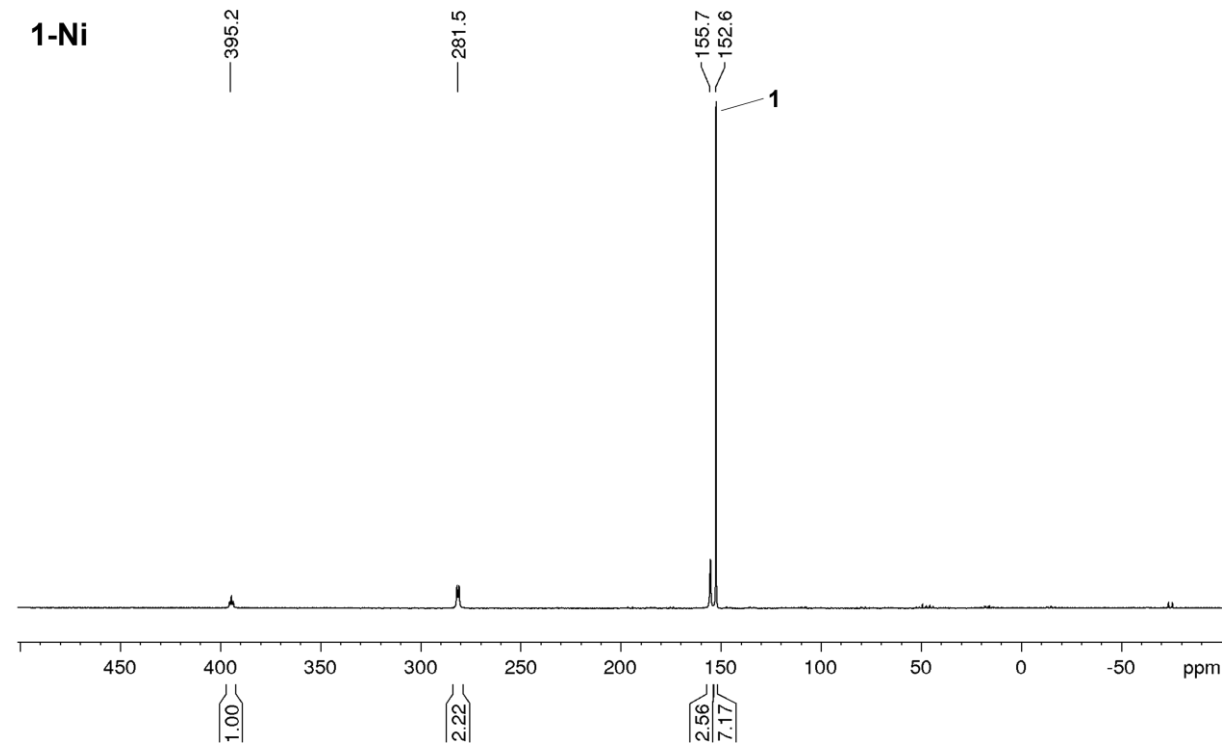

**Figure S 22.** Experimental  $^{31}\text{P}\{^1\text{H}\}$  NMR spectrum ( $\text{dme}[\text{C}_6\text{D}_6]$  capillary) for the reaction mixture of  $[\text{K}(\text{dme})_2][\text{Cp}^*\text{Fe}(\eta^4\text{-P}_5)]$  with  $[\text{Cp}^*\text{Ni}(\mu\text{-Br})_2]$  recorded at room temperature.

1-Cr

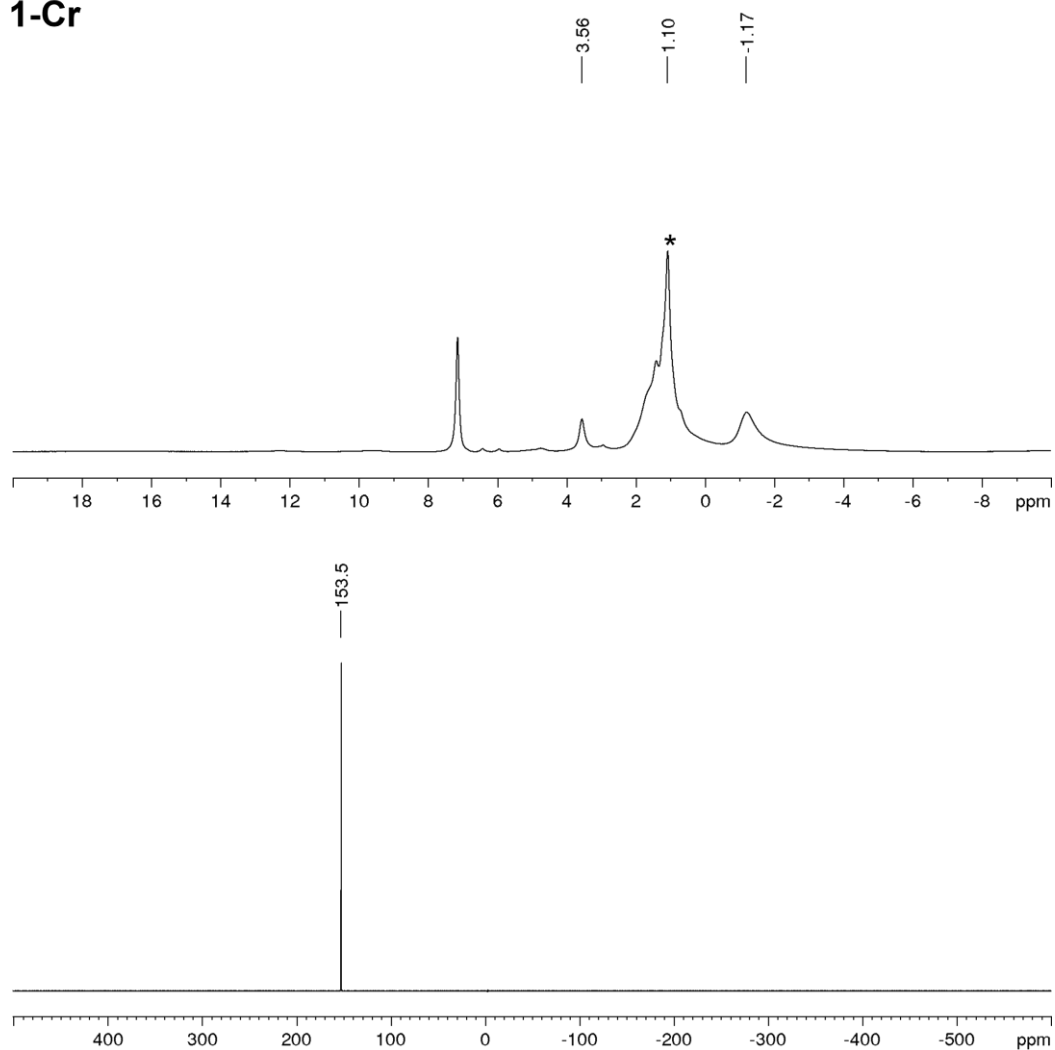

**Figure S 23.** Experimental  $^1\text{H}$  (top) and  $^{31}\text{P}$  (bottom) NMR spectrum ( $\text{C}_6\text{D}_6$ ) for the reaction mixture of  $[\text{K}(\text{dme})_2]_2[\text{Cp}^*\text{Fe}(\eta^4\text{-P}_5)]$  with  $[\text{Cp}^{**}\text{Cr}(\mu\text{-Cl})]_2$  recorded at room temperature. Signal marked with \* corresponds to **1**.

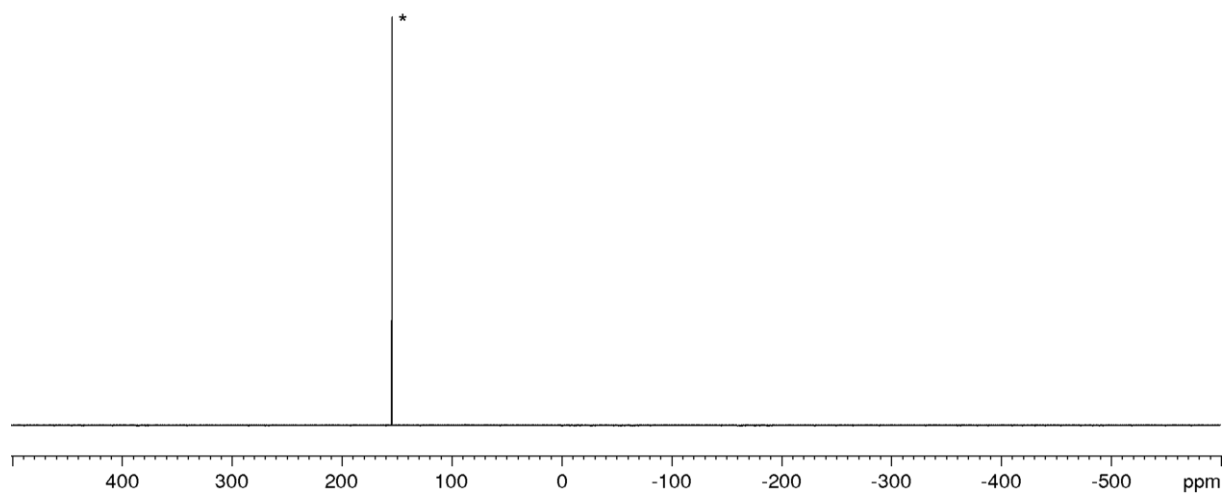

**Figure S 24.** Experimental  $^{31}\text{P}$  NMR spectrum ( $\text{C}_6\text{D}_6$ ) for the reaction mixture of  $[\text{K}(\text{dme})_2]_2[\text{Cp}^*\text{Fe}(\eta^4\text{-P}_5)]$  with  $[\text{Cp}^{**}\text{Fe}(\mu\text{-Br})]_2$  recorded at room temperature. Signal marked with \* corresponds to **1**. No signals for **1-Fe** observed.

### 3 EPR studies

#### 3.1 1-Cr

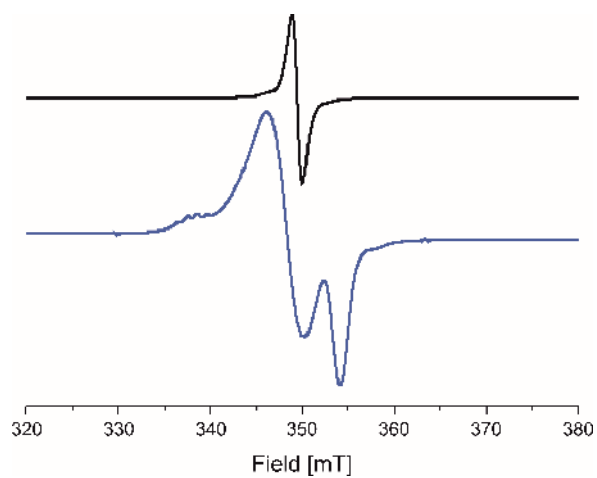

**Figure S25.** X-band EPR spectrum for **1-Cr** in thf solution at 298 K (black, top) or at 77 K (blue, bottom).  $g$  value for the sample at 298 K:  $g_{iso} = 1.918$ .

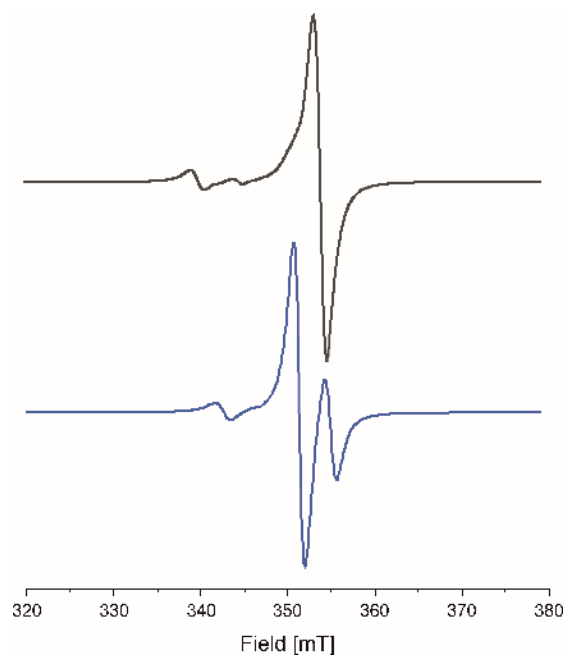

**Figure S 26.** X-band EPR spectrum for **1-Cr** in solid state at 298 K (black, top) or at 77 K (blue, bottom).

### 3.2 2-Cr

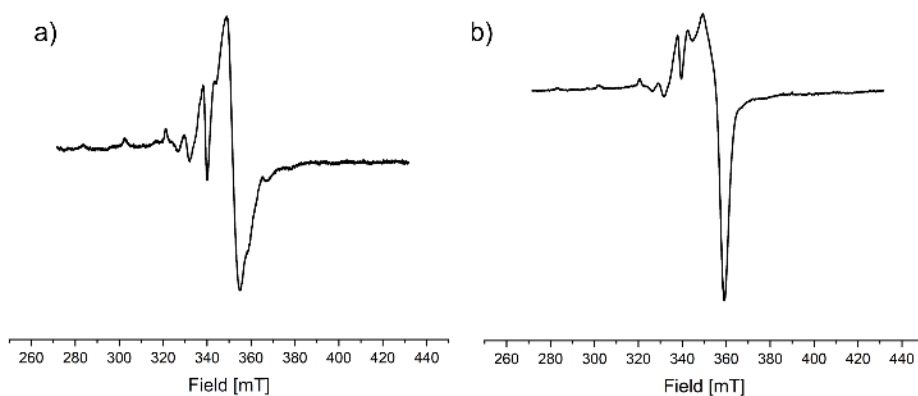

Figure S 27. X-band EPR spectrum for 2-Cr in thf solution at 298 K (a) and 77 K (b).

### 3.3 Impurities within 1-Fe and 2-Fe

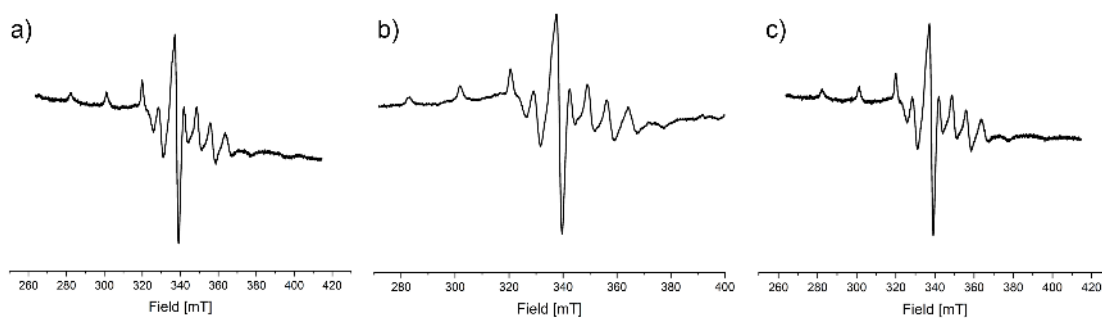

Figure S 28. Comparison of X-band EPR spectra for samples of (a) 1-Fe (thf solution of crystals at 77 K, using 1.0 eq [Cp'''Fe(μ-Br)<sub>2</sub>]), (b) 2-Fe (crystals at 77 K, using 1.0 eq [Cp'''Fe(μ-Br)<sub>2</sub>]) with (c) solid [Cp'''Fe(μ-Br)<sub>2</sub>] at 77 K.

#### 4 Details on single crystal X-ray structure analysis

The X-ray diffraction experiments were performed on either a Xcalibur, AtlasS2, Gemini ultra (**2-Ni**) or GV1000 TitanS2 (**3-Ag**) diffractometer applying Cu- $K_{\alpha}$  radiation ( $\lambda = 1.54178 \text{ \AA}$ ) or using a XtaLAB Synergy R, DW System with a HyPix-Arc 150 detector using Cu- $K_{\alpha}$  radiation from a rotating anode (**1-Cr, 2-Cr, 1-Mn, 1-Fe, 2-Fe, 2-Ni**). All measurements were performed at 123 K, except for **1-Mn** (100 K). Data collection and reduction were performed with CrysAlisPro 1.171.40.14a (**3-Ag**), CrysAlisPro 1.171.41.83a (**1-Mn**) or 171.43.36a (**1-Cr, 2-Cr, 1-Mn, 1-Fe, 2-Fe, 2-Ni**). For the compounds (**1-Cr, 2-Cr, 1-Fe, 2-Fe, 2-Ni, 3-Ag**) a numeric absorption correction based on gaussian integration over a multifaceted crystal model was used. All structures were solved by direct methods with ShelXT<sup>[11]</sup> and Olex2<sup>[12]</sup> and refined by full-matrix least-squares method against  $F^2$  in anisotropic approximation using ShelXL.<sup>[11]</sup> All non-hydrogen atoms were refined anisotropically. Hydrogen atoms were refined in calculated positions riding on pivot atom model for all compounds. Visualisation of the crystal structures was performed with Olex2 (1.3alpha).<sup>[12]</sup>

CCDC-2347421 (**1-Cr**), CCDC-2347422 (**2-Cr**), CCDC-2347423 (**1-Mn**), CCDC-2347424 (**1-Fe**), CCDC-2347425 (**2-Fe**) CCDC-2347426 (**2-Ni**) and CCDC-2347427 (**3-Ag**) contain the supplementary crystallographic data for this paper. These data can be obtained free of charge at [www.ccdc.cam.ac.uk/conts/retrieving.html](http://www.ccdc.cam.ac.uk/conts/retrieving.html) (or from the Cambridge Crystallographic Data Centre, 12 Union Road, Cambridge CB2 1EZ, UK; Fax: + 44-1223-336-033; e-mail: [deposit@ccdc.cam.ac.uk](mailto:deposit@ccdc.cam.ac.uk)).

## 4.1 Crystallographic information

**Table S1.** Crystallographic data for all compounds.

|                                                | 1-Cr                                               | 2-Cr                                                              | 1-Mn                                               | 1-Fe                                                           |
|------------------------------------------------|----------------------------------------------------|-------------------------------------------------------------------|----------------------------------------------------|----------------------------------------------------------------|
| CCDC                                           | 2347421                                            | 2347422                                                           | 2347423                                            | 2347424                                                        |
| Formula                                        | C <sub>27</sub> H <sub>44</sub> FeCrP <sub>5</sub> | C <sub>44</sub> H <sub>73</sub> FeCr <sub>2</sub> As <sub>5</sub> | C <sub>27</sub> H <sub>44</sub> FeMnP <sub>5</sub> | C <sub>44</sub> H <sub>73</sub> Fe <sub>3</sub> P <sub>5</sub> |
| <i>D</i> <sub>calc.</sub> / g cm <sup>-3</sup> | 1.393                                              | 1.607                                                             | 1.405                                              | 1.358                                                          |
| $\mu$ /mm <sup>-1</sup>                        | 9.454                                              | 10.306                                                            | 9.935                                              | 9.500                                                          |
| Formula Weight                                 | 631.32                                             | 1136.47                                                           | 634.26                                             | 924.42                                                         |
| Colour                                         | Dark red                                           | Light green blue                                                  | Brownish green                                     | Dark brown                                                     |
| Shape                                          | Block shaped                                       | Block shaped                                                      | Plate shaped                                       | Block shaped                                                   |
| Size/mm <sup>3</sup>                           | 0.42 x 0.27 x 0.21                                 | 0.46 x 0.13 x 0.11                                                | 0.26 x 0.23 x 0.12                                 | 0.13 x 0.10 x 0.05                                             |
| <i>T</i> /K                                    | 123.01(10)                                         | 123.00(10)                                                        | 100.00(10)                                         | 123.00(10)                                                     |
| Crystal System                                 | Monoclinic                                         | Monoclinic                                                        | Monoclinic                                         | Monoclinic                                                     |
| Space Group                                    | <i>P</i> 2 <sub>1</sub> / <i>n</i>                 | <i>P</i> 2 <sub>1</sub> / <i>n</i>                                | <i>P</i> 2 <sub>1</sub> / <i>n</i>                 | <i>P</i> 2 <sub>1</sub> / <i>n</i>                             |
| <i>a</i> /Å                                    | 12.1473(10)                                        | 19.5158(2)                                                        | 12.14780(10)                                       | 19.23420(10)                                                   |
| <i>b</i> /Å                                    | 13.60100(10)                                       | 10.89260(10)                                                      | 13.55300(10)                                       | 10.87860(10)                                                   |
| <i>c</i> /Å                                    | 18.5936(2)                                         | 22.9447(2)                                                        | 18.5913(2)                                         | 22.55640(10)                                                   |
| $\alpha$ /°                                    | 90                                                 | 90                                                                | 90                                                 | 90                                                             |
| $\beta$ /°                                     | 101.4680(10)                                       | 105.5730(10)                                                      | 101.6500(10)                                       | 106.6420(10)                                                   |
| $\gamma$ /°                                    | 90                                                 | 90                                                                | 90                                                 | 90                                                             |
| <i>V</i> /Å <sup>3</sup>                       | 3010.62(5)                                         | 4698.47(8)                                                        | 2997.80(5)                                         | 4522.03(6)                                                     |
| <i>Z</i>                                       | 4                                                  | 4                                                                 | 4                                                  | 4                                                              |
| <i>Z'</i>                                      | 1                                                  | 1                                                                 | 1                                                  | 1                                                              |
| Wavelength/Å                                   | 1.54184                                            | 1.54184                                                           | 1.54184                                            | 1.54184                                                        |
| Radiation type                                 | Cu K $\alpha$                                      | Cu K $\alpha$                                                     | Cu K $\alpha$                                      | Cu K $\alpha$                                                  |
| $\theta$ <sub>min</sub> /°                     | 4.011                                              | 2.645                                                             | 4.007                                              | 2.669                                                          |
| $\theta$ <sub>max</sub> /°                     | 74.178                                             | 71.657                                                            | 75.220                                             | 75.254                                                         |
| Measured Refl.                                 | 61137                                              | 39500                                                             | 59246                                              | 39583                                                          |
| Independent Refl.                              | 5942                                               | 8904                                                              | 6140                                               | 8917                                                           |
| Reflections with <i>I</i> > 2( <i>I</i> )      | 5673                                               | 8450                                                              | 5702                                               | 8333                                                           |
| <i>R</i> <sub>int</sub>                        | 0.0496                                             | 0.0283                                                            | 0.0573                                             | 0.0229                                                         |
| Parameters                                     | 321                                                | 492                                                               | 321                                                | 492                                                            |
| Restraints                                     | 0                                                  | 0                                                                 | 0                                                  | 0                                                              |
| Largest Peak                                   | 0.621                                              | 0.580                                                             | 0.558                                              | 0.365                                                          |
| Deepest Hole                                   | -0.626                                             | -0.654                                                            | -0.471                                             | -0.308                                                         |
| Goof                                           | 1.026                                              | 1.059                                                             | 1.056                                              | 1.080                                                          |
| <i>wR</i> <sub>2</sub> (all data)              | 0.0908                                             | 0.0725                                                            | 0.0962                                             | 0.0617                                                         |
| <i>wR</i> <sub>2</sub>                         | 0.0900                                             | 0.0717                                                            | 0.0939                                             | 0.0609                                                         |
| <i>R</i> <sub>1</sub> (all data)               | 0.0328                                             | 0.0296                                                            | 0.0376                                             | 0.0254                                                         |
| <i>R</i> <sub>1</sub>                          | 0.0318                                             | 0.0278                                                            | 0.0345                                             | 0.0231                                                         |

|                             | 2-Fe                                                            | 3-Ag                                                                                                | 2-Ni                                                              |
|-----------------------------|-----------------------------------------------------------------|-----------------------------------------------------------------------------------------------------|-------------------------------------------------------------------|
| CCDC                        | 2347425                                                         | 2347427                                                                                             | 2347426                                                           |
| Formula                     | C <sub>44</sub> H <sub>73</sub> Fe <sub>3</sub> As <sub>5</sub> | C <sub>80</sub> H <sub>73</sub> FeNi <sub>2</sub> P <sub>5</sub> AgAlF <sub>46</sub> O <sub>3</sub> | C <sub>44</sub> H <sub>73</sub> FeNi <sub>2</sub> As <sub>5</sub> |
| $D_{calc}/g\text{ cm}^{-3}$ | 1.649                                                           | 1.674                                                                                               | 1.624                                                             |
| $\mu/\text{mm}^{-1}$        | 11.670                                                          | 5.352                                                                                               | 7.484                                                             |
| Formula Weight              | 1144.17                                                         | 2419.35                                                                                             | 1149.89                                                           |
| Colour                      | Dark brown                                                      | Dark brown                                                                                          | Dark brown                                                        |
| Shape                       | Plate shaped                                                    | Block shaped                                                                                        | Block shaped                                                      |
| Size/mm <sup>3</sup>        | 0.19 x 0.05 x 0.05                                              | 0.21 x 0.14 x 0.12                                                                                  | 0.44 x 0.18 x 0.15                                                |
| $T/K$                       | 123.00(10)                                                      | 122.98(10)                                                                                          | 123.01(10)                                                        |
| Crystal System              | Monoclinic                                                      | Triclinic                                                                                           | Triclinic                                                         |
| Space Group                 | $P2_1/n$                                                        | $P-1$                                                                                               | $P-1$                                                             |
| $a/\text{Å}$                | 19.3733(2)                                                      | 14.9140(6)                                                                                          | 12.4331(2)                                                        |
| $b/\text{Å}$                | 10.87080(10)                                                    | 19.2206(9)                                                                                          | 12.5276(2)                                                        |
| $c/\text{Å}$                | 22.7856(2)                                                      | 19.5632(9)                                                                                          | 17.9814(3)                                                        |
| $\alpha/^\circ$             | 90                                                              | 63.886(4)                                                                                           | 72.5910(10)                                                       |
| $\beta/^\circ$              | 106.2280(10)                                                    | 79.623(4)                                                                                           | 70.5950(10)                                                       |
| $\gamma/^\circ$             | 90                                                              | 72.650(4)                                                                                           | 64.918(2)                                                         |
| $V/\text{Å}^3$              | 4608.48(8)                                                      | 4798.5(4)                                                                                           | 2351.07(8)                                                        |
| $Z$                         | 4                                                               | 2                                                                                                   | 2                                                                 |
| $Z'$                        | 1                                                               | 1                                                                                                   | 1                                                                 |
| Wavelength/Å                | 1.54184                                                         | 1.54184                                                                                             | 1.54184                                                           |
| Radiation type              | Cu K $\alpha$                                                   | Cu K $\alpha$                                                                                       | Cu K $\alpha$                                                     |
| $\theta_{min}/^\circ$       | 2.653                                                           | 2.643                                                                                               | 3.965                                                             |
| $\theta_{max}/^\circ$       | 73.487                                                          | 74.270                                                                                              | 73.011                                                            |
| Measured Refl.              | 40677                                                           | 31575                                                                                               | 33114                                                             |
| Independent Refl.           | 8821                                                            | 18494                                                                                               | 8990                                                              |
| Reflections with $I > 2(I)$ | 7899                                                            | 14896                                                                                               | 8889                                                              |
| $R_{int}$                   | 0.0342                                                          | 0.0225                                                                                              | 0.0228                                                            |
| Parameters                  | 492                                                             | 1275                                                                                                | 502                                                               |
| Restraints                  | 0                                                               | 0                                                                                                   | 18                                                                |
| Largest Peak                | 0.573                                                           | 0.767                                                                                               | 0.519                                                             |
| Deepest Hole                | -0.457                                                          | -0.508                                                                                              | -0.653                                                            |
| GooF                        | 1.052                                                           | 0.902                                                                                               | 1.155                                                             |
| $wR_2$ (all data)           | 0.0630                                                          | 0.0593                                                                                              | 0.0663                                                            |
| $wR_2$                      | 0.0614                                                          | 0.0583                                                                                              | 0.0661                                                            |
| $R_1$ (all data)            | 0.0316                                                          | 0.0314                                                                                              | 0.0265                                                            |
| $R_1$                       | 0.0268                                                          | 0.0254                                                                                              | 0.0260                                                            |

## 4.2 1-Cr

Compound **1-Cr** crystallizes in the monoclinic space group  $P2_1/n$  in form of dark red block shaped crystals from a concentrated solution in CH<sub>2</sub>Cl<sub>2</sub> layered with acetonitrile at room temperature. The asymmetric unit contains one molecule of **1-Cr**.

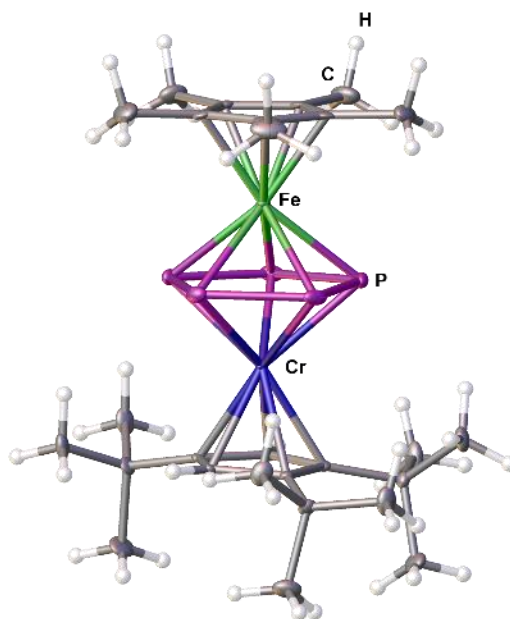

**Figure S 29.** Molecular structure of **1-Cr** in solid state. Thermal ellipsoids are drawn with 50 % probability level.

#### 4.3 2-Cr

Compound **2-Cr** crystallizes in the monoclinic space group  $P2_1/n$  in form of light green-blue block shaped crystals from a concentrated solution in  $\text{CH}_2\text{Cl}_2$  layered with acetonitrile at room temperature. The asymmetric unit contains one molecule of **2-Cr**.

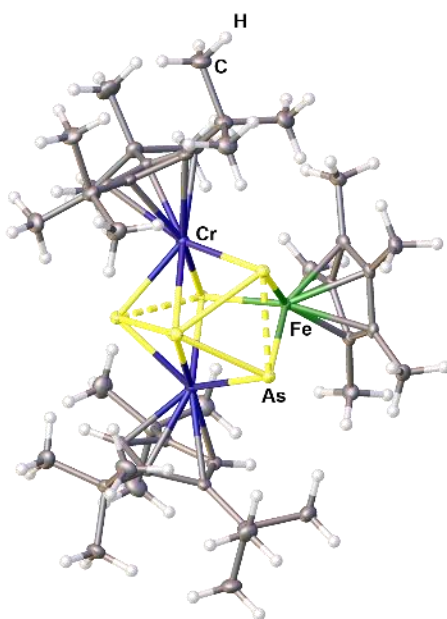

**Figure S 30.** Molecular structure of **2-Cr** in solid state. Thermal ellipsoids are drawn with 50 % probability level.



#### 4.4 1-Mn

Compound **1-Mn** crystallizes in the monoclinic space group  $P2_1/n$  in form of brownish green plate shaped crystals from a concentrated solution in pentane at 8°C. The asymmetric unit contains one molecule of **1-Mn**.

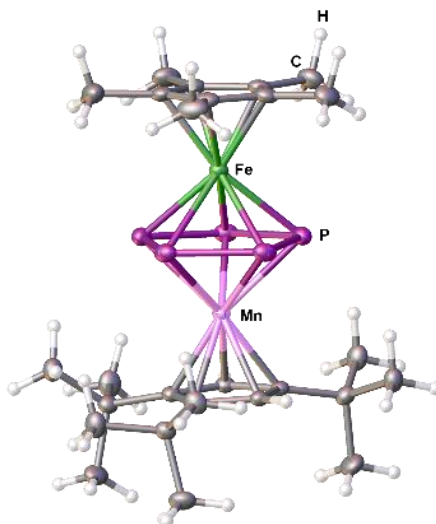

**Figure S 31.** Molecular structure of **1-Mn** in solid state. Thermal ellipsoids are drawn with 50 % probability level.

#### 4.5 1-Fe

Compound **1-Fe** crystallizes in the monoclinic space group  $P2_1/n$  in form of dark brown block shaped crystals from a concentrated solution in  $\text{CH}_2\text{Cl}_2$  layered with acetonitrile at room temperature. The asymmetric unit contains one molecule of **1-Fe**.

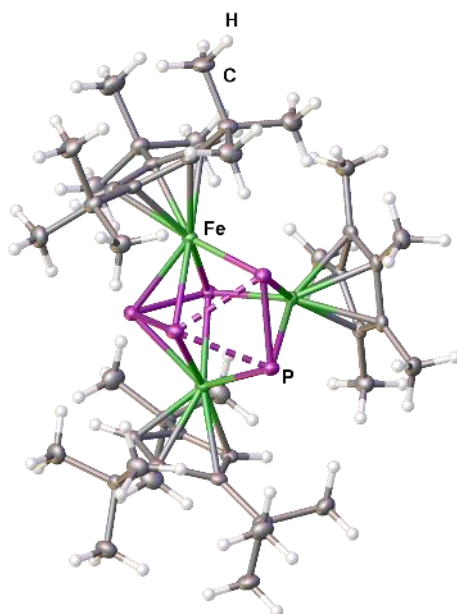

**Figure S 32.** Molecular structure of **1-Fe** in solid state. Thermal ellipsoids are drawn with 50 % probability level.

#### 4.6 2-Fe

Compound **2-Fe** crystallizes in the monoclinic space group  $P2_1/n$  in form of dark brown plate shaped crystals from a concentrated solution in  $\text{CH}_2\text{Cl}_2$  layered with acetonitrile at room temperature. The asymmetric unit contains one molecule of **2-Fe**.

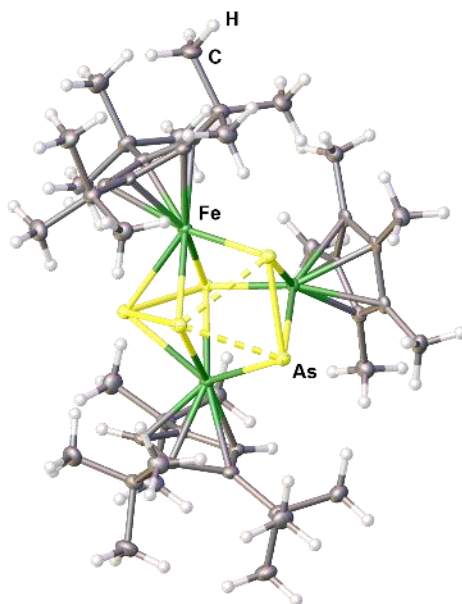

**Figure S 33.** Molecular structure of **2-Fe** in solid state. Thermal ellipsoids are drawn with 50 % probability level.

#### 4.7 3-Ag

Compound **3-Ag** crystallizes in the triclinic space group  $P-1$  in form of dark brown block shaped crystals from a concentrated solution in *o*-DFB layered with hexane at room temperature. The asymmetric unit contains one half molecule of **3-Ag** and one anion.

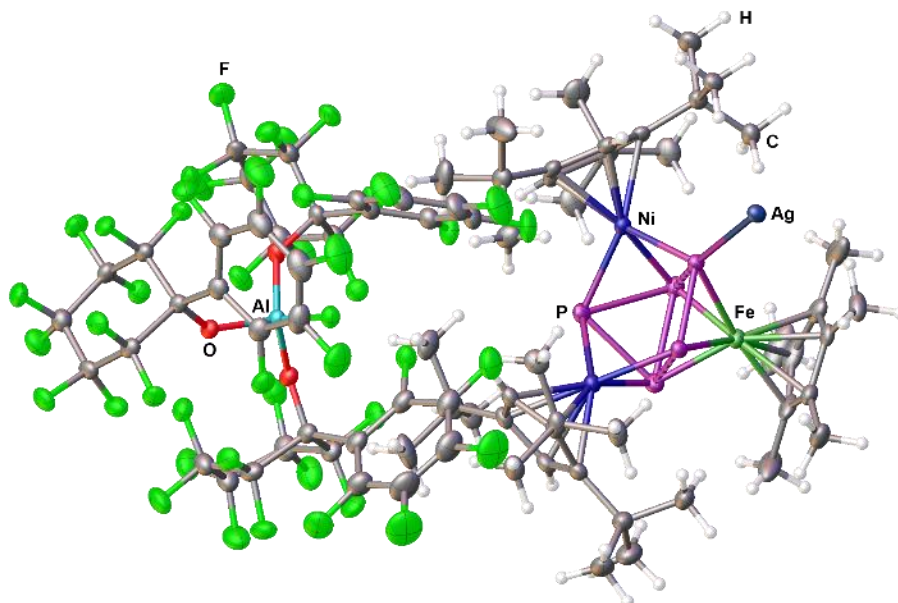

**Figure S 34.** Molecular structure of **3-Ag** in solid state. Thermal ellipsoids are drawn with 50 % probability level.

#### 4.8 2-Ni

Compound **2-Ni** crystallizes in the triclinic space group *P*-1 in form of dark brown block shaped crystals from a concentrated solution in CH<sub>2</sub>Cl<sub>2</sub> layered with acetonitrile at room temperature. The asymmetric unit contains one molecule of **2-Ni**. Within the solid-state structure As1 is slightly disordered over two positions (occupancy of 0.91 and 0.09). A solvent mask was calculated, and 9 electrons were found in a volume of 328 Å<sup>3</sup> in 1 void per unit cell. This is consistent with the presence of 0.2 CH<sub>3</sub>CN molecules per asymmetric unit which account for 9 electrons per unit cell.

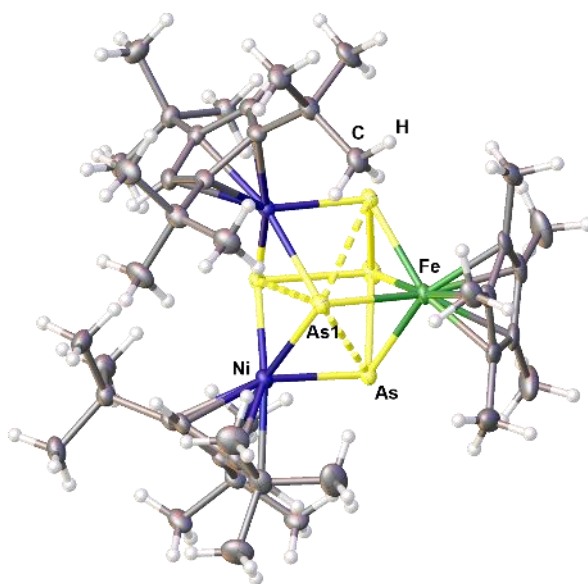

**Figure S 35.** Molecular structure of **2-Ni** in solid state depicting the part with the higher occupancy. Thermal ellipsoids are drawn with 50 % probability level.

## 5 Computational Details

The Gaussian 16<sup>[13]</sup> program was used for all calculations. Density functional theory (DFT) in form of BP86<sup>[14]</sup> (Becke's exchange and Perdew 86 correlation functional) with TZVP basis set was employed.<sup>[15]</sup> Subsequent analytical frequency analysis was carried out to confirm the presence of true minima on the potential energy surface. For **3-Ag** no frequency analysis was calculated due to computational costs. Electronic densities were analysed by Natural Bond Orbital analysis (NBO 7.0)<sup>[16]</sup> at the same level of theory. Long range empirical dispersion correction in form of GD3BJ<sup>[17]</sup> was applied. Figures concerning the DFT calculations for the supporting information were created with Chemcraft.<sup>[18]</sup>

**Table S 2.** Total energies for the optimized geometries (BP86/TZVP level of theory).

|                     | $E_{\text{total}}$ [Ha] | $H_{\text{total}}$ [Ha] | $G_{\text{total}}$ [Ha] |
|---------------------|-------------------------|-------------------------|-------------------------|
| <b>1-Cr doublet</b> | -5071.1398997           | -5071.1389555           | -5071.2557023           |
| <b>2-Cr triplet</b> | -16254.842309           | -16254.8413648          | -16255.0067975          |
| <b>2-Cr singlet</b> | -16254.8474274          | -16254.8464832          | -16255.0077907          |
| <b>1-Mn singlet</b> | -5177.6788506           | -5177.6779064           | -5177.7938715           |
| <b>1-Fe singlet</b> | -7219.6216898           | -7219.6207456           | -7219.7794774           |
| <b>2-Fe singlet</b> | -16693.419148           | -16693.4182038          | -16693.5849332          |
| <b>2-Ni singlet</b> | -17182.7572175          | -17182.7562733          | -17182.92398            |
| <b>1-Ni singlet</b> | -7708.918155            | -7708.9172108           | -7709.0799273           |

### 1-Cr (doublet)

|    |             |             |             |
|----|-------------|-------------|-------------|
| Fe | 1.097300000 | 3.406300000 | 7.643700000 |
| Cr | 3.034200000 | 3.430000000 | 5.333700000 |
| P  | 0.625800000 | 3.253700000 | 5.328700000 |
| P  | 3.108800000 | 4.638300000 | 7.440400000 |
| P  | 1.527700000 | 5.125800000 | 6.021800000 |
| P  | 1.752500000 | 1.609500000 | 6.207400000 |
| P  | 3.303100000 | 2.469400000 | 7.498900000 |
| C  | 3.856300000 | 2.322100000 | 3.641300000 |
| H  | 3.608000000 | 1.422700000 | 3.462300000 |
| C  | 3.849300000 | 4.588600000 | 3.676700000 |
| H  | 3.597800000 | 5.491800000 | 3.523500000 |
| C  | 4.950400000 | 4.172400000 | 4.502200000 |
| C  | 4.957900000 | 2.714600000 | 4.475000000 |
| C  | 2.207200000 | 3.475900000 | 1.965200000 |

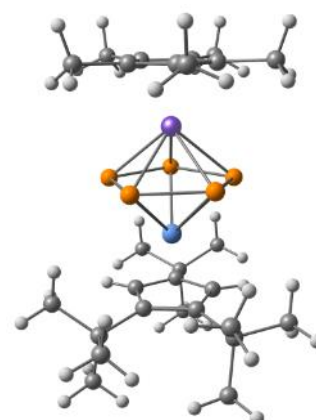

|   |              |              |              |
|---|--------------|--------------|--------------|
| C | 3.191000000  | 3.459300000  | 3.122800000  |
| C | -0.847700000 | 3.901800000  | 8.225700000  |
| C | -0.626100000 | 2.500100000  | 8.414800000  |
| C | 0.905900000  | 3.644300000  | 9.712600000  |
| C | 0.096500000  | 4.610200000  | 9.028200000  |
| C | 5.994300000  | 1.626400000  | 4.816300000  |
| C | 5.977500000  | 5.206300000  | 4.992700000  |
| C | 1.399500000  | 2.174400000  | 1.883900000  |
| H | 2.012800000  | 1.410800000  | 1.852700000  |
| H | 0.846900000  | 2.182900000  | 1.074600000  |
| H | 0.822700000  | 2.098200000  | 2.672500000  |
| C | 0.464900000  | 2.340800000  | 9.325200000  |
| C | 6.409400000  | 5.094700000  | 6.465100000  |
| H | 5.722500000  | 5.495000000  | 7.038200000  |
| H | 7.258100000  | 5.567700000  | 6.593300000  |
| H | 6.522600000  | 4.150500000  | 6.701700000  |
| C | 1.258200000  | 4.681000000  | 2.022600000  |
| H | 0.666000000  | 4.593700000  | 2.798600000  |
| H | 0.720900000  | 4.713000000  | 1.203700000  |
| H | 1.781700000  | 5.505600000  | 2.102300000  |
| C | 5.305600000  | 0.311000000  | 5.220700000  |
| H | 4.799700000  | 0.448300000  | 6.048800000  |
| H | 5.983400000  | -0.382300000 | 5.363100000  |
| H | 4.695000000  | 0.029400000  | 4.507800000  |
| C | 3.068100000  | 3.594600000  | 0.695500000  |
| H | 3.585300000  | 4.426400000  | 0.728100000  |
| H | 2.487100000  | 3.601900000  | -0.093600000 |
| H | 3.680300000  | 2.831200000  | 0.643400000  |
| C | 6.755200000  | 1.371300000  | 3.491500000  |
| H | 6.124100000  | 1.069000000  | 2.805400000  |
| H | 7.437400000  | 0.682300000  | 3.634100000  |
| H | 7.185400000  | 2.201000000  | 3.196800000  |
| C | -1.927600000 | 4.498700000  | 7.383800000  |
| H | -1.624800000 | 5.359200000  | 7.025800000  |

|   |              |             |              |
|---|--------------|-------------|--------------|
| H | -2.729500000 | 4.636100000 | 7.930100000  |
| H | -2.137100000 | 3.892200000 | 6.643000000  |
| C | 7.201600000  | 5.091800000 | 4.065100000  |
| H | 7.636500000  | 4.224600000 | 4.203700000  |
| H | 7.834900000  | 5.811200000 | 4.269700000  |
| H | 6.912400000  | 5.166800000 | 3.131800000  |
| C | 7.007000000  | 1.929900000 | 5.910800000  |
| H | 7.523000000  | 2.726500000 | 5.666700000  |
| H | 7.613500000  | 1.167200000 | 6.015300000  |
| H | 6.536800000  | 2.091400000 | 6.755300000  |
| C | 5.414400000  | 6.628200000 | 4.840600000  |
| H | 5.221000000  | 6.803600000 | 3.896000000  |
| H | 6.073400000  | 7.276900000 | 5.165000000  |
| H | 4.589800000  | 6.710700000 | 5.363700000  |
| C | 1.970800000  | 3.954900000 | 10.709500000 |
| H | 2.688600000  | 3.291400000 | 10.638200000 |
| H | 1.590700000  | 3.929000000 | 11.612400000 |
| H | 2.333000000  | 4.848200000 | 10.533000000 |
| C | 1.013300000  | 1.039900000 | 9.822000000  |
| H | 0.955900000  | 0.368200000 | 9.110700000  |
| H | 0.493100000  | 0.740600000 | 10.596700000 |
| H | 1.950200000  | 1.159100000 | 10.083800000 |
| C | 0.181600000  | 6.096700000 | 9.160900000  |
| H | 1.111200000  | 6.356800000 | 9.330200000  |
| H | -0.381000000 | 6.390700000 | 9.907500000  |
| H | -0.129500000 | 6.517000000 | 8.332100000  |
| C | -1.446500000 | 1.403100000 | 7.821300000  |
| H | -1.725700000 | 1.656800000 | 6.916800000  |
| H | -2.239100000 | 1.250600000 | 8.377100000  |
| H | -0.913300000 | 0.581900000 | 7.780400000  |

## 2-Cr (triplet)

|    |             |              |              |
|----|-------------|--------------|--------------|
| As | 2.664400000 | 4.639300000  | 16.633600000 |
| As | 1.366800000 | 4.637800000  | 14.433000000 |
| As | 4.326800000 | 2.376400000  | 14.167200000 |
| As | 3.484700000 | 6.043000000  | 14.662500000 |
| As | 5.293000000 | 4.735300000  | 13.589600000 |
| Fe | 2.332600000 | 2.685300000  | 15.347400000 |
| Cr | 4.878500000 | 4.107900000  | 15.899400000 |
| Cr | 3.076400000 | 4.099000000  | 12.843700000 |
| C  | 1.983100000 | 3.218300000  | 11.126200000 |
| H  | 1.388900000 | 2.489300000  | 11.260800000 |
| C  | 1.022600000 | 1.104000000  | 14.775400000 |
| C  | 2.203200000 | 1.104600000  | 16.769100000 |
| C  | 2.164300000 | 0.561600000  | 15.444400000 |
| C  | 2.813700000 | 5.360200000  | 10.973900000 |
| C  | 1.597600000 | 4.595300000  | 11.159800000 |
| C  | 3.867700000 | 4.406200000  | 10.802300000 |
| H  | 4.780400000 | 4.630800000  | 10.664500000 |
| C  | 3.134700000 | 0.677000000  | 17.866300000 |
| H  | 3.990900000 | 0.399700000  | 17.478500000 |
| H  | 2.739500000 | -0.074200000 | 18.356200000 |
| H  | 3.281800000 | 1.426300000  | 18.480600000 |
| C  | 1.085700000 | 1.971000000  | 16.913700000 |
| C  | 6.364600000 | 5.384000000  | 17.042400000 |
| C  | 4.600200000 | 7.124300000  | 10.624000000 |
| H  | 4.944700000 | 6.634700000  | 9.848200000  |
| H  | 5.058900000 | 6.817600000  | 11.433900000 |
| H  | 4.759200000 | 8.083600000  | 10.502000000 |
| C  | 3.042700000 | -0.540500000 | 14.922200000 |
| H  | 3.078400000 | -0.493900000 | 13.944000000 |
| H  | 2.676000000 | -1.407400000 | 15.194800000 |
| H  | 3.946400000 | -0.438700000 | 15.287300000 |
| C  | 0.499400000 | 0.685700000  | 13.435400000 |
| H  | 0.031400000 | 1.438700000  | 13.017900000 |

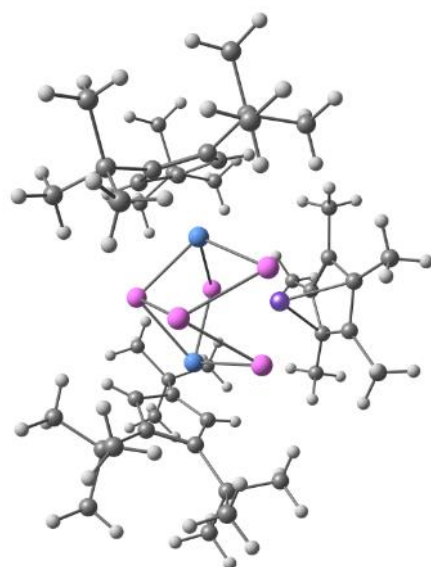



|   |              |              |              |
|---|--------------|--------------|--------------|
| H | -0.121900000 | -0.063900000 | 13.546700000 |
| H | 1.246600000  | 0.408700000  | 12.864900000 |
| C | 3.368500000  | 3.086800000  | 10.865400000 |
| C | 0.358300000  | 1.974400000  | 15.688800000 |
| C | 3.081500000  | 6.867100000  | 10.763000000 |
| C | 7.038400000  | 4.453900000  | 16.190900000 |
| H | 7.593100000  | 4.696300000  | 15.458800000 |
| C | 6.766600000  | 3.122700000  | 16.587500000 |
| C | 5.872500000  | 3.226800000  | 17.676100000 |
| H | 5.479600000  | 2.485700000  | 18.122100000 |
| C | 5.637400000  | 4.594500000  | 18.017600000 |
| C | -0.969700000 | 2.650200000  | 15.508400000 |
| H | -0.926100000 | 3.558800000  | 15.873000000 |
| H | -1.661800000 | 2.141700000  | 15.980500000 |
| H | -1.188400000 | 2.691300000  | 14.554000000 |
| C | 0.613800000  | 2.645900000  | 18.174400000 |
| H | 1.347300000  | 2.674800000  | 18.823700000 |
| H | -0.137600000 | 2.143000000  | 18.552600000 |
| H | 0.324500000  | 3.559100000  | 17.967500000 |
| C | 5.077000000  | 4.920500000  | 19.425200000 |
| C | 0.093300000  | 4.943100000  | 10.991100000 |
| C | 2.453000000  | 7.282900000  | 9.415700000  |
| H | 1.476200000  | 7.273100000  | 9.494100000  |
| H | 2.731000000  | 6.653900000  | 8.717600000  |
| H | 2.752700000  | 8.185700000  | 9.180200000  |
| C | 5.605600000  | 1.942500000  | 10.592900000 |
| H | 5.949000000  | 2.754700000  | 10.165200000 |
| H | 6.043700000  | 1.157600000  | 10.202700000 |
| H | 5.791500000  | 1.976100000  | 11.554500000 |
| C | 6.648000000  | 6.896100000  | 16.916100000 |
| C | 2.581100000  | 7.798900000  | 11.878500000 |
| H | 2.393200000  | 8.684900000  | 11.504200000 |
| H | 3.268900000  | 7.876600000  | 12.572300000 |
| H | 1.762300000  | 7.429300000  | 12.270100000 |

|   |              |              |              |
|---|--------------|--------------|--------------|
| C | 4.094200000  | 1.847600000  | 10.368300000 |
| C | -0.203200000 | 4.876100000  | 9.477300000  |
| H | -1.159700000 | 5.025000000  | 9.324800000  |
| H | 0.048800000  | 3.993500000  | 9.133800000  |
| H | 0.313200000  | 5.567200000  | 9.012400000  |
| C | 7.546800000  | 1.887700000  | 16.156300000 |
| C | -0.359300000 | 6.309400000  | 11.522300000 |
| H | 0.122500000  | 7.019700000  | 11.049300000 |
| H | -0.166900000 | 6.367000000  | 12.481500000 |
| H | -1.322500000 | 6.414300000  | 11.375400000 |
| C | 7.428600000  | 7.189000000  | 15.625700000 |
| H | 7.562000000  | 8.155800000  | 15.536900000 |
| H | 6.922300000  | 6.857000000  | 14.855100000 |
| H | 8.299500000  | 6.741100000  | 15.661900000 |
| C | 4.381700000  | 6.275300000  | 19.600500000 |
| H | 5.019600000  | 6.996100000  | 19.416300000 |
| H | 4.052800000  | 6.357100000  | 20.520000000 |
| H | 3.628100000  | 6.338800000  | 18.977100000 |
| C | 6.273800000  | 4.854700000  | 20.391700000 |
| H | 6.718300000  | 3.985900000  | 20.302600000 |
| H | 5.956800000  | 4.966500000  | 21.312300000 |
| H | 6.908000000  | 5.569800000  | 20.175500000 |
| C | 6.754700000  | 0.598000000  | 16.359800000 |
| H | 6.499500000  | 0.516600000  | 17.302500000 |
| H | 7.308200000  | -0.169200000 | 16.103800000 |
| H | 5.948000000  | 0.618900000  | 15.803600000 |
| C | 4.063400000  | 3.856300000  | 19.877500000 |
| H | 3.323700000  | 3.816100000  | 19.235900000 |
| H | 3.715500000  | 4.091900000  | 20.762900000 |
| H | 4.505100000  | 2.982600000  | 19.922000000 |
| C | 3.564200000  | 0.561800000  | 11.002000000 |
| H | 3.704900000  | 0.593100000  | 11.971400000 |
| H | 4.041300000  | -0.207900000 | 10.627400000 |
| H | 2.606300000  | 0.475500000  | 10.813700000 |

|   |              |             |              |
|---|--------------|-------------|--------------|
| C | 7.569100000  | 7.310100000 | 18.081600000 |
| H | 8.310700000  | 6.673500000 | 18.153800000 |
| H | 7.057600000  | 7.311800000 | 18.917500000 |
| H | 7.924400000  | 8.207900000 | 17.914200000 |
| C | 8.002100000  | 1.981000000 | 14.702600000 |
| H | 7.218100000  | 1.987000000 | 14.114500000 |
| H | 8.566400000  | 1.209400000 | 14.486800000 |
| H | 8.514000000  | 2.806500000 | 14.573000000 |
| C | 5.404300000  | 7.819700000 | 16.883100000 |
| H | 5.641000000  | 8.699400000 | 17.244300000 |
| H | 4.689900000  | 7.425100000 | 17.425700000 |
| H | 5.095300000  | 7.918700000 | 15.958300000 |
| C | -0.799300000 | 3.897600000 | 11.677000000 |
| H | -1.740300000 | 4.146800000 | 11.564100000 |
| H | -0.583600000 | 3.860100000 | 12.632300000 |
| H | -0.643300000 | 3.018800000 | 11.272200000 |
| C | 8.791200000  | 1.829400000 | 17.066000000 |
| H | 9.315900000  | 2.649600000 | 16.954700000 |
| H | 9.339400000  | 1.055100000 | 16.820400000 |
| H | 8.508900000  | 1.746500000 | 18.000800000 |
| C | 3.815000000  | 1.788100000 | 8.848500000  |
| H | 2.855500000  | 1.657900000 | 8.697400000  |
| H | 4.312100000  | 1.041300000 | 8.454000000  |
| H | 4.100500000  | 2.627400000 | 8.430800000  |

## 2-Cr (singlet)

|    |             |              |              |
|----|-------------|--------------|--------------|
| As | 2.664400000 | 4.639300000  | 16.633600000 |
| As | 1.366800000 | 4.637800000  | 14.433000000 |
| As | 4.326800000 | 2.376400000  | 14.167200000 |
| As | 3.484700000 | 6.043000000  | 14.662500000 |
| As | 5.293000000 | 4.735300000  | 13.589600000 |
| Fe | 2.332600000 | 2.685300000  | 15.347400000 |
| Cr | 4.878500000 | 4.107900000  | 15.899400000 |
| Cr | 3.076400000 | 4.099000000  | 12.843700000 |
| C  | 1.983100000 | 3.218300000  | 11.126200000 |
| H  | 1.388900000 | 2.489300000  | 11.260800000 |
| C  | 1.022600000 | 1.104000000  | 14.775400000 |
| C  | 2.203200000 | 1.104600000  | 16.769100000 |
| C  | 2.164300000 | 0.561600000  | 15.444400000 |
| C  | 2.813700000 | 5.360200000  | 10.973900000 |
| C  | 1.597600000 | 4.595300000  | 11.159800000 |
| C  | 3.867700000 | 4.406200000  | 10.802300000 |
| H  | 4.780400000 | 4.630800000  | 10.664500000 |
| C  | 3.134700000 | 0.677000000  | 17.866300000 |
| H  | 3.990900000 | 0.399700000  | 17.478500000 |
| H  | 2.739500000 | -0.074200000 | 18.356200000 |
| H  | 3.281800000 | 1.426300000  | 18.480600000 |
| C  | 1.085700000 | 1.971000000  | 16.913700000 |
| C  | 6.364600000 | 5.384000000  | 17.042400000 |
| C  | 4.600200000 | 7.124300000  | 10.624000000 |
| H  | 4.944700000 | 6.634700000  | 9.848200000  |
| H  | 5.058900000 | 6.817600000  | 11.433900000 |
| H  | 4.759200000 | 8.083600000  | 10.502000000 |
| C  | 3.042700000 | -0.540500000 | 14.922200000 |
| H  | 3.078400000 | -0.493900000 | 13.944000000 |
| H  | 2.676000000 | -1.407400000 | 15.194800000 |
| H  | 3.946400000 | -0.438700000 | 15.287300000 |
| C  | 0.499400000 | 0.685700000  | 13.435400000 |
| H  | 0.031400000 | 1.438700000  | 13.017900000 |

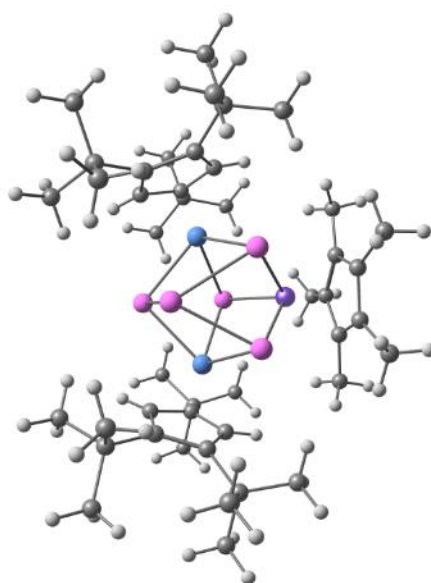

|   |              |              |              |
|---|--------------|--------------|--------------|
| H | -0.121900000 | -0.063900000 | 13.546700000 |
| H | 1.246600000  | 0.408700000  | 12.864900000 |
| C | 3.368500000  | 3.086800000  | 10.865400000 |
| C | 0.358300000  | 1.974400000  | 15.688800000 |
| C | 3.081500000  | 6.867100000  | 10.763000000 |
| C | 7.038400000  | 4.453900000  | 16.190900000 |
| H | 7.593100000  | 4.696300000  | 15.458800000 |
| C | 6.766600000  | 3.122700000  | 16.587500000 |
| C | 5.872500000  | 3.226800000  | 17.676100000 |
| H | 5.479600000  | 2.485700000  | 18.122100000 |
| C | 5.637400000  | 4.594500000  | 18.017600000 |
| C | -0.969700000 | 2.650200000  | 15.508400000 |
| H | -0.926100000 | 3.558800000  | 15.873000000 |
| H | -1.661800000 | 2.141700000  | 15.980500000 |
| H | -1.188400000 | 2.691300000  | 14.554000000 |
| C | 0.613800000  | 2.645900000  | 18.174400000 |
| H | 1.347300000  | 2.674800000  | 18.823700000 |
| H | -0.137600000 | 2.143000000  | 18.552600000 |
| H | 0.324500000  | 3.559100000  | 17.967500000 |
| C | 5.077000000  | 4.920500000  | 19.425200000 |
| C | 0.093300000  | 4.943100000  | 10.991100000 |
| C | 2.453000000  | 7.282900000  | 9.415700000  |
| H | 1.476200000  | 7.273100000  | 9.494100000  |
| H | 2.731000000  | 6.653900000  | 8.717600000  |
| H | 2.752700000  | 8.185700000  | 9.180200000  |
| C | 5.605600000  | 1.942500000  | 10.592900000 |
| H | 5.949000000  | 2.754700000  | 10.165200000 |
| H | 6.043700000  | 1.157600000  | 10.202700000 |
| H | 5.791500000  | 1.976100000  | 11.554500000 |
| C | 6.648000000  | 6.896100000  | 16.916100000 |
| C | 2.581100000  | 7.798900000  | 11.878500000 |
| H | 2.393200000  | 8.684900000  | 11.504200000 |
| H | 3.268900000  | 7.876600000  | 12.572300000 |
| H | 1.762300000  | 7.429300000  | 12.270100000 |

|   |              |              |              |
|---|--------------|--------------|--------------|
| C | 4.094200000  | 1.847600000  | 10.368300000 |
| C | -0.203200000 | 4.876100000  | 9.477300000  |
| H | -1.159700000 | 5.025000000  | 9.324800000  |
| H | 0.048800000  | 3.993500000  | 9.133800000  |
| H | 0.313200000  | 5.567200000  | 9.012400000  |
| C | 7.546800000  | 1.887700000  | 16.156300000 |
| C | -0.359300000 | 6.309400000  | 11.522300000 |
| H | 0.122500000  | 7.019700000  | 11.049300000 |
| H | -0.166900000 | 6.367000000  | 12.481500000 |
| H | -1.322500000 | 6.414300000  | 11.375400000 |
| C | 7.428600000  | 7.189000000  | 15.625700000 |
| H | 7.562000000  | 8.155800000  | 15.536900000 |
| H | 6.922300000  | 6.857000000  | 14.855100000 |
| H | 8.299500000  | 6.741100000  | 15.661900000 |
| C | 4.381700000  | 6.275300000  | 19.600500000 |
| H | 5.019600000  | 6.996100000  | 19.416300000 |
| H | 4.052800000  | 6.357100000  | 20.520000000 |
| H | 3.628100000  | 6.338800000  | 18.977100000 |
| C | 6.273800000  | 4.854700000  | 20.391700000 |
| H | 6.718300000  | 3.985900000  | 20.302600000 |
| H | 5.956800000  | 4.966500000  | 21.312300000 |
| H | 6.908000000  | 5.569800000  | 20.175500000 |
| C | 6.754700000  | 0.598000000  | 16.359800000 |
| H | 6.499500000  | 0.516600000  | 17.302500000 |
| H | 7.308200000  | -0.169200000 | 16.103800000 |
| H | 5.948000000  | 0.618900000  | 15.803600000 |
| C | 4.063400000  | 3.856300000  | 19.877500000 |
| H | 3.323700000  | 3.816100000  | 19.235900000 |
| H | 3.715500000  | 4.091900000  | 20.762900000 |
| H | 4.505100000  | 2.982600000  | 19.922000000 |
| C | 3.564200000  | 0.561800000  | 11.002000000 |
| H | 3.704900000  | 0.593100000  | 11.971400000 |
| H | 4.041300000  | -0.207900000 | 10.627400000 |
| H | 2.606300000  | 0.475500000  | 10.813700000 |

|   |              |             |              |
|---|--------------|-------------|--------------|
| C | 7.569100000  | 7.310100000 | 18.081600000 |
| H | 8.310700000  | 6.673500000 | 18.153800000 |
| H | 7.057600000  | 7.311800000 | 18.917500000 |
| H | 7.924400000  | 8.207900000 | 17.914200000 |
| C | 8.002100000  | 1.981000000 | 14.702600000 |
| H | 7.218100000  | 1.987000000 | 14.114500000 |
| H | 8.566400000  | 1.209400000 | 14.486800000 |
| H | 8.514000000  | 2.806500000 | 14.573000000 |
| C | 5.404300000  | 7.819700000 | 16.883100000 |
| H | 5.641000000  | 8.699400000 | 17.244300000 |
| H | 4.689900000  | 7.425100000 | 17.425700000 |
| H | 5.095300000  | 7.918700000 | 15.958300000 |
| C | -0.799300000 | 3.897600000 | 11.677000000 |
| H | -1.740300000 | 4.146800000 | 11.564100000 |
| H | -0.583600000 | 3.860100000 | 12.632300000 |
| H | -0.643300000 | 3.018800000 | 11.272200000 |
| C | 8.791200000  | 1.829400000 | 17.066000000 |
| H | 9.315900000  | 2.649600000 | 16.954700000 |
| H | 9.339400000  | 1.055100000 | 16.820400000 |
| H | 8.508900000  | 1.746500000 | 18.000800000 |
| C | 3.815000000  | 1.788100000 | 8.848500000  |
| H | 2.855500000  | 1.657900000 | 8.697400000  |
| H | 4.312100000  | 1.041300000 | 8.454000000  |
| H | 4.100500000  | 2.627400000 | 8.430800000  |

### 1-Mn (singlet)

|    |              |              |              |
|----|--------------|--------------|--------------|
| Mn | -0.849557000 | 0.221782000  | -0.018399000 |
| Fe | 2.217497000  | -0.096142000 | 0.001235000  |
| P  | 0.680504000  | 0.430374000  | 1.789726000  |
| P  | 0.925635000  | 1.870784000  | 0.203672000  |
| P  | 0.610512000  | -1.286160000 | -1.263800000 |
| P  | 0.487335000  | -1.529179000 | 0.876321000  |
| P  | 0.702285000  | 0.829062000  | -1.681117000 |
| C  | -2.511609000 | 0.827274000  | -1.149194000 |

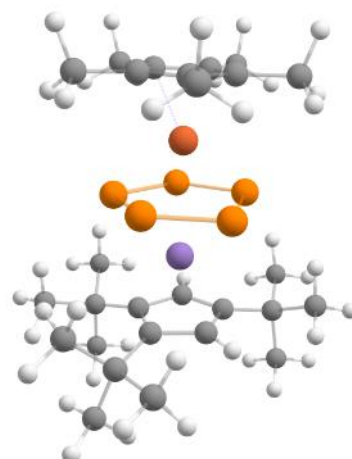

|   |              |              |              |
|---|--------------|--------------|--------------|
| H | -2.461255000 | 1.163447000  | -2.179238000 |
| C | -2.503206000 | 0.834713000  | 1.120651000  |
| H | -2.450381000 | 1.177235000  | 2.149131000  |
| C | -2.705251000 | -0.533917000 | 0.722291000  |
| C | -2.401580000 | 1.684542000  | -0.016131000 |
| C | -2.710532000 | -0.539525000 | -0.740318000 |
| C | -2.460181000 | 3.200814000  | -0.023242000 |
| C | 3.974897000  | 0.627909000  | 0.844027000  |
| C | 3.872857000  | -0.517431000 | -1.180562000 |
| C | 4.003806000  | 0.786641000  | -0.585627000 |
| C | -2.363775000 | -1.273654000 | 3.126954000  |
| H | -1.280391000 | -1.409094000 | 3.006296000  |
| H | -2.712307000 | -1.984138000 | 3.891714000  |
| H | -2.540725000 | -0.262665000 | 3.515754000  |
| C | -1.883694000 | 3.795907000  | 1.271376000  |
| H | -2.428893000 | 3.437107000  | 2.156656000  |
| H | -1.966260000 | 4.893316000  | 1.250478000  |
| H | -0.823022000 | 3.534245000  | 1.392445000  |
| C | -3.113896000 | -1.546968000 | 1.804426000  |
| C | 3.762601000  | -1.481802000 | -0.118488000 |
| C | 3.819743000  | -0.773412000 | 1.132932000  |
| C | -2.260458000 | -2.898699000 | -1.766995000 |
| H | -1.294574000 | -2.727499000 | -2.260176000 |
| H | -2.787636000 | -3.685715000 | -2.329685000 |
| H | -2.050121000 | -3.276636000 | -0.765484000 |
| C | 4.170544000  | 2.074073000  | -1.324917000 |
| H | 3.657360000  | 2.045333000  | -2.295740000 |
| H | 5.237246000  | 2.282747000  | -1.511202000 |
| H | 3.755537000  | 2.917618000  | -0.756830000 |
| C | 4.105487000  | 1.721455000  | 1.853214000  |
| H | 3.716036000  | 2.672474000  | 1.465233000  |
| H | 5.162344000  | 1.875130000  | 2.127889000  |
| H | 3.548820000  | 1.486035000  | 2.770555000  |
| C | 3.633859000  | -2.960805000 | -0.283163000 |



|   |              |              |              |
|---|--------------|--------------|--------------|
| H | 3.052855000  | -3.404076000 | 0.537090000  |
| H | 4.626625000  | -3.440686000 | -0.293763000 |
| H | 3.125659000  | -3.215304000 | -1.223142000 |
| C | -4.624341000 | -1.325524000 | 2.068520000  |
| H | -4.812574000 | -0.291776000 | 2.393180000  |
| H | -4.975471000 | -2.006411000 | 2.859996000  |
| H | -5.223401000 | -1.508102000 | 1.166538000  |
| C | -1.728696000 | 3.796275000  | -1.237260000 |
| H | -0.650156000 | 3.591732000  | -1.193215000 |
| H | -1.869477000 | 4.887777000  | -1.263072000 |
| H | -2.114172000 | 3.386659000  | -2.182200000 |
| C | -3.103056000 | -1.607048000 | -1.776430000 |
| C | -4.596549000 | -1.948395000 | -1.566178000 |
| H | -4.766180000 | -2.497170000 | -0.631522000 |
| H | -4.958859000 | -2.577148000 | -2.394622000 |
| H | -5.204262000 | -1.031616000 | -1.536620000 |
| C | -3.960579000 | 3.572877000  | -0.115867000 |
| H | -4.405434000 | 3.176205000  | -1.040492000 |
| H | -4.085638000 | 4.667187000  | -0.112103000 |
| H | -4.519350000 | 3.156720000  | 0.735508000  |
| C | -2.967069000 | -1.032649000 | -3.203108000 |
| H | -3.660780000 | -0.198852000 | -3.383642000 |
| H | -3.197715000 | -1.823860000 | -3.932168000 |
| H | -1.940394000 | -0.686835000 | -3.395119000 |
| C | 3.882034000  | -0.817668000 | -2.643928000 |
| H | 3.292306000  | -1.716053000 | -2.871127000 |
| H | 4.911276000  | -0.988321000 | -3.001197000 |
| H | 3.456384000  | 0.012466000  | -3.223836000 |
| C | 3.765766000  | -1.389115000 | 2.492999000  |
| H | 3.327589000  | -0.698802000 | 3.226389000  |
| H | 4.777419000  | -1.656658000 | 2.841143000  |
| H | 3.155813000  | -2.302612000 | 2.493287000  |
| C | -2.877351000 | -3.027377000 | 1.478045000  |
| H | -3.476728000 | -3.376357000 | 0.630178000  |

|   |              |              |             |
|---|--------------|--------------|-------------|
| H | -3.160279000 | -3.635474000 | 2.351114000 |
| H | -1.815517000 | -3.220591000 | 1.267278000 |

**1-Fe (singlet)**

|    |              |              |              |
|----|--------------|--------------|--------------|
| Fe | 1.734153000  | -0.383390000 | 0.160603000  |
| Fe | -1.734264000 | -0.383109000 | 0.160315000  |
| Fe | 0.000085000  | 1.728024000  | -0.531418000 |
| P  | 1.109775000  | 0.283249000  | -1.861526000 |
| P  | -1.109425000 | 0.283258000  | -1.861811000 |
| P  | -0.000268000 | -1.478961000 | 1.278132000  |
| P  | -0.000186000 | 0.707178000  | 1.417296000  |
| P  | -0.000053000 | -1.641385000 | -0.889128000 |
| C  | 2.931517000  | -1.622166000 | 1.338229000  |
| H  | 2.543617000  | -2.398447000 | 1.987562000  |
| C  | 3.762036000  | -0.526790000 | -0.521512000 |
| C  | 3.626115000  | 0.396716000  | 0.578287000  |
| H  | 3.893340000  | 1.445694000  | 0.537283000  |
| C  | 3.160711000  | -0.276018000 | 1.743450000  |
| C  | 3.280353000  | -1.818805000 | -0.041624000 |
| C  | -2.932042000 | -1.620857000 | 1.338656000  |
| H  | -2.544416000 | -2.396640000 | 1.988744000  |
| C  | -3.161198000 | -0.274381000 | 1.742735000  |
| C  | -3.761901000 | -0.526907000 | -0.522206000 |
| C  | 1.163052000  | 3.497135000  | -0.371754000 |
| C  | -0.000141000 | 3.589686000  | 0.466290000  |
| C  | 3.197489000  | 0.218218000  | 3.176233000  |
| C  | -3.198401000 | 0.220808000  | 3.175178000  |
| C  | -3.626215000 | 0.397478000  | 0.576900000  |
| H  | -3.893251000 | 1.446468000  | 0.534964000  |
| C  | 0.718579000  | 3.351462000  | -1.725880000 |
| C  | -1.162583000 | 3.497307000  | -0.372816000 |
| C  | -0.716842000 | 3.351455000  | -1.726518000 |
| C  | -4.631522000 | -0.120998000 | -1.722172000 |
| C  | 3.301753000  | -3.235386000 | -0.639298000 |

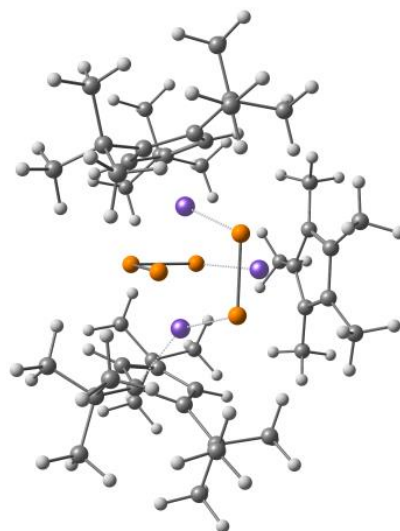

|   |              |              |              |
|---|--------------|--------------|--------------|
| C | 4.632096000  | -0.120025000 | -1.720862000 |
| C | -3.280523000 | -1.818611000 | -0.041124000 |
| C | -1.545517000 | 3.404435000  | -2.970598000 |
| H | -1.285634000 | 4.305839000  | -3.550737000 |
| H | -2.616491000 | 3.454724000  | -2.743955000 |
| H | -1.378467000 | 2.531729000  | -3.619953000 |
| C | -3.302050000 | -3.235773000 | -0.637486000 |
| C | -2.953494000 | 1.731765000  | 3.254137000  |
| H | -2.991306000 | 2.071144000  | 4.300252000  |
| H | -3.715400000 | 2.293082000  | 2.693318000  |
| H | -1.960065000 | 1.966595000  | 2.847545000  |
| C | 1.548290000  | 3.404642000  | -2.969292000 |
| H | 1.384618000  | 2.530200000  | -3.617218000 |
| H | 2.618884000  | 3.458679000  | -2.741666000 |
| H | 1.286144000  | 4.304105000  | -3.551374000 |
| C | 2.562464000  | 3.755926000  | 0.075036000  |
| H | 2.746547000  | 3.350669000  | 1.076366000  |
| H | 2.748872000  | 4.843349000  | 0.118091000  |
| H | 3.294607000  | 3.321827000  | -0.614013000 |
| C | 6.099991000  | -0.347715000 | -1.279413000 |
| H | 6.784720000  | -0.027303000 | -2.080461000 |
| H | 6.301216000  | -1.403133000 | -1.056840000 |
| H | 6.326791000  | 0.236839000  | -0.375666000 |
| C | -2.562485000 | 3.756267000  | 0.072338000  |
| H | -3.293812000 | 3.320870000  | -0.616771000 |
| H | -2.749369000 | 4.843678000  | 0.113548000  |
| H | -2.747388000 | 3.352416000  | 1.074086000  |
| C | 2.952807000  | 1.729177000  | 3.256156000  |
| H | 3.714947000  | 2.290777000  | 2.695938000  |
| H | 2.990409000  | 2.067807000  | 4.302522000  |
| H | 1.959511000  | 1.964492000  | 2.849495000  |
| C | 2.615918000  | -4.226423000 | 0.326869000  |
| H | 1.583523000  | -3.916799000 | 0.548209000  |
| H | 3.165338000  | -4.334215000 | 1.273626000  |

|   |              |              |              |
|---|--------------|--------------|--------------|
| H | 2.576550000  | -5.217318000 | -0.149505000 |
| C | 2.579645000  | -3.397572000 | -1.993740000 |
| H | 2.923150000  | -4.321916000 | -2.484585000 |
| H | 2.742187000  | -2.563619000 | -2.677492000 |
| H | 1.496135000  | -3.478830000 | -1.839822000 |
| C | -6.099590000 | -0.348220000 | -1.281074000 |
| H | -6.784009000 | -0.028581000 | -2.082695000 |
| H | -6.326724000 | 0.237230000  | -0.377988000 |
| H | -6.300924000 | -1.403412000 | -1.057532000 |
| C | -2.616715000 | -4.226053000 | 0.329832000  |
| H | -1.584370000 | -3.916370000 | 0.551318000  |
| H | -2.577300000 | -5.217378000 | -0.145640000 |
| H | -3.166522000 | -4.332931000 | 1.276467000  |
| C | -2.169734000 | -0.504448000 | 4.057706000  |
| H | -1.147465000 | -0.294886000 | 3.714436000  |
| H | -2.320441000 | -1.593458000 | 4.049109000  |
| H | -2.264637000 | -0.162255000 | 5.099577000  |
| C | 4.777295000  | -3.681783000 | -0.768064000 |
| H | 5.319498000  | -3.520647000 | 0.175977000  |
| H | 5.306705000  | -3.141804000 | -1.562441000 |
| H | 4.818644000  | -4.755190000 | -1.009753000 |
| C | 4.467195000  | 1.379926000  | -2.022176000 |
| H | 4.821728000  | 2.009204000  | -1.195258000 |
| H | 3.414559000  | 1.610315000  | -2.226621000 |
| H | 5.057678000  | 1.645278000  | -2.911471000 |
| C | -4.777633000 | -3.681996000 | -0.766308000 |
| H | -5.320131000 | -3.519822000 | 0.177388000  |
| H | -4.819119000 | -4.755635000 | -1.006947000 |
| H | -5.306664000 | -3.142704000 | -1.561405000 |
| C | 4.384437000  | -0.857790000 | -3.044001000 |
| H | 5.047304000  | -0.433633000 | -3.813854000 |
| H | 3.346676000  | -0.722275000 | -3.380370000 |
| H | 4.603718000  | -1.928402000 | -2.981028000 |
| C | -0.000581000 | 3.979329000  | 1.908562000  |

|   |              |              |              |
|---|--------------|--------------|--------------|
| H | -0.886969000 | 3.605861000  | 2.434966000  |
| H | 0.001865000  | 5.079526000  | 1.998240000  |
| H | 0.883056000  | 3.601729000  | 2.436680000  |
| C | -4.383371000 | -0.859867000 | -3.044597000 |
| H | -4.603115000 | -1.930342000 | -2.980880000 |
| H | -3.345362000 | -0.724994000 | -3.380466000 |
| H | -5.045626000 | -0.436088000 | -3.815182000 |
| C | -4.466439000 | 1.378702000  | -2.024702000 |
| H | -5.057093000 | 1.643416000  | -2.914075000 |
| H | -3.413799000 | 1.608727000  | -2.229617000 |
| H | -4.820675000 | 2.008723000  | -1.198225000 |
| C | 4.620078000  | -0.093856000 | 3.700670000  |
| H | 4.822254000  | -1.174669000 | 3.664968000  |
| H | 4.723623000  | 0.243331000  | 4.744050000  |
| H | 5.383272000  | 0.415520000  | 3.093444000  |
| C | 2.168454000  | -0.507489000 | 4.057949000  |
| H | 1.146306000  | -0.297591000 | 3.714542000  |
| H | 2.263104000  | -0.166035000 | 5.100087000  |
| H | 2.319013000  | -1.596515000 | 4.048635000  |
| C | -2.579573000 | -3.399515000 | -1.991497000 |
| H | -2.743078000 | -2.567046000 | -2.676821000 |
| H | -2.921969000 | -4.325170000 | -2.480649000 |
| H | -1.495984000 | -3.479231000 | -1.837301000 |
| C | -4.621199000 | -0.090713000 | 3.699350000  |
| H | -4.725023000 | 0.247151000  | 4.742484000  |
| H | -4.823536000 | -1.171515000 | 3.664262000  |
| H | -5.384119000 | 0.418404000  | 3.091559000  |

### 2-Fe (singlet)

|    |            |            |            |
|----|------------|------------|------------|
| As | -1.2277593 | 0.808852   | -1.7237595 |
| As | 1.3352953  | 0.6063032  | -1.8278881 |
| As | -0.0599001 | 0.6339428  | 1.5351619  |
| As | -0.1138487 | -1.8001282 | 1.0651358  |
| As | -0.0848937 | -1.5050013 | -1.3459666 |

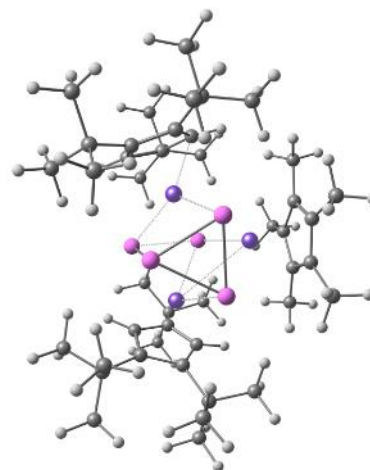

|    |            |            |            |
|----|------------|------------|------------|
| Fe | -1.8614425 | -0.4054765 | 0.1869625  |
| Fe | 1.7598029  | -0.5230184 | 0.1887848  |
| Fe | 0.2440425  | 1.9818208  | -0.3132016 |
| C  | 0.2953427  | 3.6844998  | 0.99207    |
| C  | 2.8762226  | 3.801839   | 0.7055754  |
| H  | 3.0056692  | 3.2069833  | 1.6189985  |
| H  | 3.1240413  | 4.8477175  | 0.9576668  |
| H  | 3.6096277  | 3.4591587  | -0.033408  |
| C  | -2.261277  | 3.891673   | 0.5764729  |
| H  | -2.9663359 | 3.604714   | -0.2120062 |
| H  | -2.4793622 | 4.936576   | 0.8582274  |
| H  | -2.4605257 | 3.2625186  | 1.4535043  |
| C  | 2.8879524  | -1.9246468 | 1.2350879  |
| H  | 2.4845967  | -2.7836197 | 1.7590388  |
| C  | 4.7882207  | -0.0530018 | -1.4844267 |
| C  | -3.9266984 | -0.2910894 | -0.4787112 |
| C  | 3.8244512  | -0.5985329 | -0.4170593 |
| C  | -4.7637012 | 0.3550539  | -1.59572   |
| C  | 1.4813093  | 3.7038122  | 0.1817527  |
| C  | -3.1884844 | -1.7048598 | 1.1927554  |
| H  | -2.8833497 | -2.5963693 | 1.7288237  |
| C  | 3.3110491  | -1.9357323 | -0.1394833 |
| C  | -0.8457262 | 3.7507114  | 0.1229351  |
| C  | -3.7019003 | 0.458612   | 0.7341747  |
| H  | -3.8802959 | 1.5217669  | 0.8441081  |
| C  | -3.5808513 | -1.6790672 | -0.1848668 |
| C  | 3.6216502  | 0.1740522  | 0.7853794  |
| H  | 3.8824481  | 1.2200397  | 0.8952019  |
| C  | 3.0956443  | -0.6447121 | 1.8258435  |
| C  | 1.077178   | 3.7723728  | -1.1881448 |
| C  | -3.2661971 | -0.1055228 | 3.2672086  |
| C  | -0.3627223 | 3.7987001  | -1.2281436 |
| C  | -2.234733  | -0.962522  | 4.0176212  |
| H  | -2.390099  | -2.0363746 | 3.8399941  |

|   |            |            |            |
|---|------------|------------|------------|
| H | -2.3155169 | -0.7862991 | 5.1011948  |
| H | -1.2146054 | -0.7051993 | 3.701538   |
| C | 3.0799431  | -0.3405795 | 3.3111709  |
| C | 6.2131411  | -0.4011894 | -0.9820291 |
| H | 6.3866922  | 0.0318259  | 0.0140316  |
| H | 6.9640087  | 0.0108122  | -1.6744883 |
| H | 6.3694529  | -1.4843831 | -0.9099915 |
| C | -3.2784008 | -0.4044079 | 1.779713   |
| C | -3.7207729 | -2.9868547 | -0.9799949 |
| C | -4.5306302 | 1.877857   | -1.6571342 |
| H | -4.8180113 | 2.381631   | -0.7251054 |
| H | -5.1415623 | 2.3067448  | -2.4651124 |
| H | -3.4769431 | 2.1039812  | -1.874916  |
| C | -1.1678865 | 4.0394463  | -2.4657518 |
| H | -0.8179946 | 3.4248974  | -3.3073407 |
| H | -1.0914266 | 5.0980075  | -2.7688831 |
| H | -2.2307773 | 3.8149857  | -2.3112806 |
| C | 1.9826529  | -1.1214906 | 4.0504243  |
| H | 0.986818   | -0.7930029 | 3.7235099  |
| H | 2.0653491  | -0.9488881 | 5.1343547  |
| H | 2.0630807  | -2.2041072 | 3.8763268  |
| C | 4.8174968  | -3.7124944 | -1.058405  |
| H | 5.3908886  | -3.0810574 | -1.7474952 |
| H | 4.8502155  | -4.7425654 | -1.4457807 |
| H | 5.3204919  | -3.6972914 | -0.0797491 |
| C | 1.9559605  | 3.978139   | -2.3821886 |
| H | 3.0071517  | 3.7608891  | -2.1570641 |
| H | 1.9003685  | 5.0271755  | -2.7200037 |
| H | 1.6559214  | 3.3424351  | -3.2277896 |
| C | -5.2204218 | -3.2802129 | -1.2177857 |
| H | -5.787799  | -3.2051492 | -0.2779339 |
| H | -5.3400688 | -4.3016553 | -1.6114437 |
| H | -5.6690857 | -2.5919871 | -1.9441274 |
| C | -6.2463651 | 0.1454765  | -1.1942588 |

|   |            |            |            |
|---|------------|------------|------------|
| H | -6.5087135 | -0.9174144 | -1.1335238 |
| H | -6.9060391 | 0.6226766  | -1.9360933 |
| H | -6.4455877 | 0.5986824  | -0.2120219 |
| C | 3.3457861  | -3.2537872 | -0.9288278 |
| C | 0.2511086  | 3.8176492  | 2.4805101  |
| H | -0.6109033 | 3.2940879  | 2.9146222  |
| H | 0.1706349  | 4.8822337  | 2.7602866  |
| H | 1.155771   | 3.4179034  | 2.9545506  |
| C | -2.9588221 | -3.0138771 | -2.3215588 |
| H | -3.0181323 | -2.0749306 | -2.8753777 |
| H | -3.3561188 | -3.8197303 | -2.9589999 |
| H | -1.8940674 | -3.2210846 | -2.150294  |
| C | -3.1627371 | -4.1666481 | -0.1544002 |
| H | -2.1111055 | -3.9969242 | 0.1222219  |
| H | -3.20702   | -5.0815359 | -0.7639014 |
| H | -3.7455893 | -4.3466725 | 0.7608505  |
| C | -4.5396109 | -0.1810526 | -3.016962  |
| H | -3.489201  | -0.0638266 | -3.3209754 |
| H | -5.1596043 | 0.3972258  | -3.71916   |
| H | -4.8237829 | -1.2330261 | -3.1219952 |
| C | 4.7029463  | 1.4828197  | -1.5631802 |
| H | 3.6793515  | 1.807719   | -1.7924121 |
| H | 5.363113   | 1.8472355  | -2.3637909 |
| H | 5.0247853  | 1.9609004  | -0.6289951 |
| C | 2.9026908  | 1.1594719  | 3.5760595  |
| H | 3.72119    | 1.7453656  | 3.1320794  |
| H | 2.8986926  | 1.3574116  | 4.6585191  |
| H | 1.9470234  | 1.5038682  | 3.1569536  |
| C | 2.6839544  | -3.1981336 | -2.3205472 |
| H | 1.5921075  | -3.2648242 | -2.2244362 |
| H | 3.0193556  | -4.0561638 | -2.9242864 |
| H | 2.9020066  | -2.2821179 | -2.8720754 |
| C | 4.4623459  | -0.7880535 | 3.8467362  |
| H | 4.6144081  | -1.8659717 | 3.6879176  |



|   |            |            |            |
|---|------------|------------|------------|
| H | 4.5367441  | -0.5828878 | 4.9261824  |
| H | 5.2739538  | -0.250446  | 3.3340256  |
| C | 4.616479   | -0.5809408 | -2.9156272 |
| H | 4.7974706  | -1.657673  | -2.9943561 |
| H | 5.3458493  | -0.0780981 | -3.5689555 |
| H | 3.6109376  | -0.3595188 | -3.3013435 |
| C | 2.6024453  | -4.3599364 | -0.1488053 |
| H | 3.1047274  | -4.6132466 | 0.7962461  |
| H | 2.5730869  | -5.2712035 | -0.764384  |
| H | 1.5642538  | -4.0669354 | 0.0690212  |
| C | -2.9943803 | 1.3788307  | 3.5469282  |
| H | -3.0317606 | 1.5737933  | 4.62942    |
| H | -3.7428406 | 2.0250554  | 3.0648289  |
| H | -1.9952938 | 1.6565109  | 3.1815156  |
| C | -4.6829303 | -0.4612727 | 3.781584   |
| H | -5.4482784 | 0.1370453  | 3.2650648  |
| H | -4.7574328 | -0.2642044 | 4.8626101  |
| H | -4.9073514 | -1.5240132 | 3.6071753  |

### 2-Ni (singlet)

|    |              |              |              |
|----|--------------|--------------|--------------|
| As | 13.827557862 | 8.493666776  | 14.043328335 |
| As | 13.520401637 | 10.788752040 | 12.237005312 |
| As | 12.530884343 | 11.144882021 | 14.884745400 |
| As | 15.987246841 | 10.605287953 | 13.599278973 |
| As | 14.705394396 | 10.282612939 | 15.704135760 |
| Ni | 15.134566496 | 8.999916515  | 12.189441274 |
| Ni | 11.841072556 | 9.536119101  | 13.382490983 |
| Fe | 14.394589558 | 12.224926097 | 14.020032234 |
| C  | 10.347456649 | 8.090879421  | 14.015256741 |
| C  | 9.837167385  | 9.403689783  | 14.172096087 |
| H  | 9.565130283  | 9.846561734  | 15.122816465 |
| C  | 16.836911736 | 7.638923414  | 11.864522181 |
| C  | 15.032407023 | 7.791431973  | 10.399940475 |
| H  | 14.128123571 | 7.551599705  | 9.856023842  |

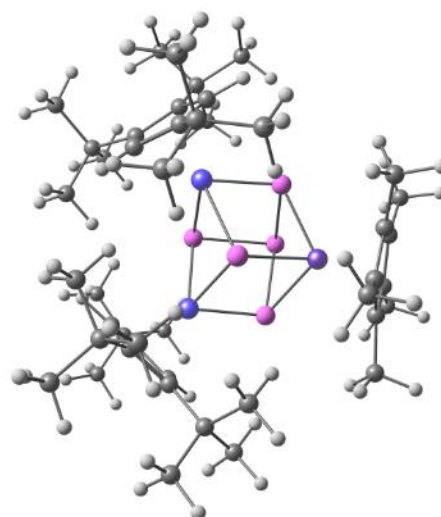

|   |              |              |              |
|---|--------------|--------------|--------------|
| C | 10.280926470 | 9.136151379  | 11.907606605 |
| C | 10.611480387 | 7.938467460  | 12.618156630 |
| H | 10.980629469 | 7.030372202  | 12.158115248 |
| C | 10.421253330 | 7.033652991  | 15.099453918 |
| C | 15.592152127 | 13.791032976 | 13.299929250 |
| C | 15.849703486 | 8.929336234  | 10.160719846 |
| C | 16.954501121 | 8.813587004  | 11.059822489 |
| H | 17.762647143 | 9.532674139  | 11.130684825 |
| C | 14.204624722 | 14.087833536 | 13.056018968 |
| C | 15.592138119 | 6.986369320  | 11.449657200 |
| C | 11.016614897 | 7.617932077  | 16.393533048 |
| H | 12.054736890 | 7.945715086  | 16.238561801 |
| H | 10.440400910 | 8.484485105  | 16.746570811 |
| H | 11.009006487 | 6.861191814  | 17.192341553 |
| C | 13.535217639 | 14.155637735 | 14.325218942 |
| C | 9.797384490  | 10.089201684 | 12.911026008 |
| C | 8.976005660  | 6.558064149  | 15.379583348 |
| H | 8.350297741  | 7.389452749  | 15.734512194 |
| H | 8.513368910  | 6.150415696  | 14.469019804 |
| H | 8.973151043  | 5.771686764  | 16.149924350 |
| C | 17.931881689 | 7.251308636  | 12.867867581 |
| C | 14.486879142 | 13.832872114 | 15.349302367 |
| C | 18.557857995 | 5.894239478  | 12.478889759 |
| H | 19.425103398 | 5.684813557  | 13.123516372 |
| H | 17.859313219 | 5.057185377  | 12.585501022 |
| H | 18.905591027 | 5.913851043  | 11.435498510 |
| C | 9.210040360  | 11.502293833 | 12.804964501 |
| C | 12.135006429 | 14.614978238 | 14.575188897 |
| H | 11.617227814 | 13.985593248 | 15.314078139 |
| H | 12.142189228 | 15.644815864 | 14.969081686 |
| H | 11.534398076 | 14.615983310 | 13.659040845 |
| C | 10.221043845 | 12.529119577 | 12.265112064 |
| H | 11.092259047 | 12.580681829 | 12.932191634 |
| H | 10.590408589 | 12.286046032 | 11.267393998 |

|   |              |              |              |
|---|--------------|--------------|--------------|
| H | 9.756814215  | 13.527364475 | 12.226635602 |
| C | 10.277143612 | 9.115263842  | 10.375004017 |
| C | 14.982433942 | 5.606714787  | 11.727570666 |
| C | 17.438441894 | 7.223804895  | 14.329218235 |
| H | 16.563804124 | 6.586685395  | 14.475037659 |
| H | 18.241742063 | 6.857894962  | 14.987526843 |
| H | 17.168372301 | 8.237258333  | 14.657698012 |
| C | 15.134465166 | 5.075107076  | 13.160482415 |
| H | 16.176012301 | 4.901406640  | 13.446390557 |
| H | 14.684404145 | 5.766767647  | 13.887343493 |
| H | 14.608056447 | 4.112667594  | 13.242945944 |
| C | 8.791637384  | 12.004640901 | 14.203024144 |
| H | 8.009964191  | 11.372934983 | 14.648106251 |
| H | 9.647807133  | 12.039334689 | 14.893054556 |
| H | 8.390799301  | 13.024776433 | 14.115361044 |
| C | 11.261627476 | 5.830019045  | 14.649134913 |
| H | 10.840996543 | 5.357144047  | 13.749986933 |
| H | 12.297043248 | 6.127790077  | 14.429639288 |
| H | 11.288429717 | 5.070173767  | 15.443944074 |
| C | 19.076188734 | 8.286873169  | 12.822673782 |
| H | 19.851577673 | 7.996343579  | 13.546177116 |
| H | 19.545634295 | 8.336954612  | 11.829346761 |
| H | 18.723378278 | 9.291332755  | 13.098127320 |
| C | 7.934996834  | 11.492300958 | 11.935097245 |
| H | 8.145356777  | 11.262074685 | 10.884934719 |
| H | 7.215710926  | 10.748985547 | 12.308324674 |
| H | 7.451531410  | 12.480626510 | 11.967683952 |
| C | 15.629324069 | 4.605923250  | 10.739634850 |
| H | 15.476354163 | 4.934591422  | 9.701728473  |
| H | 16.709498476 | 4.508671590  | 10.906350307 |
| H | 15.174036588 | 3.610198186  | 10.856687540 |
| C | 11.352040202 | 8.128622828  | 9.879111113  |
| H | 11.118585622 | 7.090209577  | 10.144522364 |
| H | 11.426200745 | 8.178859017  | 8.783284087  |

|   |              |              |              |
|---|--------------|--------------|--------------|
| H | 12.329301254 | 8.382054044  | 10.309677433 |
| C | 13.602274511 | 14.392022168 | 11.722625619 |
| H | 14.080900782 | 13.808703293 | 10.924876093 |
| H | 12.530695545 | 14.156839711 | 11.700337312 |
| H | 13.717390261 | 15.460012808 | 11.471406302 |
| C | 13.467296846 | 5.641408619  | 11.440327555 |
| H | 12.985589123 | 6.448303754  | 12.008309630 |
| H | 13.244969029 | 5.791583557  | 10.376519641 |
| H | 13.012543520 | 4.686743952  | 11.740762085 |
| C | 15.766033681 | 13.615961267 | 14.718304965 |
| C | 15.715844230 | 9.951611239  | 9.050470816  |
| C | 8.896737207  | 8.591592801  | 9.910754406  |
| H | 8.870511573  | 8.509282571  | 8.812870512  |
| H | 8.699565125  | 7.596832266  | 10.335138875 |
| H | 8.080682056  | 9.256730719  | 10.221399893 |
| C | 16.682846970 | 13.796216090 | 12.278636714 |
| H | 17.471354041 | 13.068208598 | 12.516673726 |
| H | 16.302621967 | 13.561209600 | 11.277235401 |
| H | 17.156924318 | 14.791042038 | 12.227317097 |
| C | 14.280449550 | 9.999110161  | 8.512230075  |
| H | 14.203578532 | 10.737939745 | 7.700600633  |
| H | 13.966729229 | 9.026496408  | 8.107582076  |
| H | 13.576353344 | 10.286121868 | 9.304825487  |
| C | 10.569885275 | 10.454082391 | 9.682167863  |
| H | 11.522594551 | 10.878472932 | 10.029361673 |
| H | 10.650493198 | 10.287987925 | 8.597611403  |
| H | 9.778267443  | 11.194613053 | 9.834453006  |
| C | 16.672338879 | 9.530275231  | 7.910138784  |
| H | 16.419252688 | 8.525635591  | 7.542064645  |
| H | 16.599784749 | 10.234933298 | 7.067513037  |
| H | 17.716175570 | 9.511503676  | 8.254852075  |
| C | 14.207638676 | 13.820849247 | 16.818372946 |
| H | 14.306454538 | 14.830711557 | 17.250809207 |
| H | 13.187676033 | 13.469529782 | 17.028946370 |

|   |              |              |              |
|---|--------------|--------------|--------------|
| H | 14.901751078 | 13.159946916 | 17.354505536 |
| C | 16.109288215 | 11.350032311 | 9.552504378  |
| H | 16.066879000 | 12.081643877 | 8.731364650  |
| H | 15.419317820 | 11.675359719 | 10.345364310 |
| H | 17.128266710 | 11.362570084 | 9.963086480  |
| C | 17.059045994 | 13.360872685 | 15.424444203 |
| H | 17.568895723 | 14.306293005 | 15.673322183 |
| H | 16.900038834 | 12.810364518 | 16.361749058 |
| H | 17.747001099 | 12.766485947 | 14.806698623 |

### 3-Ag (singlet)

|    |              |              |              |
|----|--------------|--------------|--------------|
| Ag | -0.139926000 | -1.480459000 | -0.010949000 |
| Fe | 2.812503000  | -0.086361000 | -2.462951000 |
| Ni | 4.562084000  | 1.670635000  | 0.077181000  |
| Ni | 3.911493000  | -2.090646000 | 0.375746000  |
| P  | 2.479205000  | 1.107079000  | -0.517775000 |
| P  | 2.176755000  | -1.013501000 | -0.457274000 |
| P  | 4.296176000  | -1.576615000 | -1.762068000 |
| P  | 4.825333000  | 0.676535000  | -1.913838000 |
| P  | 5.393084000  | -0.445785000 | 0.037177000  |
| C  | 5.504563000  | 2.557436000  | 1.791585000  |
| H  | 5.609721000  | 2.076828000  | 2.756518000  |
| C  | 3.009577000  | -3.266718000 | 1.857635000  |
| H  | 2.006470000  | -3.080796000 | 2.222516000  |
| C  | 4.388513000  | 3.362352000  | 1.389948000  |
| C  | 6.479036000  | 2.510606000  | 0.751581000  |
| C  | 4.189275000  | -2.707913000 | 2.411681000  |
| C  | 5.254444000  | -3.195387000 | 1.590347000  |
| H  | 6.297831000  | -2.930799000 | 1.720860000  |
| C  | 4.299737000  | -1.871329000 | 3.664601000  |
| C  | 1.439108000  | 0.966654000  | -3.699321000 |
| C  | 3.325184000  | -4.138224000 | 0.736539000  |
| C  | 4.690441000  | 3.848422000  | 0.018970000  |
| C  | 3.346680000  | 3.760086000  | 2.434726000  |

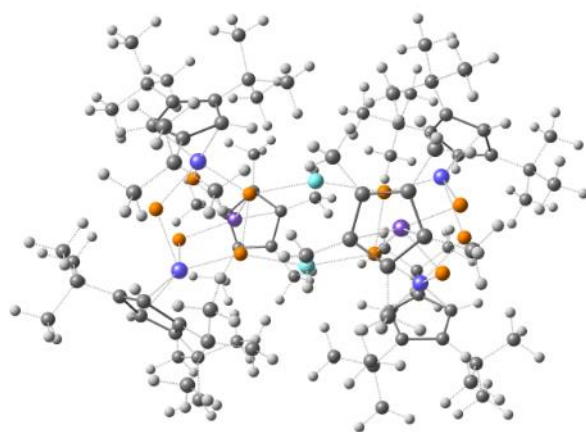

|   |             |              |              |
|---|-------------|--------------|--------------|
| C | 0.886957000 | -4.777913000 | 0.798256000  |
| H | 0.943607000 | -5.061785000 | 1.858808000  |
| H | 0.124251000 | -5.406901000 | 0.319658000  |
| H | 0.532533000 | -3.732283000 | 0.736653000  |
| C | 5.952212000 | 3.294105000  | -0.322251000 |
| H | 6.455246000 | 3.436880000  | -1.270896000 |
| C | 1.984700000 | -4.550461000 | -1.398643000 |
| H | 1.596951000 | -3.520610000 | -1.429450000 |
| H | 1.234503000 | -5.210922000 | -1.859656000 |
| H | 2.892178000 | -4.585024000 | -2.005874000 |
| C | 1.080290000 | -0.417430000 | -3.627857000 |
| C | 3.902507000 | 4.999868000  | 3.180466000  |
| H | 3.203903000 | 5.295861000  | 3.977604000  |
| H | 4.039601000 | 5.857143000  | 2.510304000  |
| H | 4.873250000 | 4.771455000  | 3.642585000  |
| C | 2.768316000 | 1.056325000  | -4.237893000 |
| C | 4.768203000 | -4.093109000 | 0.573643000  |
| C | 3.188331000 | 2.620074000  | 3.457800000  |
| H | 4.104069000 | 2.443652000  | 4.036130000  |
| H | 2.911380000 | 1.685900000  | 2.953900000  |
| H | 2.399543000 | 2.880637000  | 4.176663000  |
| C | 2.228313000 | -4.968857000 | 0.063691000  |
| C | 8.369699000 | 1.436378000  | -0.529286000 |
| H | 7.779571000 | 0.555434000  | -0.821140000 |
| H | 9.423049000 | 1.130053000  | -0.458137000 |
| H | 8.296510000 | 2.182815000  | -1.332610000 |
| C | 7.901896000 | 1.999767000  | 0.824558000  |
| C | 2.634267000 | 4.356366000  | -1.397943000 |
| H | 2.764587000 | 3.420591000  | -1.958211000 |
| H | 2.178339000 | 5.104087000  | -2.064740000 |
| H | 1.934701000 | 4.153190000  | -0.584468000 |
| C | 4.004190000 | 4.851531000  | -0.913218000 |
| C | 3.035636000 | -1.019694000 | 3.826390000  |
| H | 2.875618000 | -0.409342000 | 2.926346000  |

|   |              |              |              |
|---|--------------|--------------|--------------|
| H | 3.130669000  | -0.351032000 | 4.693961000  |
| H | 2.145276000  | -1.642151000 | 3.981678000  |
| C | 5.778287000  | -4.818304000 | -0.322073000 |
| C | 3.224828000  | -0.284127000 | -4.508218000 |
| C | 2.180357000  | -1.196912000 | -4.128745000 |
| C | 5.284185000  | -5.165270000 | -1.735208000 |
| H | 4.446701000  | -5.869757000 | -1.740503000 |
| H | 6.105856000  | -5.636901000 | -2.292867000 |
| H | 4.989836000  | -4.257468000 | -2.281815000 |
| C | 8.083181000  | 0.938847000  | 1.918794000  |
| H | 7.772722000  | 1.311485000  | 2.905628000  |
| H | 9.143699000  | 0.658785000  | 1.990056000  |
| H | 7.507877000  | 0.031951000  | 1.688440000  |
| C | 7.039758000  | -3.942530000 | -0.508737000 |
| H | 6.788030000  | -2.958510000 | -0.932700000 |
| H | 7.726853000  | -4.444457000 | -1.203820000 |
| H | 7.589973000  | -3.787991000 | 0.428751000  |
| C | 2.569697000  | -6.471684000 | 0.164575000  |
| H | 3.466233000  | -6.740230000 | -0.402766000 |
| H | 1.733947000  | -7.068438000 | -0.229762000 |
| H | 2.731855000  | -6.762933000 | 1.212450000  |
| C | 1.944850000  | 4.073714000  | 1.894583000  |
| H | 1.269221000  | 4.269353000  | 2.740001000  |
| H | 1.538719000  | 3.220559000  | 1.327404000  |
| H | 1.920882000  | 4.957374000  | 1.249694000  |
| C | 0.536183000  | 2.108932000  | -3.379575000 |
| H | -0.136767000 | 1.856030000  | -2.544106000 |
| H | -0.089828000 | 2.356362000  | -4.252538000 |
| H | 1.090386000  | 3.010995000  | -3.099429000 |
| C | 6.200275000  | -6.112331000 | 0.416555000  |
| H | 6.616632000  | -5.878052000 | 1.407008000  |
| H | 6.973517000  | -6.637332000 | -0.163740000 |
| H | 5.355035000  | -6.797871000 | 0.558637000  |
| C | -0.248096000 | -0.948413000 | -3.227505000 |

|   |              |              |              |
|---|--------------|--------------|--------------|
| H | -0.180873000 | -1.982639000 | -2.867065000 |
| H | -0.935701000 | -0.943553000 | -4.086669000 |
| H | -0.712752000 | -0.341507000 | -2.436542000 |
| C | 5.519295000  | -0.942770000 | 3.605366000  |
| H | 6.458879000  | -1.497897000 | 3.477857000  |
| H | 5.601220000  | -0.367218000 | 4.539075000  |
| H | 5.420675000  | -0.234794000 | 2.769854000  |
| C | 8.761210000  | 3.241265000  | 1.180971000  |
| H | 8.675667000  | 4.020769000  | 0.410412000  |
| H | 9.818555000  | 2.947389000  | 1.256556000  |
| H | 8.453765000  | 3.673071000  | 2.144497000  |
| C | 4.441633000  | -2.838415000 | 4.863149000  |
| H | 3.577023000  | -3.515031000 | 4.927228000  |
| H | 4.507610000  | -2.271644000 | 5.803822000  |
| H | 5.348651000  | -3.452762000 | 4.769722000  |
| C | 4.862687000  | 5.063951000  | -2.178472000 |
| H | 5.847059000  | 5.491746000  | -1.942214000 |
| H | 4.347465000  | 5.767866000  | -2.846955000 |
| H | 5.009946000  | 4.126006000  | -2.732960000 |
| C | 3.881634000  | 6.227581000  | -0.222756000 |
| H | 3.192656000  | 6.215800000  | 0.628747000  |
| H | 3.505616000  | 6.967236000  | -0.944789000 |
| H | 4.861562000  | 6.573870000  | 0.135826000  |
| C | 2.180978000  | -2.671654000 | -4.364534000 |
| H | 3.178517000  | -3.108186000 | -4.220275000 |
| H | 1.872972000  | -2.890878000 | -5.399979000 |
| H | 1.485900000  | -3.188534000 | -3.692209000 |
| C | 3.491934000  | 2.307733000  | -4.614629000 |
| H | 3.130015000  | 3.174443000  | -4.048875000 |
| H | 3.342463000  | 2.523395000  | -5.685120000 |
| H | 4.574822000  | 2.219515000  | -4.448416000 |
| C | 4.526720000  | -0.653897000 | -5.141243000 |
| H | 5.318435000  | 0.065892000  | -4.892436000 |
| H | 4.428091000  | -0.673646000 | -6.238605000 |



|    |              |              |              |
|----|--------------|--------------|--------------|
| H  | 4.864706000  | -1.648825000 | -4.820909000 |
| Ag | 0.140094000  | 1.481173000  | 0.010617000  |
| Fe | -2.811887000 | 0.087290000  | 2.462824000  |
| Ni | -4.562142000 | -1.670921000 | -0.075129000 |
| Ni | -3.911263000 | 2.089862000  | -0.377324000 |
| P  | -2.479040000 | -1.107768000 | 0.519015000  |
| P  | -2.176447000 | 1.012754000  | 0.455930000  |
| P  | -4.293754000 | 1.578257000  | 1.761326000  |
| P  | -4.826322000 | -0.673955000 | 1.914698000  |
| P  | -5.392806000 | 0.445676000  | -0.037130000 |
| C  | -5.505356000 | -2.557338000 | -1.789217000 |
| H  | -5.610798000 | -2.076492000 | -2.753989000 |
| C  | -3.009817000 | 3.266121000  | -1.859611000 |
| H  | -2.006686000 | 3.080495000  | -2.224567000 |
| C  | -4.389192000 | -3.362325000 | -1.388010000 |
| C  | -6.479444000 | -2.510466000 | -0.748891000 |
| C  | -4.189402000 | 2.706775000  | -2.413348000 |
| C  | -5.254598000 | 3.194052000  | -1.591906000 |
| H  | -6.297921000 | 2.929096000  | -1.722216000 |
| C  | -4.299882000 | 1.869863000  | -3.666089000 |
| C  | -1.439409000 | -0.966896000 | 3.699522000  |
| C  | -3.325495000 | 4.137642000  | -0.738602000 |
| C  | -4.690784000 | -3.848583000 | -0.017007000 |
| C  | -3.347662000 | -3.759859000 | -2.433164000 |
| C  | -0.887317000 | 4.777504000  | -0.800339000 |
| H  | -0.943847000 | 5.061044000  | -1.860986000 |
| H  | -0.124693000 | 5.406670000  | -0.321840000 |
| H  | -0.532883000 | 3.731894000  | -0.738352000 |
| C  | -5.952335000 | -3.294104000 | 0.324734000  |
| H  | -6.455086000 | -3.436969000 | 1.273518000  |
| C  | -1.985182000 | 4.550771000  | 1.396511000  |
| H  | -1.597216000 | 3.521004000  | 1.427709000  |
| H  | -1.235142000 | 5.211513000  | 1.857377000  |
| H  | -2.892703000 | 4.585378000  | 2.003682000  |

|   |              |              |              |
|---|--------------|--------------|--------------|
| C | -1.079268000 | 0.416778000  | 3.627444000  |
| C | -3.904257000 | -4.998770000 | -3.179751000 |
| H | -3.205883000 | -5.294611000 | -3.977148000 |
| H | -4.041794000 | -5.856434000 | -2.510178000 |
| H | -4.874903000 | -4.769481000 | -3.641641000 |
| C | -2.768732000 | -1.055061000 | 4.238000000  |
| C | -4.768505000 | 4.092166000  | -0.575513000 |
| C | -3.188751000 | -2.619098000 | -3.455299000 |
| H | -4.104518000 | -2.441362000 | -4.033169000 |
| H | -2.910853000 | -1.685626000 | -2.950608000 |
| H | -2.400420000 | -2.879684000 | -4.174647000 |
| C | -2.228753000 | 4.968619000  | -0.065985000 |
| C | -8.369424000 | -1.435228000 | 0.532210000  |
| H | -7.779334000 | -0.553939000 | 0.823075000  |
| H | -9.422888000 | -1.129204000 | 0.461441000  |
| H | -8.295573000 | -2.181061000 | 1.336034000  |
| C | -7.902279000 | -1.999498000 | -0.821497000 |
| C | -2.634177000 | -4.357151000 | 1.399058000  |
| H | -2.764167000 | -3.421504000 | 1.959607000  |
| H | -2.178099000 | -5.105097000 | 2.065497000  |
| H | -1.934887000 | -4.153845000 | 0.585384000  |
| C | -4.004370000 | -4.851984000 | 0.914747000  |
| C | -3.034862000 | 1.019688000  | -3.828849000 |
| H | -2.873026000 | 0.410180000  | -2.928553000 |
| H | -3.130163000 | 0.350306000  | -4.695817000 |
| H | -2.145492000 | 1.643154000  | -3.985694000 |
| C | -5.778744000 | 4.817383000  | 0.320050000  |
| C | -3.223848000 | 0.285993000  | 4.508012000  |
| C | -2.178481000 | 1.197586000  | 4.128192000  |
| C | -5.284612000 | 5.165470000  | 1.732904000  |
| H | -4.447204000 | 5.870059000  | 1.737614000  |
| H | -6.106314000 | 5.637490000  | 2.290198000  |
| H | -4.990206000 | 4.258156000  | 2.280260000  |
| C | -8.083898000 | -0.939246000 | -1.916337000 |

|   |              |              |              |
|---|--------------|--------------|--------------|
| H | -7.774153000 | -1.312653000 | -2.903107000 |
| H | -9.144381000 | -0.658925000 | -1.987149000 |
| H | -7.508188000 | -0.032347000 | -1.686979000 |
| C | -7.039799000 | 3.941175000  | 0.507420000  |
| H | -6.787587000 | 2.957570000  | 0.932053000  |
| H | -7.727068000 | 4.443285000  | 1.202200000  |
| H | -7.590017000 | 3.785701000  | -0.429911000 |
| C | -2.570316000 | 6.471381000  | -0.167514000 |
| H | -3.467033000 | 6.739979000  | 0.399515000  |
| H | -1.734743000 | 7.068405000  | 0.226792000  |
| H | -2.732276000 | 6.762199000  | -1.215537000 |
| C | -1.945912000 | -4.074631000 | -1.893485000 |
| H | -1.270630000 | -4.270234000 | -2.739194000 |
| H | -1.539106000 | -3.222010000 | -1.326011000 |
| H | -1.922309000 | -4.958654000 | -1.249086000 |
| C | -0.537261000 | -2.109960000 | 3.380380000  |
| H | 0.133922000  | -1.859050000 | 2.542851000  |
| H | 0.090650000  | -2.355327000 | 4.252561000  |
| H | -1.092064000 | -3.012657000 | 3.103559000  |
| C | -6.201341000 | 6.110812000  | -0.419264000 |
| H | -6.617850000 | 5.875822000  | -1.409484000 |
| H | -6.974614000 | 6.635918000  | 0.160896000  |
| H | -5.356338000 | 6.796534000  | -0.561940000 |
| C | 0.249630000  | 0.946153000  | 3.226690000  |
| H | 0.183540000  | 1.980546000  | 2.866554000  |
| H | 0.937553000  | 0.940234000  | 4.085582000  |
| H | 0.713212000  | 0.338838000  | 2.435397000  |
| C | -5.518268000 | 0.939801000  | -3.605625000 |
| H | -6.458388000 | 1.493760000  | -3.477102000 |
| H | -5.600458000 | 0.364196000  | -4.539285000 |
| H | -5.417859000 | 0.231937000  | -2.770220000 |
| C | -8.761898000 | -3.241107000 | -1.176779000 |
| H | -8.676230000 | -4.020103000 | -0.405722000 |
| H | -9.819222000 | -2.947117000 | -1.252213000 |

|   |              |              |              |
|---|--------------|--------------|--------------|
| H | -8.454840000 | -3.673614000 | -2.140113000 |
| C | -4.443976000 | 2.836514000  | -4.864664000 |
| H | -3.580342000 | 3.514296000  | -4.929533000 |
| H | -4.509904000 | 2.269499000  | -5.805193000 |
| H | -5.351752000 | 3.449659000  | -4.770667000 |
| C | -4.862430000 | -5.064492000 | 2.180286000  |
| H | -5.847033000 | -5.491913000 | 1.944304000  |
| H | -4.347165000 | -5.768770000 | 2.848354000  |
| H | -5.009169000 | -4.126659000 | 2.735089000  |
| C | -3.882387000 | -6.227917000 | 0.223957000  |
| H | -3.193717000 | -6.216129000 | -0.627794000 |
| H | -3.506291000 | -6.967825000 | 0.945690000  |
| H | -4.862534000 | -6.573887000 | -0.134339000 |
| C | -2.177506000 | 2.672435000  | 4.363306000  |
| H | -3.174848000 | 3.109751000  | 4.220100000  |
| H | -1.867969000 | 2.891912000  | 5.398241000  |
| H | -1.482855000 | 3.188386000  | 3.689806000  |
| C | -3.493710000 | -2.305604000 | 4.614982000  |
| H | -3.132553000 | -3.172854000 | 4.049561000  |
| H | -3.344733000 | -2.521106000 | 5.685571000  |
| H | -4.576467000 | -2.216343000 | 4.448455000  |
| C | -4.525320000 | 0.657203000  | 5.141059000  |
| H | -5.317881000 | -0.061621000 | 4.892140000  |
| H | -4.426694000 | 0.676673000  | 6.238426000  |
| H | -4.862137000 | 1.652571000  | 4.820865000  |

### 1-Ni (singlet)

|    |              |              |              |
|----|--------------|--------------|--------------|
| Fe | -0.111186000 | 2.543867000  | -0.135982000 |
| Ni | -1.765875000 | -0.731756000 | -0.318212000 |
| Ni | 1.904215000  | -0.466625000 | 0.222781000  |
| P  | -1.282612000 | 0.967540000  | 1.082916000  |
| P  | 0.847564000  | 1.129662000  | 1.389275000  |
| P  | 1.307431000  | 1.182940000  | -1.161852000 |
| P  | -1.059204000 | 1.049784000  | -1.451415000 |

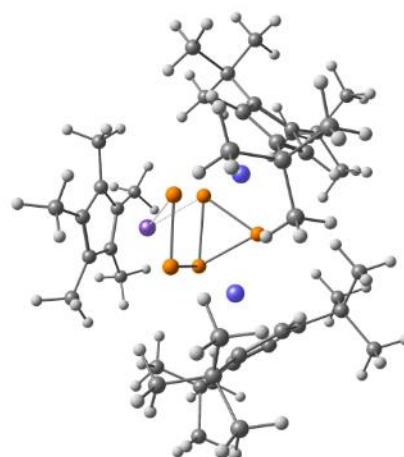

|   |              |              |              |
|---|--------------|--------------|--------------|
| P | 0.266877000  | -0.882465000 | -1.241913000 |
| C | -2.613722000 | -2.551117000 | 0.461594000  |
| H | -2.149399000 | -3.166090000 | 1.223255000  |
| C | 3.444366000  | -0.699279000 | 1.654511000  |
| H | 3.563404000  | -0.009536000 | 2.481031000  |
| C | -3.506563000 | -1.454937000 | 0.719249000  |
| C | -2.448667000 | -2.727153000 | -0.941779000 |
| C | 2.613569000  | -1.860231000 | 1.695462000  |
| C | 2.716010000  | -2.437649000 | 0.403701000  |
| H | 2.196020000  | -3.334078000 | 0.084608000  |
| C | 1.854103000  | -2.407075000 | 2.886628000  |
| C | -1.336364000 | 4.213294000  | 0.311421000  |
| C | 4.104687000  | -0.573022000 | 0.378775000  |
| C | -3.919954000 | -0.933478000 | -0.596951000 |
| C | -4.019636000 | -1.245027000 | 2.151546000  |
| C | 5.399522000  | 1.291384000  | 1.477206000  |
| H | 5.784710000  | 0.616240000  | 2.255433000  |
| H | 6.151273000  | 2.075682000  | 1.305007000  |
| H | 4.490218000  | 1.781398000  | 1.854877000  |
| C | -3.255206000 | -1.733383000 | -1.571477000 |
| H | -3.312697000 | -1.581949000 | -2.642556000 |
| C | 4.645766000  | 1.621557000  | -0.843715000 |
| H | 3.764617000  | 2.130739000  | -0.430293000 |
| H | 5.435487000  | 2.374087000  | -0.999968000 |
| H | 4.360672000  | 1.211255000  | -1.816092000 |
| C | -0.152610000 | 4.218186000  | 1.124389000  |
| C | -5.182278000 | -2.248323000 | 2.351120000  |
| H | -5.569620000 | -2.176641000 | 3.379797000  |
| H | -6.010710000 | -2.049069000 | 1.657474000  |
| H | -4.839151000 | -3.279196000 | 2.180184000  |
| C | -0.931147000 | 4.256610000  | -1.067354000 |
| C | 3.625326000  | -1.677890000 | -0.431670000 |
| C | -2.908164000 | -1.583550000 | 3.168734000  |
| H | -2.592666000 | -2.633178000 | 3.112580000  |

|   |              |              |              |
|---|--------------|--------------|--------------|
| H | -2.026552000 | -0.945484000 | 3.012139000  |
| H | -3.283130000 | -1.408683000 | 4.188104000  |
| C | 5.132047000  | 0.548594000  | 0.149383000  |
| C | -1.359553000 | -3.511155000 | -3.077470000 |
| H | -0.669163000 | -2.655168000 | -3.084328000 |
| H | -0.857876000 | -4.364190000 | -3.558662000 |
| H | -2.237789000 | -3.254037000 | -3.687384000 |
| C | -1.762526000 | -3.884050000 | -1.640558000 |
| C | -4.504521000 | 1.555377000  | -0.516384000 |
| H | -3.568550000 | 1.864219000  | -1.005411000 |
| H | -5.284897000 | 2.289203000  | -0.774518000 |
| H | -4.334987000 | 1.595057000  | 0.560800000  |
| C | -4.907070000 | 0.158369000  | -1.021245000 |
| C | 1.698926000  | -1.335540000 | 3.977125000  |
| H | 1.166018000  | -0.453251000 | 3.591008000  |
| H | 1.124945000  | -1.743023000 | 4.822925000  |
| H | 2.675346000  | -1.006454000 | 4.363458000  |
| C | 3.988854000  | -2.193272000 | -1.827837000 |
| C | 0.504633000  | 4.300028000  | -1.107454000 |
| C | 0.989616000  | 4.275438000  | 0.249314000  |
| C | 4.156735000  | -1.079003000 | -2.873676000 |
| H | 5.027625000  | -0.444269000 | -2.677433000 |
| H | 4.297027000  | -1.526946000 | -3.869223000 |
| H | 3.260982000  | -0.440644000 | -2.907919000 |
| C | -0.523392000 | -4.348927000 | -0.862245000 |
| H | -0.789193000 | -4.687002000 | 0.149315000  |
| H | -0.039211000 | -5.188544000 | -1.383293000 |
| H | 0.203938000  | -3.530783000 | -0.770896000 |
| C | 2.884808000  | -3.130702000 | -2.364616000 |
| H | 1.913123000  | -2.617520000 | -2.414013000 |
| H | 3.152465000  | -3.455861000 | -3.380858000 |
| H | 2.772807000  | -4.035923000 | -1.752159000 |
| C | 6.485471000  | -0.028109000 | -0.315596000 |
| H | 6.436062000  | -0.443538000 | -1.328388000 |

|   |              |              |              |
|---|--------------|--------------|--------------|
| H | 7.244706000  | 0.769173000  | -0.322442000 |
| H | 6.828352000  | -0.821520000 | 0.364862000  |
| C | -4.509970000 | 0.166447000  | 2.510939000  |
| H | -4.817638000 | 0.172725000  | 3.567804000  |
| H | -3.701803000 | 0.901366000  | 2.390572000  |
| H | -5.374943000 | 0.484465000  | 1.919981000  |
| C | -2.734279000 | 4.251178000  | 0.836011000  |
| H | -2.862185000 | 3.555190000  | 1.677472000  |
| H | -2.983944000 | 5.264139000  | 1.194367000  |
| H | -3.464373000 | 3.980087000  | 0.064503000  |
| C | 5.282910000  | -3.035430000 | -1.721733000 |
| H | 5.137141000  | -3.871308000 | -1.021315000 |
| H | 5.540363000  | -3.455318000 | -2.707140000 |
| H | 6.135685000  | -2.444997000 | -1.367256000 |
| C | -0.121734000 | 4.219420000  | 2.618728000  |
| H | 0.806028000  | 3.768994000  | 2.996974000  |
| H | -0.190763000 | 5.246133000  | 3.016527000  |
| H | -0.960767000 | 3.641631000  | 3.032437000  |
| C | 0.460766000  | -2.879309000 | 2.445699000  |
| H | 0.532139000  | -3.684431000 | 1.701855000  |
| H | -0.104738000 | -3.263120000 | 3.308794000  |
| H | -0.101204000 | -2.051392000 | 1.991613000  |
| C | -2.788006000 | -5.042489000 | -1.689657000 |
| H | -3.692288000 | -4.741102000 | -2.238610000 |
| H | -2.349966000 | -5.916770000 | -2.196491000 |
| H | -3.088846000 | -5.343800000 | -0.675327000 |
| C | 2.649942000  | -3.603703000 | 3.454867000  |
| H | 3.657542000  | -3.291386000 | 3.767882000  |
| H | 2.133188000  | -4.028602000 | 4.329943000  |
| H | 2.758694000  | -4.396741000 | 2.700044000  |
| C | -4.949566000 | 0.264715000  | -2.560743000 |
| H | -5.296921000 | -0.667291000 | -3.029996000 |
| H | -5.649113000 | 1.064769000  | -2.845173000 |
| H | -3.960800000 | 0.521200000  | -2.969332000 |

|   |              |              |              |
|---|--------------|--------------|--------------|
| C | -6.333512000 | -0.212404000 | -0.558428000 |
| H | -6.428819000 | -0.242611000 | 0.532873000  |
| H | -7.056239000 | 0.526227000  | -0.938672000 |
| H | -6.616776000 | -1.201423000 | -0.948586000 |
| C | 2.411550000  | 4.390345000  | 0.695420000  |
| H | 3.109297000  | 4.167316000  | -0.121566000 |
| H | 2.629799000  | 5.411794000  | 1.049968000  |
| H | 2.626184000  | 3.696036000  | 1.521085000  |
| C | -1.837558000 | 4.312511000  | -2.255244000 |
| H | -2.819144000 | 3.873156000  | -2.032611000 |
| H | -2.001182000 | 5.354624000  | -2.577108000 |
| H | -1.416854000 | 3.760537000  | -3.107719000 |
| C | 1.341904000  | 4.401111000  | -2.342463000 |
| H | 0.868353000  | 3.885474000  | -3.189604000 |
| H | 1.492544000  | 5.454859000  | -2.631553000 |
| H | 2.331552000  | 3.947150000  | -2.196340000 |

## 6 References

- [1] a) O. J. Scherer, T. Brück, *Angew. Chem. Int. Ed. Engl.* **1987**, 59; b) O. J. Scherer, C. Blath, G. Wollmershäuser, *J. Organomet. Chem.* **1990**, 387, C21-C24.
- [2] M. V. Butovskiy, G. Balázs, M. Bodensteiner, E. V. Peresyphkina, A. V. Virovets, J. Sutter, M. Scheer, *Angew. Chem. Int. Ed.* **2013**, 52, 2972.
- [3] J.-M. Lalancette, G. Rollin, P. Dumas, *Can. J. Chem.* **1972**, 50, 3058.
- [4] M. W. Wallasch, F. Rudolphi, G. Wollmershäuser, H. Sitzmann, *Z. Naturforsch.* **2009**, 64b, 11.
- [5] M. Kreye, C. G. Daniliuc, M. Freytag, P. G. Jones, M. D. Walter, *Dalt. Trans.* **2014**, 43, 9052.
- [6] M. Maekawa, M. Römelt, C. G. Daniliuc, P. G. Jones, P. S. White, F. Neese, M. D. Walter, *Chem. Sci.* **2012**, 3, 2972.
- [7] M. Schär, D. Saurenz, F. Zimmer, I. Schädlich, G. Wolmershäuser, S. Demeshko, F. Meyer, H. Sitzmann, O. M. Heigl, F. H. Köhler, *Organometallics* **2013**, 32, 6298.



- [8] T. Köchner, N. Trapp, T. A. Engesser, A. J. Lehner, C. Röhr, S. Riedel, C. Knapp, H. Scherer, I. Krossing, *Angew. Chem. Int. Ed.* **2011**, *50*, 11253.
- [9] D. F. Evans, *J. Chem. Soc.* **1959**, 2003.
- [10] M. D. Walter, C. D. Sofield, C. H. Booth, R. A. Andersen, *Organometallics* **2009**, *28*, 2005.
- [11] G. M. Sheldrick, *Acta Cryst.* **2015**, *C71*, 3.
- [12] O. V. Dolomanov, L. J. Bourhis, R. J. Gildea, J. A. K. Howard, H. Puschmann, *J. Appl. Cryst.* **2009**, *42*, 339.
- [13] M. J. Frisch, G. W. Trucks, H. B. Schlegel, G. E. Scuseria, M. A. Robb, J. R. Cheeseman, G. Scalmani, V. Barone, G. A. Petersson, H. Nakatsuji, X. Li, M. Caricato, A. V. Marenich, J. Bloino, B. G. Janesko, R. Gomperts, B. Mennucci, H. P. Hratchian, J. V. Ortiz, A. F. Izmaylov, J. L. Sonnenberg, D. Williams-Young, F. Ding, F. Lipparini, F. Egidi, J. Goings, B. Peng, A. Petrone, T. Henderson, D. Ranasinghe, V. G. Zakrzewski, J. Gao, N. Rega, G. Zheng, W. Liang, M. Hada, M. Ehara, K. Toyota, R. Fukuda, J. Hasegawa, M. Ishida, T. Nakajima, Y. Honda, O. Kitao, H. Nakai, T. Vreven, K. Throssell, J. A. Montgomery, Jr., J. E. Peralta, F. Ogliaro, M. J. Bearpark, J. J. Heyd, E. N. Brothers, K. N. Kudin, V. N. Staroverov, T. A. Keith, R. Kobayashi, J. Normand, K. Raghavachari, A. P. Rendell, J. C. Burant, S. S. Iyengar, J. Tomasi, M. Cossi, J. M. Millam, M. Klene, C. Adamo, R. Cammi, J. W. Ochterski, R. L. Martin, K. Morokuma, O. Farkas, J. B. Foresman, D. J. Fox, *Gaussian Inc. Revision C.01*, Wallingford CT, **2016**.
- [14] a) A. D. Becke, *Phys. Rev. A.* **1988**, 3098; b) J. P. Perdew, *Phys. Rev. B.* **1986**, 8822.
- [15] F. Weigend, R. Ahlrichs, *Phys. Chem. Chem. Phys.* **2005**, *7*, 3297.
- [16] a) Reed A. E., L. A. Curtiss, F. Weinhold, *Chem. Rev.* **1988**, *88*, 899; b) Reed A. E., R. B. Weinstock, F. Weinhold, *J. Chem. Phys.* **1985**, 735; c) E. D. Glendening, C. R. Landis, F. Weinhold, *J. Comp. Chem.* **2019**, *40*, 2234.
- [17] a) S. Grimme, J. Antony, S. Ehrlich, H. Krieg, *J. Chem. Phys.* **2010**, *132*, 154104; b) S. Grimme, S. Ehrlich, L. Goerigk, *J. Comp. Chem.* **2011**, *32*, 1456.
- [18] G. A. Zhurko, *Chemcraft - graphical program for visualization of quantum chemistry computations.* <https://chemcraftprog.com>.
